# Supplementary material for: The Cultural Ecohydrogeology of Mediterranean-Climate Springs: A Global Review with Case Studies
Source: Preprints.org preprint supplement (doi:10.20944/preprints202401.1035.v1), 2024-01-12
Supplement: Supplementary file 3 [file supplementary]

## Sheet: Total
Publication Type	Authors	Book Authors	Book Editors	Book Group Authors	Author Full Names	Book Author Full Names	Group Authors	Article Title	Source Title	Book Series Title	Book Series Subtitle	Language	Document Type	Conference Title	Conference Date	Conference Location	Conference Sponsor	Conference Host	Author Keywords	Keywords Plus	Abstract	Addresses	Affiliations	Reprint Addresses	Email Addresses	Researcher Ids	ORCIDs	Funding Orgs	Funding Name Preferred	Funding Text	Cited References	Cited Reference Count	Times Cited, WoS Core	Times Cited, All Databases	180 Day Usage Count	Since 2013 Usage Count	Publisher	Publisher City	Publisher Address	ISSN	eISSN	ISBN	Journal Abbreviation	Journal ISO Abbreviation	Publication Date	Publication Year	Volume	Issue	Part Number
J	Voudouris, K; Yapijakis, C; Georgaki, MN; Angelakis, AN				Voudouris, K.; Yapijakis, C.; Georgaki, M. -N; Angelakis, A. N.			Historical issues of hydrotherapy in thermal-mineral springs of the Hellenic world	SUSTAINABLE WATER RESOURCES MANAGEMENT			English	Article						Asclepieia; Balneotherapy; Classical and Hellenistic periods; Medicine; Water	WATER; AQUEDUCTS; GREECE; ORIGIN	Many springs have been recorded in Greece; some of them are characterized as thermo-mineral springs and are associated with their position between Eurasia and Africa, the volcanic activity, and the presence of tectonic faults. The therapeutic use of water (hydrotherapy) has been recorded in ancient Greece since at least 1000 BC. Asclepius was the god of medicine in ancient Greek religion and prie…	[Voudouris, K.; Georgaki, M. -N] Aristotle Univ Thessaloniki AUTh, Sch Geol, Lab Engn Geol & Hydrogeol, Thessaloniki 54124, Greece; [Voudouris, K.] AUTh, UNESCO Ctr Integrated & Multidisciplinary Water Re, Thessaloniki, Greece; [Yapijakis, C.] Natl Kapodistrian Univ Athens, Sch Med, Dept Pediat 1, Aghia Sophia Childrens Hosp, Thivon 1, Athens 11527, Greece; [Yapijakis, C.] Univ Res Inst Maternal …	Aristotle University of Thessaloniki; Aristotle University of Thessaloniki; National & Kapodistrian University of Athens; Athens Medical School; The Aghia Sophia Children's Hospital	Voudouris, K (corresponding author), Aristotle Univ Thessaloniki AUTh, Sch Geol, Lab Engn Geol & Hydrogeol, Thessaloniki 54124, Greece.;Voudouris, K (corresponding author), AUTh, UNESCO Ctr Integrated & Multidisciplinary Water Re, Thessaloniki, Greece.	kvoudour@geo.auth.gr; cyapi@med.uoa.gr; angelak@edeya.gr		Voudouris, Konstantinos/0000-0002-5409-1740; GEORGAKI, MARIA NEFELI/0000-0002-1829-4735	HEAL-Link Greece	HEAL-Link Greece	Open access funding provided by HEAL-Link Greece. This research received no external funding.		48	0	0	1	2	SPRINGER INT PUBL AG	CHAM	GEWERBESTRASSE 11, CHAM, CH-6330, SWITZERLAND	2363-5037	2363-5045		SUST WAT RESOUR MAN	Sustain. Wat. Resour. Manag.	FEB	2023	9	1
C	Parise, M; Liso, IS		Andreo, B; Barbera, JA; Duran-Valsero, JJ; Gil-Marquez, JM; Mudarra, M		Parise, M.; Liso, I. S.			The Link Between Man and Water in Karst, Through Examples From Apulia (S Italy)	EUROKARST 2022: ADVANCES IN THE HYDROGEOLOGY OF KARST AND CARBONATE RESERVOIRS	Advances in Karst Science		English	Proceedings Paper	3rd European Bi-Annual Conference on the Hydrogeology of Karst and Carbonate Reservoirs (Eurokarst)	JUN 22-25, 2022	Malaga, SPAIN	Univ Malaga,UNESCO, Intergovernmental Hydrol Programme,Van Walt,Valeport Water,Int Assoc Hydrogeologist,Springer Verlag AG,Acad Malaguena Ciencias,Fundac Cueva Nerja,TRAQUA,Sondeos Martinez,Tetraedre,Albillia,FluoTechnik,Picarro,Distribuciones Ind & Cientificas,EIC Grp		Springs; Water; History; Apulia	IMPACTS	In this contribution three different sites from the Apulian karst of southern Italy are illustrated about the issue of water flowing out in caves, and how these latter represented remarkable sites for the historical development of ancient local communities. The goal of the work is to highlight the strong link between water and human presence, and the related cults, in the karst settings of Apulia…	[Parise, M.; Liso, I. S.] Univ Aldo Moro, Dept Earth & Environm Sci, Via Edoardo Orabona 4, I-70125 Bari, Italy	Universita degli Studi di Bari Aldo Moro	Parise, M (corresponding author), Univ Aldo Moro, Dept Earth & Environm Sci, Via Edoardo Orabona 4, I-70125 Bari, Italy.	mario.parise@uniba.it							37	0	0	1	2	SPRINGER INTERNATIONAL PUBLISHING AG	CHAM	GEWERBESTRASSE 11, CHAM, CH-6330, SWITZERLAND	2511-2066	2511-2082	978-3-031-16879-6	ADV KARST SCI			2023
J	Stevenazzi, S; Zuffetti, C; Camera, CAS; Lucchelli, A; Beretta, GP; Bersezio, R; Masetti, M				Stevenazzi, Stefania; Zuffetti, Chiara; Camera, Corrado A. S.; Lucchelli, Alice; Beretta, Giovanni Pietro; Bersezio, Riccardo; Masetti, Marco			Hydrogeological characteristics and water availability in the mountainous aquifer systems of Italian Central Alps: A regional scale approach	JOURNAL OF ENVIRONMENTAL MANAGEMENT			English	Article						Groundwater body; Groundwater budget; Groundwater quality; Stable isotope analysis; Geological modelling; Italy	CLIMATE-CHANGE; KARST AQUIFERS; ROCK GLACIERS; GROUNDWATER; PRECIPITATION; EVAPOTRANSPIRATION; AREAS; INVENTORY; EXAMPLE; BASIN	Groundwater resources in mountain areas are strategically important to maintain adequate water supply for domestic uses, farming, industrial activities, and energy production, also considering the expected growing demand due to ongoing climate changes. Within this framework, the objective of the study is to develop a regional approach, compliant with the European requirements of the Water Framewo…	[Stevenazzi, Stefania] Univ Napoli Federico II, Dipartimento Ingn Civile Edile & Ambientale, 80 Piazzale Tecchio, I-80125 Naples, Italy; [Zuffetti, Chiara; Camera, Corrado A. S.; Lucchelli, Alice; Beretta, Giovanni Pietro; Bersezio, Riccardo; Masetti, Marco] Univ Milan, Dipartimento Sci Terra A Desio, Via Luigi Mangiagalli, 34, I-20133 Milan, Italy	University of Naples Federico II; University of Milan	Camera, CAS (corresponding author), Univ Milan, Dipartimento Sci Terra A Desio, Via Luigi Mangiagalli, 34, I-20133 Milan, Italy.	corrado.camera@unimi.it	zuffetti, chiara/AAO-2066-2020; Masetti, Marco/N-6823-2013	Masetti, Marco/0000-0001-7961-8046; Stevenazzi, Stefania/0000-0003-2855-9829; ZUFFETTI, CHIARA/0000-0002-7391-4829; Lucchelli, Alice/0000-0003-0428-5210	Regione Lombardia in the framework of a collaboration agreement with the Dipartimento di Scienze della Terra A. Desio of the Universita degli Studi di Milano	Regione Lombardia in the framework of a collaboration agreement with the Dipartimento di Scienze della Terra A. Desio of the Universita degli Studi di Milano	This study was partially supported by Regione Lombardia in the framework of a collaboration agreement with the Dipartimento di Scienze della Terra A. Desio of the Universita degli Studi di Milano. The authors also thank ARPA Regione Lombardia and the local water supply companies for supporting spring water sampling.When this study began, S. Stevenazzi was affiliated with the Dipartimento di Scien…		88	1	1	6	9	ACADEMIC PRESS LTD- ELSEVIER SCIENCE LTD	LONDON	24-28 OVAL RD, LONDON NW1 7DX, ENGLAND	0301-4797	1095-8630		J ENVIRON MANAGE	J. Environ. Manage.	AUG 15	2023	340
J	Ranghetti, L; Boschetti, M				Ranghetti, Luigi; Boschetti, Mirco			Updated trends of water management practice in the Italian rice paddies from remotely sensed imagery	EUROPEAN JOURNAL OF REMOTE SENSING			English	Article						Flood mapping; MODIS; rice crop; optical remote sensing; water monitoring	MODIS; IRRIGATION	The rice growing district in northwestern Italy, where paddies were traditionally flooded throughout spring, was interested by a general decrease of standing water presence caused by the adoption of dry seeding crop practices, with consequences for water management and for the ecology of breeding waterbirds. This communication analyses changes in flooding dynamics in the last four years, estimati…	[Ranghetti, Luigi] IBF Servizi SpA, Via Cavicchini 2, FE-44037 Jolanda Di Savoia, Italy; [Ranghetti, Luigi; Boschetti, Mirco] CNR, Inst Remote Sensing Environm, Milan, Italy	Consiglio Nazionale delle Ricerche (CNR)	Ranghetti, L (corresponding author), IBF Servizi SpA, Via Cavicchini 2, FE-44037 Jolanda Di Savoia, Italy.	luigi@ranghetti.info	Boschetti, Mirco/C-9351-2017; Ranghetti, Luigi/N-8770-2016	Boschetti, Mirco/0000-0003-2156-4166; Ranghetti, Luigi/0000-0001-6207-5188					41	3	3	4	46	TAYLOR & FRANCIS LTD	ABINGDON	2-4 PARK SQUARE, MILTON PARK, ABINGDON OR14 4RN, OXON, ENGLAND		2279-7254		EUR J REMOTE SENS	Eur. J. Remote Sens.	DEC 31	2022	55	1
J	Lerback, JC; Bowen, BB; Macfarlan, SJ; Schniter, E; Garcia, JJ; Caughman, L				Lerback, J. C.; Bowen, B. B.; Macfarlan, S. J.; Schniter, E.; Garcia, J. J.; Caughman, L.			Development of a graphical resilience framework to understand a coupled human-natural system in a remote arid highland of Baja California Sur	SUSTAINABILITY SCIENCE			English	Article						Sustainability; Resilience; Water management; Cultural anthropology; Hydrology; Rural societies	CONCEPTUAL-FRAMEWORK; VARIABILITY; MANAGEMENT; HYDROLOGY; RAINFALL; SCIENCE; PEOPLE; MODELS; CARBON	Hydrological systems are important to society as water resources and effective management requires an understanding of how water and humans influence each other. To describe human-water connections it is necessary to bridge social and natural sciences. To this end, we construct an interdisciplinary graphical framework for evaluating potential human-water system resilience, which is a tool to show…	[Lerback, J. C.; Bowen, B. B.] Univ Utah, Dept Geol & Geophys, Salt Lake City, UT 84112 USA; [Lerback, J. C.] Univ Calif Los Angeles, Dept Earth Planetary & Space Sci, Los Angeles, CA 90095 USA; [Bowen, B. B.; Macfarlan, S. J.] Univ Utah, Global Change & Sustainabil Ctr, Salt Lake City, UT USA; [Macfarlan, S. J.] Univ Utah, Dept Anthropol, Salt Lake City, UT 84112 USA; [Macfarlan, S. J.] Univ Uta…	Utah System of Higher Education; University of Utah; University of California System; University of California Los Angeles; Utah System of Higher Education; University of Utah; Utah System of Higher Education; University of Utah; Utah System of Higher Education; University of Utah; California State University System; California State University Fullerton; Arizona State University; Arizona State U…	Lerback, JC (corresponding author), Univ Utah, Dept Geol & Geophys, Salt Lake City, UT 84112 USA.;Lerback, JC (corresponding author), Univ Calif Los Angeles, Dept Earth Planetary & Space Sci, Los Angeles, CA 90095 USA.	jlerback@ucla.edu			National Geographic Research and Exploration Grant Award [HJ-099R-17]; National Science Foundation IBSS-L Award [1620416]; Society, Water and Climate (from the Global Change and Sustainability Center); Funding Incentive Seed Grant (University of Utah); iNterdisciplinary EXchange for Utah Science (NEXUS); EARTH core facilities; [00083096]; Direct For Social, Behav & Economic Scie; SBE Off Of Multi…	National Geographic Research and Exploration Grant Award; National Science Foundation IBSS-L Award(National Science Foundation (NSF)); Society, Water and Climate (from the Global Change and Sustainability Center); Funding Incentive Seed Grant (University of Utah); iNterdisciplinary EXchange for Utah Science (NEXUS); EARTH core facilities; ; Direct For Social, Behav & Economic Scie; SBE Off Of Mul…	We recognize our funders: National Geographic Research and Exploration Grant Award #HJ-099R-17, National Science Foundation IBSS-L Award #1620416, Society, Water and Climate (from the Global Change and Sustainability Center), Funding Incentive Seed Grant (University of Utah), iNterdisciplinary EXchange for Utah Science (NEXUS), and the EARTH core facilities. Thank you to M. Howitz and A. Jayo for…		78	2	2	0	11	SPRINGER JAPAN KK	TOKYO	SHIROYAMA TRUST TOWER 5F, 4-3-1 TORANOMON, MINATO-KU, TOKYO, 105-6005, JAPAN	1862-4065	1862-4057		SUSTAIN SCI	Sustain. Sci.	MAY	2022	17	3
J	Loffredo, F				Loffredo, Fernando			A CAPTIVE HISTORY OF SCULPTURE: ABDUCTING ITALIAN FOUNTAINS IN THE EARLY MODERN SPANISH MEDITERRANEAN	JOURNAL OF THE WARBURG AND COURTAULD INSTITUTES			English	Article								This article explores the transformative power of art circulation by analysing surprising nar-ratives of abducted fountains across the early modern Mediterranean area under the polit-ical influence of the Spanish Empire. The object of this study will be the stories of Italian fountains stolen by Spanish viceroys or rescued during naval skirmishes between the Holy League and the Ottoman Empire. Th…	[Loffredo, Fernando] SUNY Stony Brook, Stony Brook, NY 11794 USA	State University of New York (SUNY) System; State University of New York (SUNY) Stony Brook	Loffredo, F (corresponding author), SUNY Stony Brook, Stony Brook, NY 11794 USA.								146	0	0	1	1	WARBURG INST	LONDON	UNIV LONDON WOBURN SQUARE, LONDON WC1H 0AB, ENGLAND	0075-4390	2044-0014		J WARBURG COURTAULD	J. Warbg. Court. Inst.		2022	85
J	Zafeirakou, A; Karavi, A; Katsoulea, A; Zorpas, A; Papamichael, I				Zafeirakou, Antigoni; Karavi, Aristi; Katsoulea, Anastasia; Zorpas, Antonis; Papamichael, Iliana			Water resources management in the framework of the circular economy for touristic areas in the Mediterranean: case study of Sifnos Island in Greece	EURO-MEDITERRANEAN JOURNAL FOR ENVIRONMENTAL INTEGRATION			English	Article						Water resources management; Wastewater reuse; Touristic regions; Circular economy		The Aegean Islands Water District (WD 14), and more specifically the island of Sifnos, is facing many problems with water deficiency due to dry climatological conditions and population growth during the summer months, which is also reflected in its economy. As tourism is the main economic sector in coastal areas, managing water competently during the summer months is vital. In an effort to develo…	[Zafeirakou, Antigoni; Karavi, Aristi; Katsoulea, Anastasia] Aristotle Univ Thessaloniki, Dept Civil Engn, Div Hydraul & Environm Engn, Thessaloniki 54124, Greece; [Zorpas, Antonis; Papamichael, Iliana] Open Univ Cyprus, Fac Pure & Appl Sci, Lab Chem Engn & Engn Sustainabil, Latsia, Cyprus	Aristotle University of Thessaloniki; Open University of Cyprus	Zafeirakou, A (corresponding author), Aristotle Univ Thessaloniki, Dept Civil Engn, Div Hydraul & Environm Engn, Thessaloniki 54124, Greece.;Papamichael, I (corresponding author), Open Univ Cyprus, Fac Pure & Appl Sci, Lab Chem Engn & Engn Sustainabil, Latsia, Cyprus.	azafir@civil.auth.gr; karavi.aristi@gmail.com; Anakatsoulea@gmail.com; antoniszorpas@yahoo.com; iliana.papamichael@gmail.com	Katsoulea, Anastasia/HLW-5273-2023	Papamichael, Iliana/0000-0003-3564-2890					29	4	4	3	6	SPRINGER HEIDELBERG	HEIDELBERG	TIERGARTENSTRASSE 17, D-69121 HEIDELBERG, GERMANY	2365-6433	2365-7448		EURO-MEDITERR J ENVI	Euro-Mediterr. J. Environ. Integrat.	SEP	2022	7	3
J	Piscopo, V; Sbarbati, C; Lotti, F; Lana, L; Petitta, M				Piscopo, Vincenzo; Sbarbati, Chiara; Lotti, Francesca; Lana, Luigi; Petitta, Marco			Sustainability Indicators of Groundwater Withdrawal in a Heavily Stressed System: The Case of the Acque Albule Basin (Rome, Italy)	SUSTAINABILITY			English	Article						sustainable yield; thermal water; residual discharge; Acque Albule Basin	WATER-BUDGET MYTH; SAFE YIELD; PLEISTOCENE; TRAVERTINES; SCIENCE; TIVOLI	Groundwater sustainable yield is a concept widely treated theoretically in the literature. Moving from theoretical concepts to the definition of practical measures for groundwater management is not easy due to site-specific characteristics of the system. This study is aimed at identifying which factors influence the sustainable yield of the plain of Tivoli (Central Italy), where thermal springs w…	[Piscopo, Vincenzo; Sbarbati, Chiara] Tuscia Univ, Dept Ecol & Biol Sci, I-01100 Viterbo, Italy; [Lotti, Francesca] SYMPLE Srl, Piazza Cura 7, I-01019 Vetralla, Italy; [Lotti, Francesca; Lana, Luigi] Katadima Srl, Lgo F Baracca 18, I-01019 Vetralla, Italy; [Petitta, Marco] Univ Roma La Sapienza, Earth Sci Dept, I-00185 Rome, Italy	Tuscia University; Sapienza University Rome	Sbarbati, C (corresponding author), Tuscia Univ, Dept Ecol & Biol Sci, I-01100 Viterbo, Italy.	chiara.sbarbati@unitus.it		PETITTA, Marco/0000-0003-1137-6137; SBARBATI, Chiara/0000-0002-0294-1918; PISCOPO, Vincenzo/0000-0001-8006-0940	Department of Ecological and Biological Sciences (2021) of the University of Tuscia; PNRR Geosciences IR (Missione 4 Istruzione e Ricerca-Componente 2 Dalla ricerca all'impresa-Linea di investimento 3.1, Fondo per la realizzazione di un Sistema integrato di infrastrutture di ricerca e innovazione Finanziato dall'Unione Europea Next [CUP I53C22000800006]	Department of Ecological and Biological Sciences (2021) of the University of Tuscia; PNRR Geosciences IR (Missione 4 Istruzione e Ricerca-Componente 2 Dalla ricerca all'impresa-Linea di investimento 3.1, Fondo per la realizzazione di un Sistema integrato di infrastrutture di ricerca e innovazione Finanziato dall'Unione Europea Next	This project was supported by a grant from the Department of Ecological and Biological Sciences (2021) of the University of Tuscia and by a grant from PNRR Geosciences IR (Missione 4 Istruzione e Ricerca-Componente 2 Dalla ricerca all'impresa-Linea di investimento 3.1, Fondo per la realizzazione di un Sistema integrato di infrastrutture di ricerca e innovazione Finanziato dall'Unione Europea Next…		53	1	1	1	1	MDPI	BASEL	ST ALBAN-ANLAGE 66, CH-4052 BASEL, SWITZERLAND		2071-1050		SUSTAINABILITY-BASEL	Sustainability	NOV	2022	14	22
J	Mondani, M; Gizzi, M; Taddia, G				Mondani, Michele; Gizzi, Martina; Taddia, Glenda			Role of Snowpack-Hydrometeorological Sensors for Hydrogeological System Comprehension inside an Alpine Closed-Basin	SENSORS			English	Article						hydrogeology; climate change; groundwater monitoring; mountain spring; Italy	PRECIPITATION EXTREMES; CLIMATE-CHANGE; WATER; VARIABILITY; IMPACTS	Groundwater resource assessment and forecasting in mountain areas requires the monitoring of two conditions, local meteorological conditions, and springs' groundwater parameters. The reliability of the monitoring data and conditions are linked to the technical instrumentation, multiparametric probes, and sensors. This paper presents a set of attractive tools and sensors for springs' groundwater r…	[Mondani, Michele; Gizzi, Martina; Taddia, Glenda] Politecn Torino, Dept Environm Land & Infrastruct Engn DIATI, I-10129 Turin, Italy	Polytechnic University of Turin	Taddia, G (corresponding author), Politecn Torino, Dept Environm Land & Infrastruct Engn DIATI, I-10129 Turin, Italy.	glenda.taddia@polito.it	Mondani, Michele/HTP-0832-2023; Gizzi, Martina/HJG-6624-2022	Mondani, Michele/0000-0002-1156-8342; Gizzi, Martina/0000-0001-7791-3260	Sommer GmbH Co.	Sommer GmbH Co.	This article is in memory of Marina De Maio, who had the intuition of the potentiality of this research and passed away before this work had been concluded. The Authors are extremely grateful to Enrico Suozzi, who started this work and made the preliminary results at the beginning of the Mascognaz site creation. A special thanks is devoted to Corr-Tek, San Giovanni Lupatoto, Italy, and Sommer Gmb…		43	1	1	1	3	MDPI	BASEL	ST ALBAN-ANLAGE 66, CH-4052 BASEL, SWITZERLAND		1424-8220		SENSORS-BASEL	Sensors	OCT	2022	22	19
J	Cusano, D; Allocca, V; Coda, S; Lepore, D; Vassallo, M; De Vita, P				Cusano, Delia; Allocca, Vincenzo; Coda, Silvio; Lepore, Daniele; Vassallo, Massimiliano; De Vita, Pantaleone			The survey of Italian springs by the National Hydrographic Service, a forgotten database. Structuring and analysis of a dataset of Campania springs (southern Italy)	ACQUE SOTTERRANEE-ITALIAN JOURNAL OF GROUNDWATER			English	Article						discharge measurements; spring survey; Campania region; hydrogeological characterization	GROUNDWATER-FLOW; KARST AQUIFERS; CLIMATE-CHANGE; APENNINES	The analysis of groundwater resources is a particularly significant aspect of the economic, social and environmental development of the national territory. This is particularly relevant for the Campania region which, although characterized by the most significant aquifer systems of southern Italy, suffers from critical issues related to the progressive increase in demand and climatic variability …	[Cusano, Delia; Allocca, Vincenzo; Coda, Silvio; Lepore, Daniele] Univ Naples Federico II, Dept Earth Environm & Resources Sci DiSTAR, Naples, Italy; [De Vita, Pantaleone] InterUniv Ctr Predict & Prevent Major Hazards CUG, Naples, Italy	University of Naples Federico II	Cusano, D; Allocca, V (corresponding author), Univ Naples Federico II, Dept Earth Environm & Resources Sci DiSTAR, Naples, Italy.	delia.cusano@unina.it; vincenzo.allocca@unina.it	Coda, Silvio/GQA-9297-2022; Lepore, Daniele/JJF-1678-2023	Lepore, Daniele/0000-0003-2166-0940; Cusano, Delia/0000-0002-6751-7990; Coda, Silvio/0000-0003-2744-4771					38	1	1	0	0	PAGEPRESS PUBL	PAVIA	MEDITGROUP, VIA G BELLI, 4, PAVIA, 27100, ITALY	1828-454X			ACQUE SOTTER	Acque Sotter.		2022	11	2
J	Ozcelik, M				Ozcelik, Mehmet			Potential effects of excessive water withdrawal from boreholes drilled in the Antalya (Turkey) travertine plateau and well interactions	EURO-MEDITERRANEAN JOURNAL FOR ENVIRONMENTAL INTEGRATION			English	Article						Drilling; Extreme water withdrawal; Well interaction; Travertine; Antalya	INFLUENCE RADIUS; PUMPING WELL	Food and water demand has risen in recent years as a result of global population growth, economic development, and dietary changes. These trends, combined with the continued use of groundwater resources, have resulted in significant aquifer depletion rates in every country. Antalya's current water resources are springs and underground waters on the travertine plateau. On the karstic travertine pl…	[Ozcelik, Mehmet] Suleyman Demirel Univ, Engn Fac, Geol Engn, Isparta, Turkey	Suleyman Demirel University	Ozcelik, M (corresponding author), Suleyman Demirel Univ, Engn Fac, Geol Engn, Isparta, Turkey.	ozcelikmehmet@sdu.edu.tr	Ozcelik, Mehmet/AAE-9565-2020	Ozcelik, Mehmet/0000-0003-4511-1946					27	0	0	2	8	SPRINGER HEIDELBERG	HEIDELBERG	TIERGARTENSTRASSE 17, D-69121 HEIDELBERG, GERMANY	2365-6433	2365-7448		EURO-MEDITERR J ENVI	Euro-Mediterr. J. Environ. Integrat.	JUN	2022	7	2
J	Romano, D; Magazù, S; Sabatino, G; Di Bella, M; Tripodo, A; Nania, G; Gattuso, A; Italiano, F				Romano, D.; Magazu, S.; Sabatino, G.; Di Bella, M.; Tripodo, A.; Nania, G.; Gattuso, A.; Italiano, F.			Radon concentration in groundwater of north-eastern Sicily (Italy)	JOURNAL OF INSTRUMENTATION			English	Article						Dosimetry concepts and apparatus; Radiation calculations; Radiation damage evaluation methods	METAMORPHIC EVOLUTION; RN-222 ACTIVITY; DRINKING-WATER; PELORITANI; ARCHITECTURE; EXPOSURE; BELT	This paper presents analyses of Rn-222 activity concentration performed on groundwater samples collected from wells and natural springs in 70 different sites of the crystalline area of north-eastern Sicily (southern Italy), up to now poorly studied. Alpha spectroscopy of the short-lived radon progeny was used to measure the Rn-222 activity concentration by means of the Durridge RAD7 + H2O setup. …	[Romano, D.; Magazu, S.; Sabatino, G.; Tripodo, A.; Nania, G.] Univ Messina, Dipartimento Sci Matemat & Informat, Sci Fis & Sci Terra MIFT, Viale Stagno dAlcontres 31, I-98166 Messina, Italy; [Romano, D.; Di Bella, M.; Gattuso, A.; Italiano, F.] Ist Nazl Geofis & Vulcanol, Sez Palermo, Via Ugo La Malfa 153, I-90146 Palermo, Italy; [Romano, D.; Di Bella, M.; Gattuso, A.; Italiano, F.] Ist Nazl Geo…	University of Messina; Istituto Nazionale Geofisica e Vulcanologia (INGV); Istituto Nazionale Geofisica e Vulcanologia (INGV)	Romano, D (corresponding author), Univ Messina, Dipartimento Sci Matemat & Informat, Sci Fis & Sci Terra MIFT, Viale Stagno dAlcontres 31, I-98166 Messina, Italy.;Romano, D (corresponding author), Ist Nazl Geofis & Vulcanol, Sez Palermo, Via Ugo La Malfa 153, I-90146 Palermo, Italy.;Romano, D (corresponding author), Ist Nazl Geofis & Vulcanol, Sez Palermo, Sede Operat Milazzo, Via Mille 46, I-980…	davide.romano@ingv.it		Romano, Davide/0000-0002-2122-0737	FSE (Fondo Sociale Europeo)	FSE (Fondo Sociale Europeo)	This study was funded by the FSE (Fondo Sociale Europeo) operational program (OP) for Sicily 2014-2020 and it represents a part of the PhD thesis of Davide Romano (PhD in Physics at the University of Messina) . The authors thank Janja Vaupotic for her precious advices that improved the quality of the manuscript, and Carmelo Allegra, Davide Calabr?, Marco Fiumara, Andrea Maio and Antonio Torre for…		56	1	1	0	0	IOP Publishing Ltd	BRISTOL	TEMPLE CIRCUS, TEMPLE WAY, BRISTOL BS1 6BE, ENGLAND	1748-0221			J INSTRUM	J. Instrum.	SEP	2022	17	9
J	Spanoudi, S; Colfinopoulos, A; Kalavrouziotis, I				Spanoudi, S.; Colfinopoulos, A.; Kalavrouziotis, I			Water management in ancient Alexandria, Egypt. Comparison with Constantinople Hydraulic System	WATER SUPPLY			English	Article						Alexandria; cisterns; hellenistic period; Hippodamus system; rainwater management; reservoirs; tanks; water management	CISTERNS; HISTORY	The collection, evaluation and listing of all available data related to the supply, collection and disposal of water, is a project of combining and recording all the data for infrastructure projects and their structure within the urban structure of Alexandria and the wider region, as it was discovered and studied to this day. The paper is a description of the most important storage structures for…	[Spanoudi, S.] TEI Thessaloniki & Waste Management STET, EAP, Thessaloniki, Greece; [Colfinopoulos, A.; Kalavrouziotis, I] Waste Management Technol, Thessaloniki, Greece		Spanoudi, S (corresponding author), TEI Thessaloniki & Waste Management STET, EAP, Thessaloniki, Greece.	sspanoudi@gmail.com							45	1	1	0	5	IWA PUBLISHING	LONDON	REPUBLIC-EXPORT BLDG, UNITS 1 04 & 1 05, 1 CLOVE CRESCENT, LONDON, ENGLAND	1606-9749	1607-0798		WATER SUPPLY	Water Supply	NOV	2021	21	7
J	Chatzis, K; Mahera, A; Mavrogonatou, G				Chatzis, Konstantinos; Mahera, Anna; Mavrogonatou, Georgia			Supplying the city of Ioannina with 'modern' waters, 1913-1940: the 'modern infrastructural ideal' in a mid-size Greek town	URBAN HISTORY			English	Article								A part of the Ottoman Empire for centuries, the city of Ioannina integrated into the Greek state following the Balkan wars of 1912-13. This article provides a first in-depth historical account of the city's water supply system from the early 1910s to the eve of World War II, and traces the path leading from a traditional system relying on private wells and public fountains to a modern water netwo…	[Chatzis, Konstantinos] 6&8 Ave Blaise Pascal, F-77455 Marne La Vallee, France; [Mahera, Anna] Univ Ioannina, GR-45110 Ioannina, Greece; [Mavrogonatou, Georgia] 9 Heroon Polytech Str, GR-15780 Zografos, Greece	University of Ioannina	Mavrogonatou, G (corresponding author), 9 Heroon Polytech Str, GR-15780 Zografos, Greece.	gmavr@central.ntua.gr		Mavrogonatou, Georgia/0000-0002-8284-4615					50	0	0	0	2	CAMBRIDGE UNIV PRESS	CAMBRIDGE	EDINBURGH BLDG, SHAFTESBURY RD, CB2 8RU CAMBRIDGE, ENGLAND	0963-9268	1469-8706		URBAN HIST	Urban Hist.	FEB	2021	48	1
J	Rogers, DK				Rogers, Dylan Kelby			Sensing Water in Roman Greece: The Villa of Herodes Atticus at Eva-Loukou and the Sanctuary of Demeter and Kore at Eleusis	AMERICAN JOURNAL OF ARCHAEOLOGY			English	Article							MEMORY	The water displays in Roman Greece in the villa of Herodes Atticus at Eva-Loukou and in the forecourt of the sanctuary of Demeter and Kore at Eleusis demonstrate diverse uses and contexts of flowing water. By focusing on the sensorial experience an ancient individual had with these structures, especially through the framework of a sensorial assemblage, we can highlight how sensory elements had th…	[Rogers, Dylan Kelby] Univ Virginia, Dept Art, Fayerweather Hall,POB 400130, Charlottesville, VA 22903 USA	University of Virginia	Rogers, DK (corresponding author), Univ Virginia, Dept Art, Fayerweather Hall,POB 400130, Charlottesville, VA 22903 USA.	dkr5t@virginia.edu							191	5	5	1	1	ARCHAEOLOGICAL INST AMERICA	BOSTON	656 BEACON STREET, BOSTON, MA 02215 USA	0002-9114	1939-828X		AM J ARCHAEOL	Am. J. Archaeol.	JAN	2021	125	1
J	Fernández-Mejuto, M; Andreu, JM; García-Sánchez, E; Palencia, R				Fernandez-Mejuto, Miguel; Miguel Andreu, Jose; Garcia-Sanchez, Ernesto; Palencia, Rebeca			An Assessment of Groundwater Recharge at a Regional Scale for Sustainable Resource Management: Province of Alicante (SE Spain)	WATER			English	Article						aquifer management; groundwater recharge; Mediterranean region; recharge coefficient; Natural Aquifer Recharge (RENATA); Southeast Spain	CLIMATE-CHANGE; SPATIAL-DISTRIBUTION; SEGURA BASIN; SIMPLE-MODEL; WATER; AQUIFERS; OVEREXPLOITATION; VARIABILITY; DEPLETION; QUALITY	For decades, the Province of Alicante, located in the Southeast of Spain, has experienced important economic development associated with groundwater exploitation. The scarcity of superficial resources and irregular distribution in the time and space of rainfall, typical of the Mediterranean environment, together with the extensive limestone outcrops, have made groundwater a key resource for the a…	[Fernandez-Mejuto, Miguel; Palencia, Rebeca] Diputac Prov Alicante, Area Ciclo Hidr, Alicante 03006, Spain; [Fernandez-Mejuto, Miguel; Miguel Andreu, Jose] Univ Alicante, Inst Water & Environm Sci, Alicante 03690, Spain; [Garcia-Sanchez, Ernesto] Univ Miguel Hernandez Elche, Dept Agrochem & Environm, Elche 03202, Spain	Universitat d'Alacant; Universidad Miguel Hernandez de Elche	Fernández-Mejuto, M (corresponding author), Diputac Prov Alicante, Area Ciclo Hidr, Alicante 03006, Spain.;Fernández-Mejuto, M (corresponding author), Univ Alicante, Inst Water & Environm Sci, Alicante 03690, Spain.	mfmejuto@diputaciondealicante.es; andreu.rodes@ua.es; ernesto.garcia@umh.es; r.palencia@diputaciondealicante.es			Spanish Ministry of Economy and Competitiveness (ALTERACLIM) [CGL2015-69773-C2-1-P]; Ministry of Science and Innovation [PID2019-111332RB-C21]; Catedra del Agua (Water Chair) of the University of Alicante; Diputacion de Alicante	Spanish Ministry of Economy and Competitiveness (ALTERACLIM); Ministry of Science and Innovation(Spanish Government); Catedra del Agua (Water Chair) of the University of Alicante; Diputacion de Alicante	This research was funded partially by the projects of the Spanish Ministry of Economy and Competitiveness (ALTERACLIM; CGL2015-69773-C2-1-P) and the Ministry of Science and Innovation (PID2019-111332RB-C21). In the same way, this work was partially funded by Catedra del Agua (Water Chair) of the University of Alicante and Diputacion de Alicante (https://catedradelaguaua.org/accessed on 10 Februar…		96	4	4	1	6	MDPI	BASEL	ST ALBAN-ANLAGE 66, CH-4052 BASEL, SWITZERLAND		2073-4441		WATER-SUI	Water	MAR	2021	13	6
J	Benmarce, K; Hadji, R; Zahri, F; Khanchoul, K; Chouabi, A; Zighmi, K; Hamed, Y				Benmarce, Kadour; Hadji, Riheb; Zahri, Farid; Khanchoul, Kamal; Chouabi, Abdelmadjid; Zighmi, Karim; Hamed, Younes			Hydrochemical and geothermometry characterization for a geothermal system in semiarid dry climate: The case study of Hamma spring (Northeast Algeria)	JOURNAL OF AFRICAN EARTH SCIENCES			English	Article						Spring; Geothermometry; Geothermal gradient; IIRG; Electrical conductivity	THERMAL SPRINGS; GROUNDWATER; SUSCEPTIBILITY; REGION; GIS; HYDROGEOCHEMISTRY; AQUIFER; TUNISIA; GENESIS; WATERS	Climate change has increased the odds of worsening drought in arid and semiarid dry regions of North Africa. Although the thermal waters have a minimal influence on the yield of aquifers systems, these resources have a great socio-economic value, being widely used for various rheumatologic, dermatologic and psychiatric treatments. Our study aims to characterize the physicochemical parameters and …	[Benmarce, Kadour; Hadji, Riheb; Zahri, Farid; Zighmi, Karim] Univ Ferhat Abbas, Inst Architecture & Earth Sci, Dept Earth Sci, Setif, Algeria; [Benmarce, Kadour; Hadji, Riheb; Zahri, Farid; Zighmi, Karim] Setif 1 Univ, Lab Appl Res Engn Geol Geotech Water Sci & Enviro, Setif, Algeria; [Khanchoul, Kamal; Chouabi, Abdelmadjid] Badji Mokhtar Univ, Annaba, Algeria; [Hamed, Younes] Univ Gafsa, Fac Sc…	Universite Ferhat Abbas Setif; Universite Badji Mokhtar - Annaba	Hadji, R (corresponding author), Univ Farhat Abbas, Dept Earth Sci, Setif, Algeria.	kaddour.benmarce.24@gmail.com; hadjirihab@yahoo.fr; zahrifarid@yahoo.fr; kamel.khanchoul@univ-annaba.dz; mchouabbi@yahoo.fr; zighmi.karim19@gmail.com; hamed_younes@yahoo.fr	Hamed, Younes/ABC-6660-2021; HADJI, Riheb/P-7390-2016	HADJI, Riheb/0000-0002-9632-0812	International Association of Water Resources in the Southern Mediterranean Basin (Tunisia); laboratory of hydrogeology, University of Annaba, (Algeria); laboratory for the Application of Materials to the Environment, Water and Energy (Tunisia)	International Association of Water Resources in the Southern Mediterranean Basin (Tunisia); laboratory of hydrogeology, University of Annaba, (Algeria); laboratory for the Application of Materials to the Environment, Water and Energy (Tunisia)	This study was supported by the International Association of Water Resources in the Southern Mediterranean Basin (Tunisia), laboratory of hydrogeology, University of Annaba, (Algeria) and laboratory for the Application of Materials to the Environment, Water and Energy (Tunisia). We wish to acknowledge the General Direction of Scientific Research and Technological Development (DGRSDT).		66	9	9	0	8	PERGAMON-ELSEVIER SCIENCE LTD	OXFORD	THE BOULEVARD, LANGFORD LANE, KIDLINGTON, OXFORD OX5 1GB, ENGLAND	1464-343X	1879-1956		J AFR EARTH SCI	J. Afr. Earth Sci.	OCT	2021	182
J	Akar, T; Gemici, U; Somay-Altas, M; Tarcan, G				Akar, Toygar; Gemici, Unsal; Somay-Altas, Melis; Tarcan, Gultekin			Numerical modeling of fluid flow and heat transfer in Kursunlu geothermal field-KGF (Salihli, Manisa / Turkey)	TURKISH JOURNAL OF EARTH SCIENCES			English	Article						Geothermal aquifer; groundwater modeling; fluid flow mechanism; Salihli; FEFLOW	WESTERN ANATOLIA; MENDERES-MASSIF; EVOLUTION; WATERS; AREAS	Nowadays, the need for energy is increasing more and more. It is more difficult to acquire new resources in various fields than to preserve existing energy resources. Although Turkey is a very rich state in terms of various energy resources, misuse of these resources can even lead to conflicts that may occur between the states in forthcoming years. In today's economic conditions, we can only prot…	[Akar, Toygar; Gemici, Unsal; Somay-Altas, Melis; Tarcan, Gultekin] Dokuz Eylul Univ, Dept Geol Engn, Izmir, Turkey	Dokuz Eylul University	Akar, T (corresponding author), Dokuz Eylul Univ, Dept Geol Engn, Izmir, Turkey.	toygar.akar@deu.edu.tr	Somay-Altas, Melis/G-2890-2017	Somay-Altas, Melis/0000-0001-8451-046X	Department of Scientific Research Project Unit (BAP) of Dokuz Eylul University [KB.FEN.076]	Department of Scientific Research Project Unit (BAP) of Dokuz Eylul University	This research was funded by the Department of Scientific Research Project Unit (BAP) of Dokuz Eylul University with the Project number of 2012.KB.FEN.076.		42	2	2	0	8	Tubitak Scientific & Technological Research Council Turkey	ANKARA	ATATURK BULVARI NO 221, KAVAKLIDERE, TR-06100 ANKARA, TURKIYE	1300-0985			TURK J EARTH SCI	Turk. J. Earth Sci.		2021	30	9
J	Kurzweil, JR; Abdi, R; Stevens, L; Hogue, TS				Kurzweil, Jake R.; Abdi, Reza; Stevens, Larry; Hogue, Terri S.			Utilization of ecological indicators to quantify distribution and conservation status of Mt. Tamalpais Springs, Marin County, California	ECOLOGICAL INDICATORS			English	Article						Springs; Ecohydrology; Ecological management; Geomorphology; Hydrogeology; Indicators		Spring ecosystems are keystone habitats, providing refugia and supporting high levels of ecological biodiversity and productivity. However, they are often overlooked, overdeveloped, or destroyed altogether. Protocol and inventory methods exist that provide detailed and quantified data collection that enable land managers to monitor and assess their ecological indicators. These methods typically r…	[Kurzweil, Jake R.; Abdi, Reza; Hogue, Terri S.] Colorado Sch Mines, Dept Civil & Environm Engn, Hydrol Sci & Engn Program, 1500 Illinois St, Golden, CO 80401 USA; [Stevens, Larry] Springs Stewardship Inst, 3101 N Ft Valley Rd, Flagstaff, AZ 86001 USA	Colorado School of Mines	Kurzweil, JR (corresponding author), Colorado Sch Mines, Dept Civil & Environm Engn, Hydrol Sci & Engn Program, 1500 Illinois St, Golden, CO 80401 USA.	Jkurzweil@mymail.mines.edu			Golden Gate National Parks Conservancy	Golden Gate National Parks Conservancy	This project was supported by funding from the Golden Gate National Parks Conservancy. The authors appreciate Janet Klein, Andrea Williams, and Suzanne Whelan from MMWD, Bree Hardcastle (CDPR) as well as Sharon Farrell and Anna Schlosser (Golden Gate National Parks Conservancy). The first author also appreciates the team of interns, Markus Min, Trevor Perelson, Travis Lang, and Connor Flechsig fo…		57	4	4	0	10	ELSEVIER	AMSTERDAM	RADARWEG 29, 1043 NX AMSTERDAM, NETHERLANDS	1470-160X	1872-7034		ECOL INDIC	Ecol. Indic.	JUN	2021	125
J	Masciale, R; Amalfitano, S; Frollini, E; Ghergo, S; Melita, M; Parrone, D; Preziosi, E; Vurro, M; Zoppini, A; Passarella, G				Masciale, Rita; Amalfitano, Stefano; Frollini, Eleonora; Ghergo, Stefano; Melita, Marco; Parrone, Daniele; Preziosi, Elisabetta; Vurro, Michele; Zoppini, Annamaria; Passarella, Giuseppe			Assessing Natural Background Levels in the Groundwater Bodies of the Apulia Region (Southern Italy)	WATER			English	Article						groundwater; natural background levels; Italian guidelines; pre-selection method	SELENIUM; VALUES; QUALITY; BASIN	Defining natural background levels (NBL) of geochemical parameters in groundwater is a key element for establishing threshold values and assessing the environmental state of groundwater bodies (GWBs). In the Apulia region (Italy), carbonate sequences and clastic sediments host the 29 regional GWBs. In this study, we applied the Italian guidelines for the assessment of the NBLs, implementing the E…	[Masciale, Rita; Vurro, Michele; Passarella, Giuseppe] Natl Res Council IRSA CNR, Water Res Inst, I-70132 Bari, Italy; [Amalfitano, Stefano; Frollini, Eleonora; Ghergo, Stefano; Melita, Marco; Parrone, Daniele; Preziosi, Elisabetta; Zoppini, Annamaria] Natl Res Council IRSA CNR, Water Res Inst, I-00015 Rome, Italy	Consiglio Nazionale delle Ricerche (CNR); Istituto di Ricerca sulle Acque (IRSA-CNR); Consiglio Nazionale delle Ricerche (CNR); Istituto di Ricerca sulle Acque (IRSA-CNR)	Parrone, D (corresponding author), Natl Res Council IRSA CNR, Water Res Inst, I-00015 Rome, Italy.	rita.masciale@cnr.it; amalfitano@irsa.cnr.it; frollini@irsa.cnr.it; ghergo@irsa.cnr.it; melita@irsa.cnr.it; parrone@irsa.cnr.it; preziosi@irsa.cnr.it; michele.vurro@cnr.it; zoppini@irsa.cnr.it; giuseppe.passarella@cnr.it	Passarella, Giuseppe/F-8273-2013; Preziosi, Elisabetta/I-6416-2019; Amalfitano, Stefano/C-6737-2012; Zoppini, Annamaria/J-7458-2016	Passarella, Giuseppe/0000-0001-5101-9826; Preziosi, Elisabetta/0000-0002-7645-2121; Amalfitano, Stefano/0000-0002-6148-1472; Parrone, Daniele/0000-0002-0153-1474; Zoppini, Annamaria/0000-0003-2474-5173; FROLLINI, Eleonora/0000-0003-0304-0481; Melita, Marco/0000-0002-7693-4411; Masciale, Rita/0000-0003-3891-0977	Apulia Region, Regional Department of Water Resources Management	Apulia Region, Regional Department of Water Resources Management	The VIOLA project has been funded by Apulia Region, Regional Department of Water Resources Management, within the frame of the Regional Operational Program (ROP) E.R.D.F.-E.S.F. 2014/2020.		49	12	12	4	16	MDPI	BASEL	ST ALBAN-ANLAGE 66, CH-4052 BASEL, SWITZERLAND		2073-4441		WATER-SUI	Water	APR	2021	13	7
J	Paternoster, M; Buccione, R; Canora, F; Buttitta, D; Panebianco, S; Rizzo, G; Sinisi, R; Summa, V; Mongelli, G				Paternoster, M.; Buccione, R.; Canora, F.; Buttitta, D.; Panebianco, S.; Rizzo, G.; Sinisi, R.; Summa, V; Mongelli, G.			Hydrogeochemistry and Groundwater Quality Assessment in the High Agri Valley (Southern Italy)	GEOFLUIDS			English	Article							SOURCE APPORTIONMENT; IRRIGATION; DRINKING; ORIGIN; WATERS; PRECIPITATION; SUITABILITY; APENNINES; AQUIFERS; CALABRIA	The High Agri Valley (southern Italy) is one of the largest intermontane basin of the southern Apennines affected by intensive agricultural and industrial activities. The study of groundwater chemical features provides much important information useful in water resource management. In this study, hydrogeochemical investigations coupled with multivariate statistics, saturation indices, and stable …	[Paternoster, M.; Buccione, R.; Buttitta, D.; Panebianco, S.; Rizzo, G.; Mongelli, G.] Univ Basilicata, Dept Sci, Viale AteneoLucano 10,Campus Macchia Romana, I-85100 Potenza, Italy; [Paternoster, M.] Natl Inst Geophys & Volcanol INGV, Sect Palermo, I-90153 Palermo, Italy; [Canora, F.] Univ Basilicata, Sch Engn, Viale Ateneo Lucano 10,Campus Macchia Romana, I-85100 Potenza, Italy; [Panebianco, S.…	University of Basilicata; Italfarmaco; Istituto Nazionale Geofisica e Vulcanologia (INGV); University of Basilicata; Consiglio Nazionale delle Ricerche (CNR); Istituto di Metodologie per l'Analisi Ambientale (IMAA-CNR)	Paternoster, M (corresponding author), Univ Basilicata, Dept Sci, Viale AteneoLucano 10,Campus Macchia Romana, I-85100 Potenza, Italy.;Paternoster, M (corresponding author), Natl Inst Geophys & Volcanol INGV, Sect Palermo, I-90153 Palermo, Italy.	michele.paternoster@unibas.it	Buttitta, Dario/HSI-3472-2023; Canora, Filomena/G-5712-2018; Sinisi, Rosa/AAR-2152-2021; Panebianco, Serena/AAB-6812-2022; Paternoster, Michele/L-4636-2016	Buttitta, Dario/0000-0002-2652-262X; Canora, Filomena/0000-0003-1877-4605; Panebianco, Serena/0000-0003-4063-1061; Buccione, Roberto/0000-0003-4264-531X; RIZZO, GIOVANNA/0000-0002-1243-6325; SUMMA, VITO/0000-0002-1345-5683; Paternoster, Michele/0000-0003-0212-0949; MONGELLI, GIOVANNI/0000-0001-8411-2154; Sinisi, Rosa/0000-0003-4439-3419	Italian PRIN-MIUR programme [20174X3P29]; RIL2009-Unibas	Italian PRIN-MIUR programme(Ministry of Education, Universities and Research (MIUR)); RIL2009-Unibas	The authors are indebted to Prof. ssa Giuliana Bianco and Dr. Raffaella Pascale for their support during chemical analysis at University of Basilicata. This research has been supported by a grant (RIL2009-Unibas) of G. Mongelli and M. Paternoster and partially by the project Detection and tracking of crustal fluid by multi-parametric methodolo-gies and technologies of the Italian PRIN-MIUR progra…		61	4	4	3	6	WILEY-HINDAWI	LONDON	ADAM HOUSE, 3RD FL, 1 FITZROY SQ, LONDON, WIT 5HE, ENGLAND	1468-8115	1468-8123		GEOFLUIDS	Geofluids	JUN 25	2021	2021
J	Segadelli, S; Filippini, M; Monti, A; Celico, F; Gargini, A				Segadelli, Stefano; Filippini, Maria; Monti, Anna; Celico, Fulvio; Gargini, Alessandro			Estimation of recharge in mountain hard-rock aquifers based on discrete spring discharge monitoring during base-flow recession	HYDROGEOLOGY JOURNAL			English	Article						Fractured rocks; Italy; Groundwater recharge; Base-flow recession; Power-law correlation	NORTHERN APENNINES; GROUNDWATER RECHARGE; MT. PRINZERA; TURBIDITES; MODEL	Estimation of aquifer recharge is key to effective groundwater management and protection. In mountain hard-rock aquifers, the average annual discharge of a spring generally reflects the vertical aquifer recharge over the spring catchment. However, the determination of average annual spring discharge requires expensive and challenging field monitoring. A power-law correlation was previously report…	[Segadelli, Stefano] Emilia Romagna Reg Adm, Geol Seism & Soil Serv, Viale Fiera 8, I-4027 Bologna, Italy; [Filippini, Maria; Monti, Anna; Gargini, Alessandro] Alma Mater Studiorum Univ Bologna, Dept Biol Geol & Environm Sci, Via Zamboni 67, I-40126 Bologna, Italy; [Celico, Fulvio] Univ Parma, Dept Chem Life Sci & Environm Sustainabil, Parco Area Sci 157-A, I-43124 Parma, Italy	University of Bologna; University of Parma	Filippini, M (corresponding author), Alma Mater Studiorum Univ Bologna, Dept Biol Geol & Environm Sci, Via Zamboni 67, I-40126 Bologna, Italy.	maria.filippini3@unibo.it	Filippini, Maria/AAW-1358-2020	Filippini, Maria/0000-0001-5050-5072; segadelli, stefano/0000-0001-5260-6256; Gargini, Alessandro/0000-0002-9271-219X	Alma Mater Studiorum Universita di Bologna within the CRUI-CARE Agreement	Alma Mater Studiorum Universita di Bologna within the CRUI-CARE Agreement	Open access funding provided by Alma Mater Studiorum Universita di Bologna within the CRUI-CARE Agreement.		52	4	4	0	8	SPRINGER	NEW YORK	ONE NEW YORK PLAZA, SUITE 4600, NEW YORK, NY, UNITED STATES	1431-2174	1435-0157		HYDROGEOL J	Hydrogeol. J.	MAY	2021	29	3
J	Musacchio, A; Mas-Pla, J; Soana, E; Re, V; Sacchi, E				Musacchio, Arianna; Mas-Pla, Josep; Soana, Elisa; Re, Viviana; Sacchi, Elisa			Governance and groundwater modelling: Hints to boost the implementation of the EU Nitrate Directive. The Lombardy Plain case, N Italy	SCIENCE OF THE TOTAL ENVIRONMENT			English	Article						Socio-hydrogeology; Agricultural practices; Backcasting; Soil System Budget; Po plain; Irrigation	MANAGEMENT-PRACTICES; WATER GOVERNANCE; PO RIVER; NORTHERN; CONTAMINATION; CHALLENGES; MITIGATION; EVOLUTION; POLLUTION; INSIGHTS	The EU Nitrate Directive has been ruling for almost 30 years, nevertheless nitrate concentration in the Lombardy Plain did not decrease. Together with failures of management implementation, a possible cause for such field observations is that management actions were taken without adequately considering the actual hydrogeological dynamics. To consider this aspect, the paper presents a groundwater …	[Musacchio, Arianna; Re, Viviana; Sacchi, Elisa] Univ Pavia, Dept Earth & Environm Sci, Via Ferrata 1, I-27100 Pavia, Italy; [Musacchio, Arianna; Mas-Pla, Josep] Univ Girona, Inst Catala Recerca Aigua ICRA, C Amili Grahit 101, Girona 17003, Spain; [Musacchio, Arianna; Mas-Pla, Josep] Univ Girona, Dept Ciencies Ambientals, GAiA Geocamb, C Amili Grahit 101, Girona 17003, Spain; [Soana, Elisa] Univ …	University of Pavia; Institut Catala de Recerca de l'Aigua (ICRA); Universitat de Girona; Universitat de Girona; University of Ferrara; University of Pisa	Musacchio, A (corresponding author), Univ Pavia, Dept Earth & Environm Sci, Via Ferrata 1, I-27100 Pavia, Italy.	arianna.musacchio@gmail.com	Re, Viviana/O-1540-2019; Mas-Pla, Josep/B-9582-2009	Re, Viviana/0000-0001-6002-0159; Mas-Pla, Josep/0000-0002-8491-9895	Cariplo Foundation [2015-0263]; Spanish Research Program [FEDER-MCIU-AEI/CGL2017-87216-C4-4-R]	Cariplo Foundation(Fondazione Cariplo); Spanish Research Program(Spanish Government)	This work was developed in the frame of the project Squaring the cycle: the INTEgration of GROundwater processes in Nutrient budgets for a basin-oriented remediation strategy (INTEGRON), involving the University of Pavia, the CNR-IRSA and the University of Parma, and supported by the Cariplo Foundation (Grant number: 2015-0263). Numerical modelling aims and procedures also benefit from project PA…		80	9	9	5	27	ELSEVIER	AMSTERDAM	RADARWEG 29, 1043 NX AMSTERDAM, NETHERLANDS	0048-9697	1879-1026		SCI TOTAL ENVIRON	Sci. Total Environ.	AUG 15	2021	782
J	Rankoana, SA				Rankoana, Sejabaledi A.			Food security under unreliable rainfall: the case study of a rural community in Limpopo Province, South Africa	JOURNAL OF WATER AND CLIMATE CHANGE			English	Article						climate change; food security; geothermal hot spring; rainfall scarcity; subsistence farming	INDIGENOUS IRRIGATION	The present study assessed the use of a geothermal hot spring water flow as an adaptation practice to improve subsistence crop production. The aim of this study is to contribute towards natural resource use and management as an adaptation measure to the problem of rainfall scarcity in subsistence production. Focus group discussions with 45 subsistence farmers were conducted in a community garden …	[Rankoana, Sejabaledi A.] Univ Limpopo, Dept Sociol & Anthropol, Private Bag X1106, ZA-0727 Sovenga, South Africa	University of Limpopo	Rankoana, SA (corresponding author), Univ Limpopo, Dept Sociol & Anthropol, Private Bag X1106, ZA-0727 Sovenga, South Africa.	sejabaledi.rankoana@ul.ac.za							36	2	2	0	4	IWA PUBLISHING	LONDON	ALLIANCE HOUSE, 12 CAXTON ST, LONDON SW1H0QS, ENGLAND	2040-2244			J WATER CLIM CHANGE	J. Water Clim. Chang.	SEP	2020	11	3
J	Martínez-Valderrama, J; Guirado, E; Maestre, FT				Martinez-Valderrama, Jaime; Guirado, Emilio; Maestre, Fernando T.			Unraveling Misunderstandings about Desertification: The Paradoxical Case of the Tabernas-Sorbas Basin in Southeast Spain	LAND			English	Article						desertification; groundwater; irrigation; olive groves; southern Europe	EROSION; RESPONSES; ALMERIA; COVER; MODEL	From its origins, the concept of desertification has been controversial. The prevailing confusion between two desertification visions, one that considers it as the expansion of deserts and another that emphasizes its anthropogenic component, has been transferred to society. Here we illustrate misunderstandings about desertification using a very illustrative case from the Tabernas-Sorbas Basin (Al…	[Martinez-Valderrama, Jaime; Guirado, Emilio; Maestre, Fernando T.] Univ Alicante, Inst Multidisciplinar Estudio Medio Ramon Margale, Carretera San Vicente Del Raspeig S-N, San Vicente Del Raspeig 03690, Spain; [Maestre, Fernando T.] Univ Alicante, Dept Ecol, Carretera San Vicente Del Raspeig S-N, San Vicente Del Raspeig 03690, Spain	Universitat d'Alacant; Universitat d'Alacant	Martínez-Valderrama, J (corresponding author), Univ Alicante, Inst Multidisciplinar Estudio Medio Ramon Margale, Carretera San Vicente Del Raspeig S-N, San Vicente Del Raspeig 03690, Spain.	jaime.mv@ua.es; e.guirado@ual.es; ft.maestre@gmail.com	Guirado, Emilio/D-2321-2019; Guirado, Emilio/GOG-9161-2022; Maestre, Fernando T./A-6825-2008; Martinez-Valderrama, Jaime/L-1891-2015	Guirado, Emilio/0000-0001-5348-7391; Maestre, Fernando T./0000-0002-7434-4856; Martinez-Valderrama, Jaime/0000-0001-5859-5674	European Research Council [647038]; Generalitat Valenciana [CIDEGENT/2018/041]	European Research Council(European Research Council (ERC)); Generalitat Valenciana(Center for Forestry Research & Experimentation (CIEF))	This research was funded by the European Research Council grant agreement n degrees 647038 (BIODESERT). FTM acknowledges support from Generalitat Valenciana (CIDEGENT/2018/041).		67	13	13	1	12	MDPI	BASEL	ST ALBAN-ANLAGE 66, CH-4052 BASEL, SWITZERLAND		2073-445X		LAND-BASEL	Land	AUG	2020	9	8
J	Ncube, S; Mlunguza, NY; Dube, S; Ramganesh, S; Ogola, HJO; Nindi, MM; Chimuka, L; Madikizela, LM				Ncube, Somandla; Mlunguza, Nomchenge Yamkelani; Dube, Simiso; Ramganesh, Selvarajan; Ogola, Henry Joseph Oduor; Nindi, Mathew Muzi; Chimuka, Luke; Madikizela, Lawrence Mzukisi			Physicochemical characterization of the pelotherapeutic and balneotherapeutic clayey soils and natural spring water at Isinuka traditional healing spa in the Eastern Cape Province of South Africa	SCIENCE OF THE TOTAL ENVIRONMENT			English	Article						Isinuka pond; Port St Johns; Clay; Geophagy; Pelotherapy; Balneotherapy	PORT ST JOHNS; GEOCHEMICAL ANALYSES; PREGNANT-WOMEN; HEALTH-RISK; MINERALS; GEOPHAGY; ELEMENTS; PASTES; MUD; SUITABILITY	Isinuka Springs at Port St Johns in the Eastern Cape Province of South Africa is a traditional spa sacred to the AmaMpondo tribe of the Xhosa speaking people. The bathing pond is considered to have healing powers both spiritually and therapeutically. Hundreds of people flock into the spiritual pond every weekend for both recreational and its spiritual healing power. In this study, we present the …	[Ncube, Somandla; Dube, Simiso; Nindi, Mathew Muzi] Univ South Africa, Dept Chem, Private Bag X6, ZA-1710 Florida, South Africa; [Mlunguza, Nomchenge Yamkelani; Madikizela, Lawrence Mzukisi] Durban Univ Technol, Dept Chem, POB 1334, ZA-4000 Durban, South Africa; [Ramganesh, Selvarajan; Ogola, Henry Joseph Oduor] Univ South Africa, Dept Environm Sci, Private Bag X6, ZA-1710 Florida, South Africa; …	University of South Africa; Durban University of Technology; University of South Africa; University of Witwatersrand	Ncube, S (corresponding author), Univ South Africa, Dept Chem, Private Bag X6, ZA-1710 Florida, South Africa.;Madikizela, LM (corresponding author), Durban Univ Technol, Dept Chem, POB 1334, ZA-4000 Durban, South Africa.	ncubes@unisa.ac.za; lawrencem2@dut.ac.za	Mlunguza, Nomchenge Yamkelani/IQV-7740-2023; Ogola, Henry/N-5904-2017; Ncube, Somandla/HZK-0255-2023; Nindi, Mathew Muzi MM/V-5895-2018; Ncube, Somandla/GLU-9422-2022	Ogola, Henry/0000-0003-1603-6430; Ncube, Somandla/0000-0002-3190-2504; Nindi, Mathew Muzi MM/0000-0001-7222-1505; Mlunguza, Nomchenge/0000-0002-1897-4490; Chimuka, Luke/0000-0002-8552-2478; Madikizela, Lawrence/0000-0001-6096-2701	National Research Foundation of South Africa [114415]; University of South Africa Postdoctoral Fellowship [409000]	National Research Foundation of South Africa(National Research Foundation - South Africa); University of South Africa Postdoctoral Fellowship	This work was funded by the National Research Foundation of South Africa (grant number: 114415) awarded to LM Madikizela and the University of South Africa Postdoctoral Fellowship (grant number: 409000) awarded to S Ncube.		68	2	2	0	10	ELSEVIER	AMSTERDAM	RADARWEG 29, 1043 NX AMSTERDAM, NETHERLANDS	0048-9697	1879-1026		SCI TOTAL ENVIRON	Sci. Total Environ.	MAY 15	2020	717
J	Angelakis, AN; Voudouris, KS; Tchobanoglous, G				Angelakis, A. N.; Voudouris, K. S.; Tchobanoglous, G.			Evolution of water supplies in the Hellenic world focusing on water treatment and modern parallels	WATER SUPPLY			English	Article						ancient Greece; ancient hydraulic technologies; future trends; modern times; urban water systems; water treatment devices	WASTE-WATER; STORMWATER TECHNOLOGIES; MANAGEMENT; GREECE; HISTORY; SANITATION; RESOURCES; REUSE	Advanced, well organized, and operated urban water supply systems existed in Greece from the Bronze Age (ca. 3200-1100 BC). At the dawn of human history, surface water and groundwater, principally springs, were the most common water supply sources. As the population grew, periodic water shortages occurred. In Early Minoan times (ca. 3200-2100 BC), these water shortages led to the development of s…	[Angelakis, A. N.] HAO Demeter, Agr Res Inst Crete, Iraklion 71300, Greece; [Angelakis, A. N.] Union Hellen Water Supply & Sewerage Operators, Larisa 41222, Greece; [Voudouris, K. S.] Aristotle Univ Thessaloniki, Lab Engn Geol & Hydrogeol, Thessaloniki, Greece; [Tchobanoglous, G.] Univ Calif Davis, Dept Civil & Environm Engn, Davis, CA 95616 USA	Aristotle University of Thessaloniki; University of California System; University of California Davis	Voudouris, KS (corresponding author), Aristotle Univ Thessaloniki, Lab Engn Geol & Hydrogeol, Thessaloniki, Greece.	kvoudour@geo.auth.gr							54	8	8	2	23	IWA PUBLISHING	LONDON	ALLIANCE HOUSE, 12 CAXTON ST, LONDON SW1H0QS, ENGLAND	1606-9749	1607-0798		WATER SUPPLY	Water Supply	MAY	2020	20	3
J	Gargini, A; Stefani, A; Vannini, S				Gargini, Alessandro; Stefani, Alessandro; Vannini, Stefano			The groundwater flow system of Terme Alte (Alto Reno Terme, Bologna, Italy).	ACQUE SOTTERRANEE-ITALIAN JOURNAL OF GROUNDWATER			Italian	Article						Porretta Terme; hydrogeology; thermal water; hydrodynamic parametrization; aquifer		The thermal field of Porretta Terme, located in the Alto Reno Terme municipality (Bologna), has always raised interest for its peculiar waters since ancient times. Indeed, the use of the springs dates back to the I-II century A.D. and perhaps even in the Etruscan period. Porretta's thermal tradition has developed over the centuries. First regulation, issued in 1936, allowed to cultivate the miner…	[Stefani, Alessandro] Univ Bologna, Alma Mater Studiorum, Biol Geol & Environm Sci Dept, Bologna, Italy; [Vannini, Stefano] Thermal Field Terme Porretta, Porretta Terme, Italy	University of Bologna	Stefani, A (corresponding author), Univ Bologna, Alma Mater Studiorum, Biol Geol & Environm Sci Dept, Bologna, Italy.	alessandro.stefani7@studio.unibo.it							36	0	0	0	1	PAGEPRESS PUBL	PAVIA	MEDITGROUP, VIA G BELLI, 4, PAVIA, 27100, ITALY	1828-454X			ACQUE SOTTER	Acque Sotter.		2020	9	2
J	Bozdag, A; Ince, I; Bozdag, A; Hatir, ME; Tosunlar, MB; Korkanç, M				Bozdag, Ali; Ince, Ismail; Bozdag, Ayla; Hatir, M. Ergun; Tosunlar, M. Bahadir; Korkanc, Mustafa			An assessment of deterioration in cultural heritage: the unique case of Eflatunpinar Hittite Water Monument in Konya, Turkey	BULLETIN OF ENGINEERING GEOLOGY AND THE ENVIRONMENT			English	Article						Non-destructive tests; Deterioration; Physico-mechanical properties; Eflatunpinar Hittite Water Monument; Building stone	FREEZE-THAW; MECHANICAL-PROPERTIES; BUILDING-MATERIALS; CARBONATE ROCKS; CYCLES; DECAY; VELOCITY; MODEL	Stone monuments are important symbols of cultural heritage of countries. However, many environmental factors negatively affect these monuments. The increasing damage on the stone monuments and the danger of irreversible loss of cultural heritage have resulted in growing efforts for the preservation of the monuments. Eflatunpinar Hittite Water Monument in Beysehir, Konya, Turkey, is a unique Hitti…	[Bozdag, Ali; Ince, Ismail; Bozdag, Ayla] Konya Tech Univ, Fac Engn & Nat Sci, Dept Geol Engn, Konya, Turkey; [Hatir, M. Ergun] Necmettin Erbakan Univ, Fac Fine Arts, Dept Interior Architecture & Environm Design, Konya, Turkey; [Tosunlar, M. Bahadir] Mus Alparslan Univ, Fac Engn & Architecture, Dept Architect, Mus, Turkey; [Korkanc, Mustafa] Nigde Omer Halisdemir Univ, Dept Geol Engn, Fac Engn, N…	Konya Technical University; Necmettin Erbakan University; Mus Alparslan University; Nigde Omer Halisdemir University	Bozdag, A (corresponding author), Konya Tech Univ, Fac Engn & Nat Sci, Dept Geol Engn, Konya, Turkey.	abozdag@ktun.edu.tr	Ergün, Mehmet/AAV-7918-2020; Korkanç, Mustafa/AAE-6933-2020; ince, ismail/AAA-3236-2021	ince, ismail/0000-0002-6692-7584					66	21	21	4	35	SPRINGER HEIDELBERG	HEIDELBERG	TIERGARTENSTRASSE 17, D-69121 HEIDELBERG, GERMANY	1435-9529	1435-9537		B ENG GEOL ENVIRON	Bull. Eng. Geol. Environ.	APR	2020	79	3
J	Martín-Arias, J; Martínez-Santos, P; Andreo, B				Martin-Arias, Javier; Martinez-Santos, Pedro; Andreo, Bartolome			Modelling the effects of climate change and population growth in four intensively exploited Mediterranean aquifers. The Mijas range, southern Spain	JOURNAL OF ENVIRONMENTAL MANAGEMENT			English	Article						Groundwater model; Processing modflow; Climate change; Future scenarios; Karstic aquifer; Fisurated flow system	MANCHA OCCIDENTAL AQUIFER; GROUNDWATER RESOURCES; CARBONATE AQUIFERS; CHANGE IMPACTS; RECHARGE; BASIN; FLOW; VULNERABILITY; MANAGEMENT; DEMAND	Groundwater is key to economic growth in the Mediterranean region. This is particularly true of areas such as southern Spain, where aquifers underpin social development by supplying water to a booming tourist industry. Intensive groundwater use raises sustainability concerns, as pumping often exceeds the long-term recharge rate. Climate change and population growth are likely to exacerbate the wa…	[Martin-Arias, Javier; Andreo, Bartolome] Univ Malaga, Dept Geol, E-29071 Malaga, Spain; [Martin-Arias, Javier; Andreo, Bartolome] Univ Malaga, Ctr Hydrogeol Univ Malaga CEHIUMA, E-29071 Malaga, Spain; [Martinez-Santos, Pedro] Univ Complutense Madrid, Fac Geol Sci, Dept Geodynam Stratig & Palaeontol, UNESCO Chair Appropriate Technol Human Dev, E-28040 Madrid, Spain	Universidad de Malaga; Universidad de Malaga; Complutense University of Madrid	Martín-Arias, J (corresponding author), Univ Malaga CEHIUMA, Dept Geol, Malaga, Spain.;Martín-Arias, J (corresponding author), Univ Malaga CEHIUMA, Ctr Hydrogeol, Malaga, Spain.	j.martin@uma.es; pemartin@ucm.es; andreo@uma.es	martinez-santos, pedro/AFP-6982-2022	martinez-santos, pedro/0000-0003-2014-4063	University of Malaga [8.06/5.44.4100]; Ministerio de Economia y Empresas (MINECO) [CGL 2015-65858R]; Junta de Andalucia [RNM-308]	University of Malaga(University of Malaga); Ministerio de Economia y Empresas (MINECO); Junta de Andalucia(Junta de Andalucia)	This paper was funded under projects 8.06/5.44.4100 of the University of Malaga, CGL 2015-65858R of the Ministerio de Economia y Empresas (MINECO), and the Research Group RNM-308 of the Junta de Andalucia. The authors would also like to thank to water supply companies of Alhaurin de la Torre, Torremolinos and Benalm.adena, as well as the farmers and groundwater users of the Mijas range for their …		49	5	5	0	15	ACADEMIC PRESS LTD- ELSEVIER SCIENCE LTD	LONDON	24-28 OVAL RD, LONDON NW1 7DX, ENGLAND	0301-4797	1095-8630		J ENVIRON MANAGE	J. Environ. Manage.	MAY 15	2020	262
J	Guitián, MAR; Real, C; Ramil-Rego, P; Franco, RR; Castro, HL				Rodriguez Guitian, Manuel A.; Real, Carlos; Ramil-Rego, Pablo; Romero Franco, Rosa; Lopez Castro, Hugo			Characteristics, vulnerability and conservation value of active tufa-forming springs on coastal cliffs in the NW Iberian Peninsula	OCEAN & COASTAL MANAGEMENT			English	Article						Atlantic biogeographical region; Littoral cliffs; Bryo-pteridophitic communities; CD 92/43/EEC; Hard-water springs	TRAVERTINE DEPOSITS; ASTURIAS; POACEAE; SYSTEM; BASIN	Tufa-forming hard water springs are classified as a priority natural habitat of community interest and described in Annex I of Community Directive 92/43/EEC as (Natura, 2000 habitat type 7220* Petrifying springs with tufa formation [Cratoneurion]). This type of habitat is scarce along the European Atlantic coast. In this study, petrifying springs in 36 coastal locations in the NW Iberian Peninsul…	[Rodriguez Guitian, Manuel A.] Univ Santiago de Compostela, Escola Politecn Super Enxenaria, Dept Prod Vexetal & Proxectos Enxenaria, GI Terr & Biodiversidade 1934, Lugo 27004, Galicia, Spain; [Real, Carlos] Univ Santiago de Compostela, Escola Politecn Super Enxenaria, Dept Biol Func, Lugo 27004, Galicia, Spain; [Ramil-Rego, Pablo; Lopez Castro, Hugo] Rural Univ Santiago de Compostela, Inst Biodi…	Universidade de Santiago de Compostela; Universidade de Santiago de Compostela; Universidade de Santiago de Compostela	Guitián, MAR (corresponding author), Univ Santiago de Compostela, Escola Politecn Super Enxenaria, Dept Prod Vexetal & Proxectos Enxenaria, GI Terr & Biodiversidade 1934, Lugo 27004, Galicia, Spain.	manuelantonio.rodriguez@usc.es	Real, Carlos/I-1542-2015	Real, Carlos/0000-0002-5433-6728					69	4	4	2	8	ELSEVIER SCI LTD	OXFORD	THE BOULEVARD, LANGFORD LANE, KIDLINGTON, OXFORD OX5 1GB, OXON, ENGLAND	0964-5691	1873-524X		OCEAN COAST MANAGE	Ocean Coastal Manage.	MAY 1	2020	189
S	Yazicigil, H; Ekmekci, M		Harmancioglu, NB; Altinbilek, D		Yazicigil, Hasan; Ekmekci, Mehmet			Groundwater	WATER RESOURCES OF TURKEY	World Water Resources		English	Article; Book Chapter						Turkish groundwater; Turkish aquifers; Safe yield; Sustainable yield; Groundwater management	MANAGEMENT; ANATOLIA	About 18% of the total water resources potential of Turkey is made up of groundwater resources. Significant portion of the streamflow of major rivers is supplied by groundwater through springs and baseflow. In 1960s and early 1970s, the financial capacity of Turkey did not allow construction of large dams for irrigation. Development of groundwater resources in alluvial plain aquifers where the ag…	[Yazicigil, Hasan] Middle East Tech Univ, Dept Geol Engn, Ankara, Turkey; [Ekmekci, Mehmet] Hacettepe Univ, Hydrogeol Engn Program, Ankara, Turkey; [Ekmekci, Mehmet] Hacettepe Univ, Int Res Ctr Karst Water Resources, Ankara, Turkey	Middle East Technical University; Hacettepe University; Hacettepe University	Yazicigil, H (corresponding author), Middle East Tech Univ, Dept Geol Engn, Ankara, Turkey.	hyazici@metu.edu.tr; ekmekci@hacettepe.edu.tr	EKMEKCI, Mehmet/ABC-9363-2020; , Hasan/AAT-2055-2021						46	2	3	1	18	SPRINGER INTERNATIONAL PUBLISHING AG	CHAM	GEWERBESTRASSE 11, CHAM, CH-6330, SWITZERLAND	2509-7385	2509-7393	978-3-030-11729-0; 978-3-030-11728-3	WOR WATER RESOUR			2020	2
J	Martos-Rosillo, S; González-Ramón, A; Ruiz-Constán, A; Marín-Lechado, C; Guardiola-Albert, C; Martos, FM; Jódar, J; Parias, AP				Martos-Rosillo, Sergio; Gonzalez-Ramon, Antonio; Ruiz-Constan, Ana; Marin-Lechado, Carlos; Guardiola-Albert, Carolina; Moral Martos, Francisco; Jodar, Jorge; Pedrera Parias, Antonio			Water management in the high mountain watersheds of the Sierra Nevada National Park (southern Spain). An example of ancestral Integrated Water Management	BOLETIN GEOLOGICO Y MINERO			Spanish	Article								Sierra Nevada is the main mountain range in the southern Iberian Peninsula and has been catalogued as a Biosphere Reserve (1986), a Natural Park (1989) and a National Park (1999). Apart from its ecological, geomorphological and landscape singularities, there are other remarkable hydrological, historical and cultural features, such as the ancestral water management performed at the headwaters of t…	[Martos-Rosillo, Sergio; Gonzalez-Ramon, Antonio; Ruiz-Constan, Ana; Marin-Lechado, Carlos] Inst Geol & Minero Espana, Urbanizac Alcazar del Genil 4, Granada 18006, Spain; [Guardiola-Albert, Carolina] Inst Geol & Minero Espana, C Rios Rosas 23, Madrid 28003, Spain; [Moral Martos, Francisco] Univ Pablo Olavide Sevilla, Carretera Utrera,Km 1, Seville 41013, Spain; [Jodar, Jorge] Inst Geol & Minero …	Universidad Pablo de Olavide	Martos-Rosillo, S (corresponding author), Inst Geol & Minero Espana, Urbanizac Alcazar del Genil 4, Granada 18006, Spain.	s.martos@igme.es; antonio.gonzalez@igme.es; a.ruiz@igme.es; c.marin@igme.es; c.guardiola@igme.es; fmormar@upo.es; j.jodar@igme.es; a.pedrera@igme.es	Jódar, Jorge/E-6457-2017; RUIZ-CONSTÁN, ANA/L-4634-2014; Pedrera, Antonio/L-6463-2014	Jódar, Jorge/0000-0001-8708-0303; RUIZ-CONSTÁN, ANA/0000-0002-0920-6369; Pedrera, Antonio/0000-0003-1990-9292					0	1	1	1	6	INST GEOLOGICA MINERO ESPANA	MADRID	MUSEO GEOMINERO, RIOS ROSAS, NO 23, MADRID, 28003, SPAIN	0366-0176	2253-6167		BOL GEOL MIN	Bol. Geol. Min.	OCT-DEC	2019	130	4
J	Munteanu, C; Munteanu, D; Hoteteu, M; Dogaru, G				Munteanu, Constantin; Munteanu, Diana; Hoteteu, Mihail; Dogaru, Gabriela			Balneotherapy - medical, scientific, educational and economic relevance reflected by more than 250 articles published in Balneo Research Journal	BALNEO RESEARCH JOURNAL			English	Article						Balneology; Balneotherapy; Balneo Research Journal; Natural therapeutic factors; Balneary Resort	NATURAL THERAPEUTIC FACTORS; ARTIFICIAL AIR IONIZATION; UPPER-LIMB REHABILITATION; CARBONATED MINERAL-WATER; CANCER-RELATED FATIGUE; PULSED SHORT WAVES; QUALITY-OF-LIFE; BAILE TUSNAD; ISCHEMIC-STROKE; SPRING 3	Introduction. Balneology has a long European and Asian tradition and Romania can be the cornerstone of international bridges in this area due to its geographical position, legendary tradition and extraordinary natural resources of all kind. The use of thermal and mineral springs on the territory of the country for health and treatment purposes is a tradition with a history of more than two thousa…	[Munteanu, Constantin; Munteanu, Diana; Hoteteu, Mihail; Dogaru, Gabriela] Romanian Assoc Balneol, Bucharest, Romania; [Munteanu, Constantin] Emergency Clin Hosp Bagdasar Arseni, Bucharest, Romania; [Munteanu, Diana] Natl Inst Rehabil Phys Med & Balneoclimatol, Bucharest, Romania; [Hoteteu, Mihail] Biosafety LTD, Bucharest, Romania; [Dogaru, Gabriela] Iuliu Hatieaganu Med & Pharm Univ, Cluj Napoc…		Munteanu, C (corresponding author), Romanian Assoc Balneol, Bucharest, Romania.;Munteanu, C (corresponding author), Emergency Clin Hosp Bagdasar Arseni, Bucharest, Romania.	office@bioclima.ro	Munteanu, Constantin/ACM-9541-2022; Constantin, Munteanu/GYV-5952-2022	Munteanu, Constantin/0000-0002-1084-7710;					249	16	17	1	17	ROMANIAN ASSOC BALNEOLOGY	BUCHAREST	BUCHAREST, SECTOR 2, ALEEA DOBRINA NO 7, BL D10, SC A, AP 4, BUCHAREST, 00000, ROMANIA	2069-7597	2069-7619		BALNEO RES J	Balneo Res. J.	SEP	2019	10	3
J	Brosnan, T; Becker, MW; Lipo, CP				Brosnan, Tanya; Becker, Matthew W.; Lipo, Carl P.			Coastal groundwater discharge and the ancient inhabitants of Rapa Nui (Easter Island), Chile	HYDROGEOLOGY JOURNAL			English	Article						Easter Island; Submarine groundwater discharge; Coastal aquifers; Volcanic aquifer; Island hydrology	SALTWATER INTRUSION; COLONIZATION; MANAGEMENT; SETTLEMENT; AQUIFERS; HISTORY; REGIONS; MODEL; MOAI; SGD	The population of Rapa Nui (Easter Island) in pre-historic time is believed to have numbered in the thousands although typical perennial sources of drinking water (streams, springs) are nearly absent from the island. From the accounts of early European explorers, it is known that the people of Rapa Nui utilized brackish drinking water. Beyond this, almost nothing is known of the water resources i…	[Brosnan, Tanya; Becker, Matthew W.] Calif State Univ Long Beach, Dept Geol Sci, 1250 Bellflower Blvd, Long Beach, CA 90840 USA; [Brosnan, Tanya] Calif Dept Tox Subst Control, Sacramento, CA USA; [Lipo, Carl P.] SUNY Binghamton, Dept Anthropol, 4400 Vestal Pkwy East, Binghamton, NY 13902 USA	California State University System; California State University Long Beach; State University of New York (SUNY) System; State University of New York (SUNY) Binghamton	Lipo, CP (corresponding author), SUNY Binghamton, Dept Anthropol, 4400 Vestal Pkwy East, Binghamton, NY 13902 USA.	clipo@binghamton.edu	Lipo, Carl/C-9154-2013; Becker, Matthew W/J-2711-2012	Lipo, Carl/0000-0003-4391-3590;	NSF [1005258]; Bert and Ethel Conrey Endowed Chair in Hydrogeology; SBE Off Of Multidisciplinary Activities; Direct For Social, Behav & Economic Scie [1005258] Funding Source: National Science Foundation	NSF(National Science Foundation (NSF)); Bert and Ethel Conrey Endowed Chair in Hydrogeology; SBE Off Of Multidisciplinary Activities; Direct For Social, Behav & Economic Scie(National Science Foundation (NSF)NSF - Directorate for Social, Behavioral & Economic Sciences (SBE))	The fieldwork was supported by NSF Award No. 1005258 Geospatial Research and Mapping on Easter Island (Co-PIs: Christopher Lee, California State University Long Beach, Carl Lipo, Binghamton University and Terry Hunt, University of Arizona) and the Bert and Ethel Conrey Endowed Chair in Hydrogeology.		79	18	18	0	13	SPRINGER	NEW YORK	233 SPRING ST, NEW YORK, NY 10013 USA	1431-2174	1435-0157		HYDROGEOL J	Hydrogeol. J.	MAR	2019	27	2
J	Dunyach, I				Dunyach, Ingrid			SACRED SPACE AND RITUAL PRACTICES AROUND ROCHER- SOURCE The case of the source of the Fajouse at the top of the Pyrenees (late 6th-late 3rd century BC)	ETUDES CLASSIQUES			French	Article								Excavations carried out from 2013 to 2015 on the site of la Fajouse have brought to light cultural practices around a spring located in the mountains, on the border between France and Spain, above the plains of Emporion and Rhode (6th cent. BC - 6th cent. AD). After the description of the site environment, the findings in and near the spring basin are presented for the first two phases of occupat…	[Dunyach, Ingrid] Univ Perpignan Via Domitia, CRESEM EA 7397, Labex Archimede, Perpignan, France		Dunyach, I (corresponding author), Univ Perpignan Via Domitia, CRESEM EA 7397, Labex Archimede, Perpignan, France.	dunyach.ingrid@club-internet.fr							70	0	0	0	0	SOC ETUDES CLASSIQUES	NAMUR	61 RUE DE BRUXELLES, B-5000 NAMUR, BELGIUM	0014-200X			ETUD CLASSIQUES	Etud. Class.		2019	87	1-3
J	Saroli, M; Lancia, M; Petitta, M				Saroli, Michele; Lancia, Michele; Petitta, Marco			The geology and hydrogeology of the Cassino plain (central Apennines, Italy): redefining the regional groundwater balance	HYDROGEOLOGY JOURNAL			English	Article						Conceptual model; Groundwater management; Italy; Karst; Tectonics		Cassino plain is a Quaternary intermontane basin of the central-southern Apennines, Italy. The plain has outstanding groundwater resources (total discharge of 23,000 L/s), thanks to the huge karst basins that surround the area. The area has been involved in many hydrogeological interests since the 1970s due to the economic importance and construction of the Western Campania Aqueduct for the water…	[Saroli, Michele] Univ Cassino & Lazio Meridionale, Dipartimento Ingn Civile & Meccan, Via G Di Biasio 43, I-03043 Cassino, Italy; [Lancia, Michele] Southern Univ Sci & Technol, Sch Environm Sci & Engn, Guangdong Prov Key Lab Soil & Groundwater Pollut, Shenzhen 518055, Peoples R China; [Lancia, Michele] Southern Univ Sci & Technol, Sch Environm Sci & Engn, State Environm Protect Key Lab Integrate…	University of Cassino; Southern University of Science & Technology; Southern University of Science & Technology; Sapienza University Rome	Lancia, M (corresponding author), Southern Univ Sci & Technol, Sch Environm Sci & Engn, Guangdong Prov Key Lab Soil & Groundwater Pollut, Shenzhen 518055, Peoples R China.;Lancia, M (corresponding author), Southern Univ Sci & Technol, Sch Environm Sci & Engn, State Environm Protect Key Lab Integrated Surface, Shenzhen 518055, Peoples R China.	lancia@sustc.edu.cn	Petitta, Marco/D-3848-2009; Lancia, Michele/AAM-3275-2020	Petitta, Marco/0000-0003-1137-6137; Lancia, Michele/0000-0002-4862-5179					42	3	3	0	6	SPRINGER	NEW YORK	ONE NEW YORK PLAZA, SUITE 4600, NEW YORK, NY, UNITED STATES	1431-2174	1435-0157		HYDROGEOL J	Hydrogeol. J.	AUG	2019	27	5
J	Piccini, L; Di Lorenzo, T; Costagliola, P; Galassi, DMP				Piccini, Leonardo; Di Lorenzo, Tiziana; Costagliola, Pilario; Galassi, Diana Maria Paola			Marble Slurry's Impact on Groundwater: The Case Study of the Apuan Alps Karst Aquifers	WATER			English	Article						groundwater; karst aquifer; pollution; quarry; Apuan Alps	ECOSYSTEM SERVICES; PATTERNS; CAVE; INVERTEBRATES; BIODIVERSITY; ENVIRONMENT; FAUNA; DIVERSITY; CRUSTACEA; POLLUTION	Modern sawing techniques employed in ornamental stones' exploitation produce large amounts of slurry that can be potentially diffused into the environment by runoff water. Slurry produced by limestone and marble quarrying can impact local karst aquifers, negatively affecting the groundwater quality and generating a remarkable environmental and economic damage. A very representative case-study is …	[Piccini, Leonardo; Costagliola, Pilario] Univ Florence, Dept Earth Sci, I-50121 Florence, Italy; [Di Lorenzo, Tiziana] CNR, Natl Res Council Italy, Res Inst Terr Ecosyst, I-50019 Florence, Italy; [Galassi, Diana Maria Paola] Univ Aquila, Dept Life Hlth & Environm Sci, I-67100 Laquila, Italy	University of Florence; Consiglio Nazionale delle Ricerche (CNR); Istituto di Ricerca sugli Ecosistemi Terrestri (IRET); University of L'Aquila	Piccini, L (corresponding author), Univ Florence, Dept Earth Sci, I-50121 Florence, Italy.	leonardo.piccini@unifi.it; tiziana.dilorenzo@cnr.it; pilario.costagliola@unifi.it; dianamariapaola.galassi@univaq.it	Di Lorenzo, Tiziana/F-1544-2013; Galassi, Diana M.P./N-1674-2015	Di Lorenzo, Tiziana/0000-0002-3131-7049; Piccini, Leonardo/0000-0003-3892-050X; Galassi, Diana M.P./0000-0002-6448-2710; , Tiziana/0000-0003-2060-8294	European commission [LIFE12 BIO/IT/000231]	European commission(European Union (EU)European Commission Joint Research Centre)	This research was partially funded by the AQUALIFE project LIFE12 BIO/IT/000231 Development of an innovative and user-friendly indicator system for biodiversity in groundwater dependent ecosystems of the European commission.		56	17	17	1	11	MDPI	BASEL	ST ALBAN-ANLAGE 66, CH-4052 BASEL, SWITZERLAND		2073-4441		WATER-SUI	Water	DEC	2019	11	12
J	Giacopetti, M; Materazzi, M; Pambianchi, G; Posavec, K				Giacopetti, Marco; Materazzi, Marco; Pambianchi, Gilberto; Posavec, Kristijan			A combined approach for a modern hydrogeological mapping: the case study of Tennacola stream catchment (central Apennine, Italy)	JOURNAL OF MAPS			English	Article						Hydrogeological mapping; spring protection zones; central Italy	GROUNDWATER RECHARGE; PROTECTION ZONES; IMPLEMENTATION; RESOURCES; EXAMPLE; KARST	The current European water legislation, specifically the one addressed to groundwater for human consumption (EU Water Framework Directive, WFD-2000/60/EC), provides clear indications on the objectives and actions to be taken for the proper management and protection of water resources. In Italy, as well as in other countries of the EU, the implementation of this Directive, in the face of an adjust…	[Giacopetti, Marco; Materazzi, Marco; Pambianchi, Gilberto] Univ Camerino, Sch Sci & Technol, Camerino, Italy; [Posavec, Kristijan] Univ Zagreb, Dept Geol & Geol Engn, Zagreb, Croatia	University of Camerino; University of Zagreb	Giacopetti, M (corresponding author), Univ Camerino, Sch Sci & Technol, Camerino, Italy.	marco.giacopetti@unicam.it	Posavec, Kristijan/AAL-9109-2020; MATERAZZI, Marco/AAW-9303-2020	Posavec, Kristijan/0000-0002-5392-9329; MATERAZZI, Marco/0000-0002-9480-5680; Giacopetti, Marco/0000-0002-3066-564X					37	2	2	0	1	TAYLOR & FRANCIS LTD	ABINGDON	2-4 PARK SQUARE, MILTON PARK, ABINGDON OR14 4RN, OXON, ENGLAND	1744-5647			J MAPS	J. Maps	JUL 3	2019	15	2
J	Di Carlo, C; Lepore, L; Venoso, G; Ampollini, M; Carpentieri, C; Tannino, A; Ragno, E; Magliano, A; D'Amario, C; Remetti, R; Bochicchio, F				Di Carlo, C.; Lepore, L.; Venoso, G.; Ampollini, M.; Carpentieri, C.; Tannino, A.; Ragno, E.; Magliano, A.; D'Amario, C.; Remetti, R.; Bochicchio, F.			Radon concentration in self-bottled mineral spring waters as a possible public health issue	SCIENTIFIC REPORTS			English	Article							DRINKING-WATER	Since 2013, the Council Directive 2013/51/Euratom has been regulating the content of radioactive substances in water intended for human consumption. However, mineral waters are exempted from this regulation, including self-bottled springs waters, where higher radon concentration are expected. Therefore, a systematic survey has been conducted on all the 33 mineral spring waters of Lazio (a region …	[Di Carlo, C.; Venoso, G.; Ampollini, M.; Carpentieri, C.; Bochicchio, F.] Italian Natl Inst Hlth, Natl Ctr Radiat Protect & Computat Phys, Viale Regina Elena 299, I-00161 Rome, Italy; [Lepore, L.; Tannino, A.; Remetti, R.] Sapienza Univ Rome, Dept Basic & Appl Sci Engn, Via Antonio Scarpa 14, I-00161 Rome, Italy; [Ragno, E.] Natl Res Council CNR, Prevent & Protect Serv Off, Ple A Moro 7, I-00185…	Istituto Superiore di Sanita (ISS); Sapienza University Rome	Di Carlo, C (corresponding author), Italian Natl Inst Hlth, Natl Ctr Radiat Protect & Computat Phys, Viale Regina Elena 299, I-00161 Rome, Italy.	christian.dicarlo@iss.it	Carpentieri, Carmela/E-2137-2015; VENOSO, GENNARO/E-2139-2015; LEPORE, LUIGI/M-6060-2017	Carpentieri, Carmela/0000-0002-2994-0317; VENOSO, GENNARO/0000-0002-2855-6831; LEPORE, LUIGI/0000-0003-0088-6449; Di Carlo, Christian/0000-0002-6629-7658					25	8	8	2	7	NATURE PUBLISHING GROUP	LONDON	MACMILLAN BUILDING, 4 CRINAN ST, LONDON N1 9XW, ENGLAND	2045-2322			SCI REP-UK	Sci Rep	OCT 3	2019	9
J	Zanini, A; Petrella, E; Sanangelantoni, AM; Angelo, L; Ventosi, B; Viani, L; Rizzo, P; Remelli, S; Bartoli, M; Bolpagni, R; Chelli, A; Feo, A; Francese, R; Iacumin, P; Menta, C; Racchetti, E; Selmo, EM; Tanda, MG; Ghirardi, M; Boggio, P; Pappalardo, F; De Nardo, MT; Segadelli, S; Celico, F				Zanini, Andrea; Petrella, Emma; Sanangelantoni, Anna Maria; Angelo, Letizia; Ventosi, Beatrice; Viani, Luca; Rizzo, Pietro; Remelli, Sara; Bartoli, Marco; Bolpagni, Rossano; Chelli, Alessandro; Feo, Alessandra; Francese, Roberto; Iacumin, Paola; Menta, Cristina; Racchetti, Erica; Selmo, Enrico Maria; Tanda, Maria Giovanna; Ghirardi, Marco; Boggio, Pietro; Pappalardo, Francesco; De Nardo, Maria Te…			Groundwater characterization from an ecological and human perspective: an interdisciplinary approach in the Functional Urban Area of Parma, Italy	RENDICONTI LINCEI-SCIENZE FISICHE E NATURALI			English	Article; Proceedings Paper	Conference on Foreseeing Groundwater Resources	MAR 22, 2018	Accademia Nazl Lincei, Rome, ITALY		Accademia Nazl Lincei	Groundwater characterization; Alluvial plain; Shallow aquifer system; Interdisciplinary approach; Functional Urban Area	PLANT DIVERSITY; DISTRIBUTION PATTERNS; CARBONATE AQUIFERS; CONTAMINANT SOURCE; LOWLAND SPRINGS; OGLIO RIVER; PO PLAIN; NORTHERN; WATER; SUCCESSIONS	Inthe Parma Functional Urban Area,hydro-geo-ecology was investigated through an interdisciplinary approach, with emphasis on the shallow aquifer system. The study pointed out that domestic wells and fontanili are both fed by shallow groundwater affected by PCE and nitrate contamination, upgradient of the rural area located north of Parma City. Moreover, Folsomia candida tests suggested the possib…	[Zanini, Andrea; Angelo, Letizia; Tanda, Maria Giovanna] Univ Parma, Dept Engn & Architecture, Parma, Italy; [Petrella, Emma; Sanangelantoni, Anna Maria; Ventosi, Beatrice; Viani, Luca; Rizzo, Pietro; Remelli, Sara; Bartoli, Marco; Bolpagni, Rossano; Chelli, Alessandro; Feo, Alessandra; Francese, Roberto; Iacumin, Paola; Menta, Cristina; Racchetti, Erica; Selmo, Enrico Maria; Celico, Fulvio] Univ…	University of Parma; University of Parma; Consiglio Nazionale delle Ricerche (CNR); Istituto per lo Studio degli Ecosistemi (ISE-CNR)	Petrella, E (corresponding author), Univ Parma, Dept Chem Life Sci & Environm Sustainabil, Parma, Italy.	emma.petrella@unipr.it	Zanini, Andrea/M-1389-2014; Chelli, Alessandro/S-2851-2017; Remelli, Sara/AAI-3149-2020; Tanda, Maria Giovanna/M-1761-2014; Iacumin, Paola/AAV-8855-2021; Petrella, Emma/A-5682-2008; Bolpagni, Rossano/Q-7053-2018; Remelli, Sara/HTN-0961-2023	Zanini, Andrea/0000-0002-4022-707X; Chelli, Alessandro/0000-0001-5035-733X; Remelli, Sara/0000-0001-6816-0850; Petrella, Emma/0000-0002-4292-8814; Bolpagni, Rossano/0000-0001-9283-2821; Remelli, Sara/0000-0001-6816-0850; Tanda, Maria Giovanna/0000-0002-8357-1348; sanangelantoni, anna maria/0000-0003-4764-3436; Feo, Alessandra/0000-0002-3332-2490; segadelli, stefano/0000-0001-5260-6256; Rizzo, Pie…	UE (INTERREG Central Europe) via the AMIIGA Project	UE (INTERREG Central Europe) via the AMIIGA Project	The research was supported by UE (INTERREG Central Europe) via the AMIIGA Project. The authors would like to thank Prof. Antonio Longinelli and another anonymous reviewer for their fruitful comments.		60	19	19	0	7	SPRINGER-VERLAG ITALIA SRL	MILAN	VIA DECEMBRIO, 28, MILAN, 20137, ITALY	2037-4631	1720-0776		REND LINCEI-SCI FIS	Rend. Lincei.-Sci. Fis. Nat.	MAR	2019	30	1
J	Murillo, JM; Vega, L				Manuel Murillo, Jose; Vega, Leticia			Groundwater and Protected Natural Areas in Spain. The hydrogeological characterization of National Parks	BOLETIN GEOLOGICO Y MINERO			Spanish	Article								This study identifies protected natural areas that are related to groundwater in Spain. The methodology used has been applied to the natural areas covered within the scope of the three legal frameworks established in Law 42/2007, 13 December 2007 on Natural Heritage and Biodiversity. These are as follows: (a) areas protected by the Spanish State or its Autonomous Communities; (b) areas protected …	[Manuel Murillo, Jose; Vega, Leticia] Inst Geol & Minero Espana, Rios Rosas 23, Madrid 28003, Spain		Murillo, JM (corresponding author), Inst Geol & Minero Espana, Rios Rosas 23, Madrid 28003, Spain.	jm.murillo@igme.es; l.vega@igme.es	Murillo, Juan M/L-3838-2014	Murillo, Juan M/0000-0003-4961-4030					0	2	2	0	5	INST GEOLOGICA MINERO ESPANA	MADRID	MUSEO GEOMINERO, RIOS ROSAS, NO 23, MADRID, 28003, SPAIN	0366-0176	2253-6167		BOL GEOL MIN	Bol. Geol. Min.	OCT-DEC	2019	130	4
J	Mokadem, N; Redhaounia, B; Besser, H; Ayadi, Y; Khelifi, F; Hamad, A; Hamed, Y; Bouri, S				Mokadem, Naziha; Redhaounia, Belgacem; Besser, Houda; Ayadi, Yosra; Khelifi, Faten; Hamad, Amor; Hamed, Younes; Bouri, Salem			Impact of climate change on groundwater and the extinction of ancient Foggara and springs systems in arid lands in North Africa: a case study in Gafsa basin (Central of Tunisia)	EURO-MEDITERRANEAN JOURNAL FOR ENVIRONMENTAL INTEGRATION			English	Article						Overexploitation; Groundwater; Mkayel; Arid lands; Gafsa basin; Tunisia	WATER-RESOURCES; QANATS; IRRIGATION; OMAN	The rising increase in groundwater abstraction to serve the industrial sector and to fulfill the agricultural and domestic needs, coupled with severe drought periods during the past decades, leads to a growing deficit of water. The drawdown of piezometric levels and progressing degradation of water quality are the main consequences of such intensive exploitation. In this connection, the present s…	[Mokadem, Naziha; Bouri, Salem] Natl Engineers Coll Sfax Tunisia ENIS, Water Energy & Environm Lab L3E, St Soukra Km 3-5, Sfax 3038, Tunisia; [Redhaounia, Belgacem] Water Res & Technol Ctr Borj Cedria CERTE, Georesources Lab, BP 273, Soliman 8020, Tunisia; [Besser, Houda; Ayadi, Yosra; Khelifi, Faten; Hamed, Younes] Fac Sci Gafsa, Res Unity Water Energy & Climate, Gafsa, Tunisia; [Hamad, Amor] Fa…	Universite de Sfax; Ecole Nationale dIngenieurs de Sfax (ENIS); Universite de Gafsa; Universite de Carthage	Redhaounia, B (corresponding author), Water Res & Technol Ctr Borj Cedria CERTE, Georesources Lab, BP 273, Soliman 8020, Tunisia.;Redhaounia, B (corresponding author), Int Assoc Water Resources, Gafsa, Tunisia.	nazouhmoka@gmail.com; belgacem.redhaounia@yahoo.fr; besserhouda@gmail.com; ayadiyosraa@yahoo.fr; fatenkhlifi@outlook.com; hsamir2001@gmail.com; hamed_younes@yahoo.fr; bouri.salem@yahoo.fr	khelifi, faten/ABG-4791-2020; Hamed, Younes/ABC-6660-2021; Bouri, Salem/AAD-9439-2019; Mokadem, Naziha/AAR-9306-2020	khelifi, faten/0000-0001-8348-6525; Mokadem, Naziha/0000-0003-1252-0495					65	31	31	0	3	SPRINGER HEIDELBERG	HEIDELBERG	TIERGARTENSTRASSE 17, D-69121 HEIDELBERG, GERMANY	2365-6433	2365-7448		EURO-MEDITERR J ENVI	Euro-Mediterr. J. Environ. Integrat.	NOV	2018	3	1
J	De Graff, JV; Pluhar, CJ; Gallegos, AJ; Takenaka, K; Platt, B				De Graff, Jerome V.; Pluhar, Christopher J.; Gallegos, Alan J.; Takenaka, Kellen; Platt, Bryant			Monitoring Thermal Springs to Improve Land Management Decision-Making, Sierra Nevada, California	ENVIRONMENTAL & ENGINEERING GEOSCIENCE			English	Article						Thermal Springs; Land-Use Planning; Site Investigation; Hydrogeology; Sierra Nevada; California	LONG VALLEY CALDERA; EASTERN CALIFORNIA; TECTONIC IMPLICATIONS; MAMMOTH MOUNTAIN; FAULT SYSTEM; WALKER LANE; RANGE; DELAMINATION; DEFORMATION; EVOLUTION	The Sierra National Forest administers Mono Hot Springs and other nearby geothermal features, a concentration of more than a dozen springs, pools, and seeps in the high SierraNevada, California. The Native American Mono Tribe traditionally uses Mono Hot Springs for spiritual purposes, while simultaneously the Mono Hot Springs Resort holds a special-use permit for some of the geothermal waters. To…	[De Graff, Jerome V.; Pluhar, Christopher J.; Platt, Bryant] Calif State Univ Fresno, Dept Earth & Environm Sci, 2576 East San Ramon Ave,Mail Stop ST-24, Fresno, CA 93740 USA; [Gallegos, Alan J.; Takenaka, Kellen] US Forest Serv, USDA, 1600 Tollhouse Rd, Clovis, CA 93611 USA	California State University System; California State University Fresno; United States Department of Agriculture (USDA); United States Forest Service	De Graff, JV (corresponding author), Calif State Univ Fresno, Dept Earth & Environm Sci, 2576 East San Ramon Ave,Mail Stop ST-24, Fresno, CA 93740 USA.	jdegraff@csufresno.edu		Pluhar, Christopher/0000-0003-2464-0865					68	0	0	0	3	GEOLOGICAL SOC AMER, INC	BOULDER	PO BOX 9140, BOULDER, CO 80301-9140 USA	1078-7275	1558-9161		ENVIRON ENG GEOSCI	Environ. Eng. Geosci.	MAY	2018	24	2
S	Erfurt-Cooper, P		Fearnley, CJ; Bird, DK; Haynes, K; McGuire, WJ; Jolly, G		Erfurt-Cooper, Patricia			Active Hydrothermal Features as Tourist Attractions	OBSERVING THE VOLCANO WORLD: VOLCANO CRISIS COMMUNICATION	Advances in Volcanology		English	Article; Book Chapter						Hydrothermal activity; Protected site status; Risk management; Sustainable tourism; Volcanic environments	COMMUNICATION; HAZARDS; VOLCANO; RISK	Tourists are looking increasingly for adventurous experiences by exploring unusual and interesting landscapes. Active volcanic and hydrothermal landscapes and their remarkable manifestations of geysers, fumaroles and boiling mud ponds are some of the surface features that fascinate visitors of National Parks, Geoparks and World Heritage areas worldwide. The uniqueness of hydrothermal activity bas…	[Erfurt-Cooper, Patricia] GEOTOURISM Australia, Canberra, ACT, Australia		Erfurt-Cooper, P (corresponding author), GEOTOURISM Australia, Canberra, ACT, Australia.	Patricia.Erfurt@my.jcu.edu.au							51	4	4	0	5	SPRINGER-VERLAG BERLIN	BERLIN	HEIDELBERGER PLATZ 3, D-14197 BERLIN, GERMANY	2364-3277	2364-3285	978-3-319-44097-2; 978-3-319-44095-8	ADV VOLCANOL			2018
J	De Giorgi, AU				De Giorgi, Andrea U.			Sustainable Practices? A Story from Roman Cosa (Central Italy)	JOURNAL OF MEDITERRANEAN ARCHAEOLOGY			English	Article						Cosa; Rome; southern Etruria; sustainability water; water-lifting devices	ARCHAEOLOGY	The thermal complex at the site of Cosa in Tuscany offers a clear example of how a Roman community, though crippled by the lack of springs or aqueducts, was nevertheless able to secure and husband sufficient water to operate a public bath, thanks to ingenious architectural adaptations and a unique strategy of water conservation. Regulated by the annual oscillation from wet to dry season and plaus…	[De Giorgi, Andrea U.] Florida State Univ, Class Dept, 324 Dodd Hall, Tallahassee, FL 32306 USA	State University System of Florida; Florida State University	De Giorgi, AU (corresponding author), Florida State Univ, Class Dept, 324 Dodd Hall, Tallahassee, FL 32306 USA.	adegiorgi@fsu.edu			Berliner Antike Kolleg; Loeb Foundation	Berliner Antike Kolleg; Loeb Foundation	I am indebted to many people and institutions: my co-director of the Cosa Excavations, R.T. Scott, the Cosa Excavations team, and in particular Matthew Brennan of Digital Cosa who provided me with images for this study. The editors of JMA, three anonymous reviewers, Jordan Pickett, Jill Weber, and Ann Glennie took the time to read an early version of this essay, providing me with most useful comm…		60	6	6	1	6	EQUINOX PUBLISHING LTD	SHEFFIELD	415, THE WORKSTATION, 15 PATERNOSTER ROW, SHEFFIELD, S1 2BX, ENGLAND	0952-7648			J MEDITERR ARCHAEOL	J. Mediterr. Archaeol.		2018	31	1
J	Avery, DC; Smith, CD				Avery, Dylan C.; Smith, Charlotte D.			Access to public drinking water fountains in Berkeley, California: a geospatial analysis	BMC PUBLIC HEALTH			English	Article						GIS; Spatial analysis; Demographics; Water; Fountains; Beverage tax	HEALTH; ACCESSIBILITY; DEPRIVATION; PEOPLE; AREA	Background: In January 2015, Berkeley, California became the first city in the Unites States to impose a tax on sugar-sweetened beverages. The tax is intended to discourage purchase of sugary beverages and promote consumption of healthier alternatives such as tap water. The goal of the study was to assess the condition of public drinking water fountains and determine if there is a difference in a…	[Avery, Dylan C.; Smith, Charlotte D.] Univ Calif Berkeley, Sch Publ Hlth, 50 Univ Hall 7360, Berkeley, CA 94702 USA	University of California System; University of California Berkeley	Smith, CD (corresponding author), Univ Calif Berkeley, Sch Publ Hlth, 50 Univ Hall 7360, Berkeley, CA 94702 USA.	charlottesmith@berkeley.edu							16	3	5	0	23	BIOMED CENTRAL LTD	LONDON	236 GRAYS INN RD, FLOOR 6, LONDON WC1X 8HL, ENGLAND	1471-2458			BMC PUBLIC HEALTH	BMC Public Health	JAN 24	2018	18
J	Barbato, M; Cirillo, L; Menditto, L; Moretti, R; Nardini, S				Barbato, M.; Cirillo, L.; Menditto, L.; Moretti, R.; Nardini, S.			Feasibility study of a geothermal energy system for indoor swimming pool in Campi Flegrei area	THERMAL SCIENCE AND ENGINEERING PROGRESS			English	Article						Geothermal energy; Low and medium temperature; Energy analysis; Indoor swimming pool		Technologies based on a renewable energy source can be an optimal solution to the heating of a swimming pool, which can be very expensive in terms of energy demand. In this work, the energy demand of a swimming pool located in Campi Flegrei area (Naples surroundings, Italy) is supplied by a geothermal plant. Campi Flegrei are a very advantageous location for a geothermal plant installation at eit…	[Barbato, M.; Cirillo, L.; Menditto, L.; Moretti, R.; Nardini, S.] Univ Campania Luigi Vanvitelli, Dipartimento Ingn Ind Informaz, Via Roma 29, I-81031 Aversa, CE, Italy; [Nardini, S.] Sun Energy Europe Srl, Acad Spin Off, Via B De Capua 26, I-81043 Capua, CE, Italy	Universita della Campania Vanvitelli	Nardini, S (corresponding author), Univ Campania Luigi Vanvitelli, Dipartimento Ingn Ind Informaz, Via Roma 29, I-81031 Aversa, CE, Italy.	sergio.nardini@unicampania.it	Nardini, Sergio/D-3128-2013	Nardini, Sergio/0000-0003-3000-8444; Cirillo, Luca/0000-0002-8705-8912					31	15	15	0	0	ELSEVIER	AMSTERDAM	RADARWEG 29, 1043 NX AMSTERDAM, NETHERLANDS	2451-9049			THERM SCI ENG PROG	Therm. Sci. Eng. Prog.	JUN	2018	6
J	Tassi, E; Grifoni, M; Bardelli, F; Aquilanti, G; La Felice, S; Iadecola, A; Lattanzi, P; Petruzzelli, G				Tassi, Eliana; Grifoni, Martina; Bardelli, Fabrizio; Aquilanti, Giuliana; La Felice, Sonia; Iadecola, Antonella; Lattanzi, Pierfranco; Petruzzelli, Gianniantonio			Evidence for the natural origins of anomalously high chromium levels in soils of the Cecina Valley (Italy)	ENVIRONMENTAL SCIENCE-PROCESSES & IMPACTS			English	Article							SERPENTINE SOILS; HEXAVALENT CHROMIUM; ULTRAMAFIC SOILS; CENTRAL GREECE; TRACE-ELEMENT; HEAVY-METALS; GROUNDWATER; CONTAMINATION; SPECTROSCOPY; CALIFORNIA	The problem of high levels of chromium is one of the most important issues in soils of the Mediterranean area, in particular those deriving from ophiolitic parent materials. Very often the chromium concentration is greater than the threshold values of legislation on soil pollution and the knowledge of the origin of contamination (natural or anthropogenic) is important to formulate risk characteri…	[Tassi, Eliana; Grifoni, Martina; Petruzzelli, Gianniantonio] CNR, ISE, Inst Ecosyst Studies, Via G Moruzzi 1, I-56124 Pisa, Italy; [Bardelli, Fabrizio] Univ Roma La Sapienza, CNR, Dept Phys, Nanotec, Ple Aldo Moro 2, I-00185 Rome, Italy; [Aquilanti, Giuliana] Elettra Sincrotrone Trieste, SS-14 Km 163-5, I-34149 Basovizza, TS, Italy; [La Felice, Sonia] CNR, IGG, Inst Geosci & Earth Resources, Via…	Consiglio Nazionale delle Ricerche (CNR); Istituto per lo Studio degli Ecosistemi (ISE-CNR); Sapienza University Rome; Consiglio Nazionale delle Ricerche (CNR); Istituto di Nanotecnologia (NANOTEC-CNR); Elettra Sincrotrone Trieste; Consiglio Nazionale delle Ricerche (CNR); Istituto di Geoscienze e Georisorse (IGG-CNR); Consiglio Nazionale delle Ricerche (CNR); Istituto di Geoscienze e Georisorse …	Tassi, E (corresponding author), CNR, ISE, Inst Ecosyst Studies, Via G Moruzzi 1, I-56124 Pisa, Italy.	eliana.tassi@ise.cnr.it	Tassi, Eliana L/I-3494-2012; Grifoni, Martina/ABF-1076-2020; La Felice, Sonia/Z-2670-2019; Lattanzi, Pierfranco/A-5817-2012	Tassi, Eliana L/0000-0002-3288-781X; Grifoni, Martina/0000-0002-9819-8814; La Felice, Sonia/0000-0002-5179-0589; Lattanzi, Pierfranco/0000-0003-4352-2709; Bardelli, Fabrizio/0000-0001-9224-8748; Iadecola, Antonella/0000-0002-9031-8455; petruzzelli, gianniantonio/0000-0002-1023-6901					42	11	12	1	20	ROYAL SOC CHEMISTRY	CAMBRIDGE	THOMAS GRAHAM HOUSE, SCIENCE PARK, MILTON RD, CAMBRIDGE CB4 0WF, CAMBS, ENGLAND	2050-7887	2050-7895		ENVIRON SCI-PROC IMP	Environ. Sci.-Process Impacts	JUN 1	2018	20	6
J	Annibaldi, A; Illuminati, S; Truzzi, C; Scarponi, G				Annibaldi, Anna; Illuminati, Silvia; Truzzi, Cristina; Scarponi, Giuseppe			Heavy Metals in Spring and Bottled Drinking Waters of Sibylline Mountains National Park (Central Italy)	JOURNAL OF FOOD PROTECTION			English	Article						Cadmium; Copper; Lead; Mineral water; Spring water; Tap water	ANODIC-STRIPPING VOLTAMMETRY; TRACE-ELEMENTS; ANTARCTIC AEROSOL; TAP WATER; LEAD; CONTAMINATION; CADMIUM; RELEASE; COPPER; PB	Heavy metal concentrations (cadmium, lead, and copper) in spring, tap, and bottled waters of the Sibylline Mountains National Park (central Italy) were investigated using square wave anodic stripping voltammetry from 2004 to 2011. The mean (+/- SD) concentrations detected (1.3 +/- 0.4 ng L-1 cadmium, 14 +/- 6 ng L-1 lead, and 0.16 +/- 0.10 mu g L-1 copper) were below the limits stipulated by Ital…	[Annibaldi, Anna; Illuminati, Silvia; Truzzi, Cristina; Scarponi, Giuseppe] Univ Politecn Marche, Dept Life & Environm Sci, Via Brecce Bianche, I-60131 Ancona, Italy	Marche Polytechnic University	Annibaldi, A (corresponding author), Univ Politecn Marche, Dept Life & Environm Sci, Via Brecce Bianche, I-60131 Ancona, Italy.	a.annibaldi@univpm.it	Illuminati, Silvia/T-7873-2019; Illuminati, Silvia/GXZ-5038-2022; Scarponi, Giuseppe/AAQ-6394-2021	Illuminati, Silvia/0000-0001-6465-5477; Scarponi, Giuseppe/0000-0003-2932-0596	Universita Politecnica delle Marche	Universita Politecnica delle Marche	Financial support was obtained from the Universita Politecnica delle Marche under university funding for scientific research Ricerca Scientifica di Ateneo and is gratefully acknowledged. Many thanks are due to Dr. Trognoni (Acqua Roana), Dr. Mariani (Acqua Nerea), and Carlo Ercoli for providing water samples from their factories and houses and for technical support on-site.		49	3	4	0	19	INT ASSOC FOOD PROTECTION	DES MOINES	6200 AURORA AVE SUITE 200W, DES MOINES, IA 50322-2863 USA	0362-028X	1944-9097		J FOOD PROTECT	J. Food Prot.	FEB	2018	81	2
J	Walsh, K; Brown, AG; Gourley, B; Scaife, R				Walsh, K.; Brown, A. G.; Gourley, B.; Scaife, R.			Archaeology, hydrogeology and geomythology in the Stymphalos valley	JOURNAL OF ARCHAEOLOGICAL SCIENCE-REPORTS			English	Article						Mediterranean palaeoenvironment; Greece; Geoarchaeology; Hydrogeology; Mythology; Greek & Roman archaeology	SW TURKEY; GREECE; HOLOCENE; LAKE; VEGETATION; LANDSCAPE; CLIMATE; POLLEN; PELOPONNESE; SEDIMENTS	This paper uses the results of recent excavations of the city of Stymphalos and environmental studies on the floor of the Stymphalos polje to examine the role of both the lake and springs in the history of the classical city. Associated with Artemis and famed for Herakles' sixth labour ( killing of the Stymphalian birds), the city has a rich ( geo) mythology. While this narrative has been associa…	[Walsh, K.; Gourley, B.] Kings Manor Univ York, Dept Archaeol, York, N Yorkshire, England; [Walsh, K.; Gourley, B.] Aix Marseille Univ, IMeRA Inst Adv Study, Marseille, France; [Brown, A. G.; Scaife, R.] Univ Southampton, PLUS, Shackleton Bldg, Southampton SO17 1BJ, Hants, England	Aix-Marseille Universite; University of Southampton	Walsh, K (corresponding author), Kings Manor Univ York, Dept Archaeol, York, N Yorkshire, England.;Walsh, K (corresponding author), Aix Marseille Univ, IMeRA Inst Adv Study, Marseille, France.	kevin.walsh@york.ac.uk	Brown, Antony/G-4498-2014	Brown, Antony/0000-0002-1990-4654	British Academy [SG-50253]; University of York; University of Southampton	British Academy; University of York; University of Southampton	The authorsmust thank Lyn Ertl, MarkDover and Bob Smith for their cartographic assistance and Mike Charno for assistance in the field. The work was funded by the British Academy (SG-50253) and contributions from the Universities of York and Southampton. We would also like to thank the two referees for their pertinent and useful observations. This work was carried with the relevant permits from th…		74	8	8	0	10	ELSEVIER	AMSTERDAM	RADARWEG 29, 1043 NX AMSTERDAM, NETHERLANDS	2352-409X			J ARCHAEOL SCI-REP	J. Archaeol. Sci.-Rep.	OCT	2017	15
J	Stewart, IS; Piccardi, L				Stewart, Iain S.; Piccardi, Luigi			Seismic faults and sacred sanctuaries in Aegean antiquity	PROCEEDINGS OF THE GEOLOGISTS ASSOCIATION			English	Article						Earthquakes; Archaeology; Tectonics; Greece; Turkey	PERACHORA PENINSULA; ACTIVE TECTONICS; DELPHIC ORACLE; EARTHQUAKE ARCHAEOLOGY; DENIZLI BASIN; CORINTH RIFT; GREECE; GULF; HIERAPOLIS; NOTCHES	The ancient destructive capability of earthquake faults is well chronicled by historians and their cultural impact widely uncovered by archaeologists. Archaeological and geological investigations at some of the most renowned sites in the ancient Greece world, however, suggest a more nuanced and intimate relationship between seismic faults and past human settlements. In the Aegean's karstic landsc…	[Stewart, Iain S.] Univ Plymouth, Sch Geog Earth & Environm Sci, Plymouth PL4 8AA, Devon, England; [Piccardi, Luigi] Inst Geosci & Earth Resources, CNR, Via G La Pira 4, I-50121 Florence, Italy	University of Plymouth; Consiglio Nazionale delle Ricerche (CNR); Istituto di Geoscienze e Georisorse (IGG-CNR)	Stewart, IS (corresponding author), Univ Plymouth, Sch Geog Earth & Environm Sci, Plymouth PL4 8AA, Devon, England.;Piccardi, L (corresponding author), Inst Geosci & Earth Resources, CNR, Via G La Pira 4, I-50121 Florence, Italy.	istewart@plymouth.ac.uk; luigi.piccardi@cnr.it	Piccardi, Luigi/AAJ-9820-2020; Stewart, Iain/HTM-3943-2023	Piccardi, Luigi/0000-0001-6964-3205; Stewart, Iain/0000-0002-9746-8667					114	14	15	0	10	ELSEVIER SCI LTD	OXFORD	THE BOULEVARD, LANGFORD LANE, KIDLINGTON, OXFORD OX5 1GB, OXON, ENGLAND	0016-7878			P GEOLOGIST ASSOC	Proc. Geol. Assoc.	OCT	2017	128	5-6
J	Fioravanti, A; Karagülle, M; Bender, T; Karagülle, MZ				Fioravanti, Antonella; Karagulle, Mine; Bender, Tamas; Karagulle, Mufit Zeki			Balneotherapy in osteoarthritis: Facts, fiction and gaps in knowledge	EUROPEAN JOURNAL OF INTEGRATIVE MEDICINE			English	Article						Balneotherapy; Cost-effectiveness; Knowledge; Mechanisms of action; Osteoarthritis; Randomized controlled trials	MUD-PACK THERAPY; BILATERAL KNEE OSTEOARTHRITIS; SULFUROUS THERMAL WATER; BATH THERAPY; FOLLOW-UP; MARKERS	Balneotherapy (BT) is widely used in daily clinical practice for the management of osteoarthritis (OA) in many European countries, as well as in Turkey, Israel and Japan (OA). However, despite its long history and tradition, the scientific value of BT is still the subject of discussion. The aim of this overview was to discuss the current evidence and critical points about the mechanisms of action…	[Fioravanti, Antonella] Azienda Osped Univ Senese, Le Scotte Policlin, Rheumatol Unit, Viale Bracci 1, I-53100 Siena, Italy; [Karagulle, Mine; Karagulle, Mufit Zeki] Istanbul Univ, Istanbul Fac Med, Dept Med Ecol & Hydroclimatol, Istanbul, Turkey; [Bender, Tamas] Polyclin Hosp Bros St John God, Budapest, Hungary	University of Siena; University Hospital of Siena; Istanbul University	Fioravanti, A (corresponding author), Azienda Osped Univ Senese, Le Scotte Policlin, Rheumatol Unit, Viale Bracci 1, I-53100 Siena, Italy.	fioravanti7@virgilio.it	Karagülle, Müfit Zeki/AAD-6090-2020; Karagülle, Mine/J-4418-2016	Karagülle, Mine/0000-0002-8060-970X					22	66	66	0	25	ELSEVIER SCIENCE INC	NEW YORK	360 PARK AVE SOUTH, NEW YORK, NY 10010-1710 USA	1876-3820	1876-3839		EUR J INTEGR MED	Eur. J. Integr. Med.	JAN	2017	9
J	Winde, F; Kaiser, F; Erasmus, E				Winde, Frank; Kaiser, Friederike; Erasmus, Ewald			Exploring the use of deep level gold mines in South Africa for underground pumped hydroelectric energy storage schemes	RENEWABLE & SUSTAINABLE ENERGY REVIEWS			English	Review						Underground pumped hydroelectric energy; storage; Deep level gold mine; Aquifer; Karst	FAR-WEST RAND; POST-CLOSURE DEVELOPMENT; DOLOMITIC SPRINGS; HYDRO STORAGE; MINING AREAS; POWER-PLANTS; WIND POWER; OPPORTUNITIES; FUTURE; THREATS	This paper explores the viability of deep level gold mines in the Far West Rand (FWR) gold field, South Africa (SA), for underground pumped hydroelectric energy storage (UPHES). Ultra-deep, non-flooded shafts, extensive underground storage space, and abundance of water from an overlying karst aquifer make gold mines in the FWR exceptionally suitable for UPHES. With generating capacities ranging f…	[Winde, Frank; Erasmus, Ewald] NWU VTC, Mine Water Re Search Grp, POB 1174, ZA-1900 Vanderbijlpark, South Africa; [Kaiser, Friederike] Energy Res Ctr Lower Saxony, Stollen 19A, D-38640 Goslar, Germany		Kaiser, F (corresponding author), Energy Res Ctr Lower Saxony, Stollen 19A, D-38640 Goslar, Germany.	f.kaiser@efzn.de	Winde, Frank/B-7837-2010						85	37	44	7	56	PERGAMON-ELSEVIER SCIENCE LTD	OXFORD	THE BOULEVARD, LANGFORD LANE, KIDLINGTON, OXFORD OX5 1GB, ENGLAND	1364-0321			RENEW SUST ENERG REV	Renew. Sust. Energ. Rev.	OCT	2017	78
J	Christaki, M; Stournaras, G; Nastos, P; Mamasis, N				Christaki, M.; Stournaras, G.; Nastos, P.; Mamasis, N.			THE MAJESTIC HADRIANIC AQUEDUCT OF THE CITY OF ATHENS	GLOBAL NEST JOURNAL			English	Article						Hadrianic; aqueducts; tunnel; wells; groundwater; water resources	ANCIENT-GREECE; WATER	Athens in antiquity as well today, included all the settlements in the wider Attica region. That is why its official name was the Athens (plural). Since prehistoric times, the city of Athens and the wider region of Attica did not contain many natural water sources so aquatic reserves were never adequate to meet the needs of residents, as these changed through time. The construction of aqueducts w…	[Christaki, M.; Stournaras, G.] Univ Athens, Fac Geol & Geoenvironm, Dept Dynam Tecton Appl Geol, Panepistimiopolis 15784, Greece; [Nastos, P.] Univ Athens, Fac Geol & Geoenvironm, Dept Geog & Climatol, Panepistimiopolis 15784, Greece; [Mamasis, N.] Natl Tech Univ Athens, Sch Civil Engn, Dept Water Resources & Environm Engn, Iroon Polytech 5, Zografos 15780, Greece	National & Kapodistrian University of Athens; National & Kapodistrian University of Athens; National Technical University of Athens	Christaki, M (corresponding author), Univ Athens, Fac Geol & Geoenvironm, Dept Dynam Tecton Appl Geol, Panepistimiopolis 15784, Greece.	ritachristaki@yahoo.gr	Nastos, Panagiotis/Q-5419-2019; Nastos, Panagiotis T/E-7455-2015	Nastos, Panagiotis/0000-0001-9336-6586; Nastos, Panagiotis T/0000-0001-9336-6586					19	1	1	0	2	GLOBAL NETWORK ENVIRONMENTAL SCIENCE & TECHNOLOGY	ATHENS	30 VOULGAROKTONOU STR, ATHENS, GR 114 72, GREECE	1790-7632			GLOBAL NEST J	Glob. Nest. J.	SEP	2016	18	3
J	Angelakis, AN; Voudouris, KS; Mariolakos, I				Angelakis, Andreas N.; Voudouris, Konstantinos S.; Mariolakos, Ilias			Groundwater utilization through the centuries focusing οn the Hellenic civilizations	HYDROGEOLOGY JOURNAL			English	Article						Greece; Groundwater exploration; History of hydrogeology; Water supply; Wells	URBAN WATER; MINOAN; TECHNOLOGIES; AQUEDUCTS; GREECE; QANATS; CRETE	Groundwater has been utilized since the Prehistoric times. Water supply of some Minoan settlements on the eastern side of the island of Crete (Greece) was based on groundwater. Later on, many wells were constructed in several areas of Greece and their use expanded through subsequent periods. The greatest achievement in groundwater exploitation by ancient Greeks was the construction of long underg…	[Angelakis, Andreas N.] Natl Fdn Agr Res NAGREF, Inst Herakl, Iraklion 71307, Greece; [Voudouris, Konstantinos S.] Aristotle Univ Thessaloniki, Dept Geol, Lab Engn Geology& Hydrogeol, Thessaloniki 54124, Greece; [Mariolakos, Ilias] Univ Athens, Dept Geol, Athens, Greece	Aristotle University of Thessaloniki; National & Kapodistrian University of Athens	Voudouris, KS (corresponding author), Aristotle Univ Thessaloniki, Dept Geol, Lab Engn Geology& Hydrogeol, Thessaloniki 54124, Greece.	info@a-angelakis.gr; kvoudour@geo.auth.gr		Voudouris, Konstantinos/0000-0002-5409-1740					58	12	12	2	19	SPRINGER	NEW YORK	233 SPRING ST, NEW YORK, NY 10013 USA	1431-2174	1435-0157		HYDROGEOL J	Hydrogeol. J.	AUG	2016	24	5
J	Powell, O; Fensham, R				Powell, Owen; Fensham, Rod			The history and fate of the Nubian Sandstone Aquifer springs in the oasis depressions of the Western Desert, Egypt	HYDROGEOLOGY JOURNAL			English	Article						Egypt; Groundwater development; Arid regions; History of hydrogeology; Oasis	KHARGA OASIS; STABLE-ISOTOPE; NORTH-AFRICA; OCCUPATION; WETLANDS; SAHARA; QANATS; TUFAS; SUDAN; OASES	Extraction of groundwater for agriculture has resulted in the loss of springs across arid regions of the globe. The history and fate are recorded of the artesian springs of Egypt's Western Desert, from ancient times to the present, spanning the rise and fall of the great civilisations from the Pharoanic dynasties to Persian, Greek and Roman conquests. The study area includes oases Kharga, Dakhla,…	[Powell, Owen] Univ Tasmania, Sch Humanities, Hobart, Tas 7001, Australia; [Fensham, Rod] Univ Queensland, Sch Biol Sci, Queensland Herbarium, Mt Coot Tha Rd, Toowong, Qld 4066, Australia	University of Tasmania; University of Queensland	Powell, O (corresponding author), Univ Tasmania, Sch Humanities, Hobart, Tas 7001, Australia.	owen.powell@uq.edu.au		Fensham, Roderick/0000-0003-3658-5867	Council of Australian Arab Relations	Council of Australian Arab Relations	The authors would like to acknowledge the Council of Australian Arab Relations for their financial support of this project. The authors wish to thank Professor Magdy Torab and Egyptian Environmental Changes Society for their help establishing the project as well as Jennifer Silcock and Anna Flittner for assisting with field work. The authors would also like to acknowledge the Egyptian Geography S…		49	29	29	0	20	SPRINGER	NEW YORK	233 SPRING ST, NEW YORK, NY 10013 USA	1431-2174	1435-0157		HYDROGEOL J	Hydrogeol. J.	MAR	2016	24	2
J	Martarelli, L; Iacuitto, M; Gregori, V; Menotti, RM; Petitta, M; Scalise, AR				Martarelli, Lucio; Iacuitto, Marcello; Gregori, Vincenzo; Menotti, Riccardo Massimiliano; Petitta, Marco; Scalise, Anna Rosa			The Rieti Land Reclamation Authority relevance in the management of surface waters for the irrigation purposes of the Rieti Plain (Central Italy)	ACQUE SOTTERRANEE-ITALIAN JOURNAL OF GROUNDWATER			English	Article						Rieti Land Reclamation Authority; surface water management; irrigation; hydrogeology; Rieti Plain		The Rieti Plain is crowned by calcareous-marly reliefs (Rieti and Sabini Mountains) and represents an intra-Apennine Plio-Quaternary alluvial and fluvial-lacustrine basin formed after multi-stage extensional tectonic processes. This territory presents huge amounts of water resources (Velino and Turano rivers; several springs; Lungo and Ripasottile lakes, relics of ancient Lacus Velinus). The aqui…	[Martarelli, Lucio; Scalise, Anna Rosa] Geol Survey Italy, Italian Natl Inst Environm Protect & Res, Via Vitaliano Brancati 48, I-00144 Rome, Italy; [Iacuitto, Marcello; Gregori, Vincenzo] Rieti Land Reclamat Author, Via Orchidee 20, I-02100 Rieti, Italy; [Menotti, Riccardo Massimiliano] IFAC CNR, Via Madonna del Piano 10, I-50019 Florence, Italy; [Petitta, Marco] Sapienza Univ Rome, Earth Sci De…	Italian Institute for Environmental Protection & Research (ISPRA); Consiglio Nazionale delle Ricerche (CNR); Istituto di Fisica Applicata Nello Carrara (IFAC-CNR); Sapienza University Rome	Martarelli, L (corresponding author), Geol Survey Italy, Italian Natl Inst Environm Protect & Res, Via Vitaliano Brancati 48, I-00144 Rome, Italy.	lucio.martarelli@isprambiente.it	Petitta, Marco/D-3848-2009	Petitta, Marco/0000-0003-1137-6137					15	0	0	0	3	PAGEPRESS PUBL	PAVIA	MEDITGROUP, VIA G BELLI, 4, PAVIA, 27100, ITALY	1828-454X			ACQUE SOTTER	Acque Sotter.		2016	5	2	2
C	Sappa, G; Ferranti, F; De Filippi, FM			SGEM	Sappa, Giuseppe; Ferranti, Flavia; De Filippi, Francesco Maria			HYDROGEOLOGICAL WATER BUDGET OF THE KARST AQUIFER FEEDING PERTUSO SPRING (CENTRAL ITALY)	16TH INTERNATIONAL MULTIDISCIPLINARY SCIENTIFIC GEOCONFERENCE, SGEM 2016: SCIENCE AND TECHNOLOGIES IN GEOLOGY, EXPLORATION AND MINING, VOL I	International Multidisciplinary Scientific GeoConference-SGEM		English	Proceedings Paper	16th International Multidisciplinary Scientific Geoconference (SGEM 2016)	JUN 30-JUL 06, 2016	Albena, BULGARIA	Bulgarian Acad Sci,Acad Sci Czech Republ,Latvian Acad Sci,Polish Acad Sci,Russian Acad Sci,Serbian Acad Sci & Arts,Slovak Acad Sci,Natl Acad Sci Ukraine,Inst Water Problem & Hydropower NAS KR,Natl Acad Sci Armenia,Sci Council Japan,World Acad Sci,European Acad Sci Arts & Lett,Acad Sci Moldova,Montenegrin Acad Sci & Arts,Croatian Acad Sci & Arts,Georgian Natl Acad Sci,Acad Fine Arts & Design Brati…		carbonatic karst aquifer; Pertuso Spring; inverse water balance; water budget; GIS	RECHARGE	The evaluation of the active recharge of karst aquifers is an important tool to estimate the groundwater resource availability in these complex hydrogeological systems, characterized by spatial and temporal variability of many hydrogeological factors, involved in groundwater flow. As a matter of fact, the rate of recharge is a key aspect for sustainable exploitation and management of these ground…	[Sappa, Giuseppe; Ferranti, Flavia; De Filippi, Francesco Maria] Sapienza Univ Rome, Dept Civil & Environm Engn, DICEA, Rome, Italy	Sapienza University Rome	Sappa, G (corresponding author), Sapienza Univ Rome, Dept Civil & Environm Engn, DICEA, Rome, Italy.			De Filippi, Francesco Maria/0000-0002-7204-880X					14	1	1	0	0	STEF92 TECHNOLOGY LTD	SOFIA	1 ANDREY LYAPCHEV BLVD, SOFIA, 1797, BULGARIA	1314-2704		978-619-7105-55-1	INT MULTI SCI GEOCO			2016
J	Gutrich, JJ; Gigliello, K; Gardner, KV; Elmore, AJ				Gutrich, John J.; Gigliello, Keith; Gardner, Kimberly Vest; Elmore, Andrew J.			Economic returns of groundwater management sustaining an ecosystem service of dust suppression by alkali meadow in Owens Valley, California	ECOLOGICAL ECONOMICS			English	Article						Groundwater management; Temporal loss of ecosystem service; Particulate matter; Alkali meadow; Restoration costs; Air quality	EXTRACTION; VALUATION; CLIMATE; LAKE	This paper addresses the economic tradeoff between pumping groundwater and maintaining a native plant community that provides an ecosystem service of dust suppression. A dynamic ecological economic simulation model was created to assess net benefits of production (i.e., economic rent) from groundwater management while requiring a producer to maintain or restore native groundwater dependent vegeta…	[Gutrich, John J.; Gigliello, Keith] Southern Oregon Univ, Environm Sci & Policy Program, 1250 Siskiyou Blvd,Taylor Hall 113, Ashland, OR 97520 USA; [Gardner, Kimberly Vest; Elmore, Andrew J.] Univ Maryland, Ctr Environm Sci, Appalachian Lab, Frostburg, MD USA	University System of Maryland; University of Maryland Center for Environmental Science	Gutrich, JJ (corresponding author), Southern Oregon Univ, Environm Sci & Policy Program, 1250 Siskiyou Blvd,Taylor Hall 113, Ashland, OR 97520 USA.	gutrichj@sou.edu	Elmore, Andrew James/D-4341-2012	Elmore, Andrew James/0000-0002-9697-9457; Gigliello, Keith/0000-0002-9237-5859	National Science Foundation [EAR0719793]	National Science Foundation(National Science Foundation (NSF))	The authors wish to acknowledge the efforts of Lance Woods and Jacob King of Southern Oregon University for their help with model formulation and field data collection. The authors wish to thank three anonymous reviewers for their helpful comments and feedback on the manuscript. We also acknowledge the financial support of the National Science Foundation for funding this project through a Researc…		45	4	4	4	27	ELSEVIER SCIENCE BV	AMSTERDAM	PO BOX 211, 1000 AE AMSTERDAM, NETHERLANDS	0921-8009	1873-6106		ECOL ECON	Ecol. Econ.	JAN	2016	121
J	Amanzio, G; Marchionatti, F; Lavy, M; Ghione, R; De Maio, M				Amanzio, Gianpiero; Marchionatti, Federico; Lavy, Muriel; Ghione, Raffaella; De Maio, Marina			Springs monitoring data analysis with a frequency and time domain approach: the case study of Mascognaz spring (Aosta Valley)	GEAM-GEOINGEGNERIA AMBIENTALE E MINERARIA-GEAM-GEOENGINEERING ENVIRONMENT AND MINING			Italian	Article						mountain spring; time series analysis; porous media; Aosta Valley; spring monitoring	SPECTRAL-ANALYSES; HYDROGRAPHS	Aquifers in mountain areas are a strategic resource for people who live there. In fact, their proper management is strongly influenced by periods of high water stress, linked to tourism activity. In order to optimize future water management, it is fundamental to understand hydrogeological characteristics of these systems. Due to the lack of economic resources, these hydrogeological systems are in…	[Amanzio, Gianpiero; Marchionatti, Federico; Lavy, Muriel; Ghione, Raffaella; De Maio, Marina] Politecn Torino, DIATI, Turin, Italy	Polytechnic University of Turin	Amanzio, G (corresponding author), Politecn Torino, DIATI, Turin, Italy.								26	1	1	0	0	PATRON EDITORE S R L	BOLOGNA	VIA BADINI 12, QUARTO INFERIORE, BOLOGNA, 00000, ITALY	1121-9041			GEAM-GEOING AMBIENT	Geam-Geoint. Ambient. Min.	APR	2016		147
J	Casale, A; Saroli, M; Giovinco, G; Lancia, M; Albano, M; Zarlenga, F; Dell'Isola, M				Casale, Anna; Saroli, Michele; Giovinco, Gaspare; Lancia, Michele; Albano, Matteo; Zarlenga, Francesco; Dell'Isola, Marco			Hydrogeological study and numerical model of the Suio-Castelforte hydrothermal area (central Italy)	RENDICONTI ONLINE SOCIETA GEOLOGICA ITALIANA			English	Article						Aurunci Mts.; numerical analysis; Roccamonfina Volcano; thermal springs		A numerical simulation has been performed through the natural geothermal system of Suio-Castelforte (LT) in order to investigate the hydothermal area and assess its geothermal potentiality. Starting from geological and hydrogeological data a 2D conceptual model has been built. For numerical purpose, the latter idealizes and simplifies the natural system. The area has been affected by a temperatur…	[Casale, Anna; Saroli, Michele; Giovinco, Gaspare; Lancia, Michele; Albano, Matteo; Dell'Isola, Marco] Univ Cassino & Southern Lazio, Dept Civil & Mech Engn, Via G Di Biasio 43, I-03043 Cassino, Italy; [Albano, Matteo] Ist Nazl Geofis & Vulcanol, Via Vigna Murata 605, I-00143 Rome, Italy; [Zarlenga, Francesco] ENEA Casaccia Res Ctr, Tech Unit Renewable Energy Sources, Via Anguillarese 301, I-0012…	University of Cassino; Istituto Nazionale Geofisica e Vulcanologia (INGV); Italian National Agency New Technical Energy & Sustainable Economics Development	Casale, A (corresponding author), Univ Cassino & Southern Lazio, Dept Civil & Mech Engn, Via G Di Biasio 43, I-03043 Cassino, Italy.	a.casale@unicas.it	Saroli, Michele MS/F-5132-2017; Lancia, Michele/AAM-3275-2020; Albano, Matteo/K-3825-2017	Saroli, Michele MS/0000-0001-9499-3960; Albano, Matteo/0000-0003-2772-2401; Dell'Isola, Marco/0000-0001-7976-5484; Lancia, Michele/0000-0002-4862-5179					14	1	1	1	7	SOC GEOLOGICA ITALIANA	ROME	UNIV DEGLI STUDI LA SAPIENZA, DIPART SCI DELLA TERRA, PIAZZALE ALDO MORO 5, ROME, I-00185, ITALY	2035-8008			REND ONLINE SOC GEOL	Rend. Online Soc. Geol. Ital.	NOV	2016	41
J	Cantonati, M; Segadelli, S; Ogata, K; Tran, H; Sanders, D; Gerecke, R; Rott, E; Filippini, M; Gargini, A; Celico, F				Cantonati, Marco; Segadelli, Stefano; Ogata, Kei; Tran, Ha; Sanders, Diethard; Gerecke, Reinhard; Rott, Eugen; Filippini, Maria; Gargini, Alessandro; Celico, Fulvio			A global review on ambient Limestone-Precipitating Springs (LPS): Hydrogeological setting, ecology, and conservation	SCIENCE OF THE TOTAL ENVIRONMENT			English	Review						Limestone-Precipitating Springs (LPS); Spring habitats; Biocalcification; EU Habitat Directive; Tufa Springs; Spring-Associated Limestones (SAL); Freshwater conservation; Travertines	GROUNDWATER-FLOW SYSTEMS; TRAVERTINE DEPOSITS; MICROBIAL CARBONATES; NORTHERN APENNINES; COLORADO PLATEAU; WATER CHEMISTRY; TUFA DEPOSITS; CALCITE; REGION; BASIN	Springs are biodiversity hotspots and unique habitats that are threatened, especially by water overdraft. Here we review knowledge on ambient-temperature (non-geothermal) freshwater springs that achieve sufficient oversaturation for CaCO3 - by physical CO2 degassing and activity of photoautotrophs- to deposit limestone, locally resulting in scenic carbonate structures: Limestone-Precipitating Spr…	[Cantonati, Marco] Museo Sci MUSE, Limnol & Phycol Sect, Corso Lavoro & Sci 3, I-38123 Trento, Italy; [Segadelli, Stefano] Emilia Romagna Reg, Geol Seism & Soil Survey, Bologna, Italy; [Tran, Ha; Sanders, Diethard] Univ Innsbruck, Fac Geo & Atmospher Sci, Inst Geol, Innrain 52f, A-6020 Innsbruck, Austria; [Segadelli, Stefano; Ogata, Kei; Celico, Fulvio] Univ Parma, Dept Phys & Earth Sci, Parma, I…	University of Innsbruck; University of Parma; Eberhard Karls University of Tubingen; University of Innsbruck; University of Bologna	Cantonati, M (corresponding author), Museo Sci MUSE, Limnol & Phycol Sect, Corso Lavoro & Sci 3, I-38123 Trento, Italy.	marco.cantonati@muse.it	Filippini, Maria/AAJ-5779-2021; Cantonati, Marco/G-4278-2018; Ogata, Kei/P-3125-2016; Rott, Eugen EGR/J-4768-2012; Filippini, Maria/AAW-1358-2020	Filippini, Maria/0000-0001-5050-5072; Cantonati, Marco/0000-0003-0179-3842; Ogata, Kei/0000-0002-4978-2854; Filippini, Maria/0000-0001-5050-5072; segadelli, stefano/0000-0001-5260-6256; Tran, Ha/0000-0003-3811-2457; Gargini, Alessandro/0000-0002-9271-219X	EBERs Project - Geological Survey of the Emilia-Romagna Region [PG.2011.0147111]; Project 911 of the OeAD Vietnam-Austria PhD Scholarship Programme	EBERs Project - Geological Survey of the Emilia-Romagna Region; Project 911 of the OeAD Vietnam-Austria PhD Scholarship Programme	This paper is part of the STOTEN virtual special issue, titled 'The relevance and potential of benthic algae for present-day freshwater ecological assessments'. This work was partially supported by the EBERs Project (Exploring the Biodiversity of Emilia-Romagna springs; Emilia-Romagna Region official record N. PG.2011.0147111, June 15th 2011) funded by the Geological Survey of the Emilia-Romagna …		145	51	54	7	88	ELSEVIER SCIENCE BV	AMSTERDAM	PO BOX 211, 1000 AE AMSTERDAM, NETHERLANDS	0048-9697	1879-1026		SCI TOTAL ENVIRON	Sci. Total Environ.	OCT 15	2016	568
J	Juuti, PS; Antoniou, GP; Dragoni, W; El-Gohary, F; De Feo, G; Katko, TS; Rajala, RP; Zheng, XY; Drusiani, R; Angelakis, AN				Juuti, Petri S.; Antoniou, Georgios P.; Dragoni, Walter; El-Gohary, Fatma; De Feo, Giovanni; Katko, Tapio S.; Rajala, Riikka P.; Zheng, Xiao Yun; Drusiani, Renato; Angelakis, Andreas N.			Short Global History of Fountains	WATER			English	Article						Chinese civilizations; Egyptians; Etruscans; Minoans; Hellenes; Medieval times; Ottomans; Romans; water distribution; water supply systems	URBAN WATER; SYSTEMS	Water fountains are part of every human settlement, and historical and mythological stories. They are the source from which life-sustaining water was distributed to people until piped systems started providing fresh tap water inside buildings. In many places, people visit fountains to experience the freshness of running water, to prepare for prayers, or to make a wish. Fountains have also provide…	[Juuti, Petri S.; Rajala, Riikka P.] Univ Tampere, Int Environm Hist Grp, FI-33014 Tampere, Finland; [Antoniou, Georgios P.] NTUA, Dept Architecture Engn, PhDc, Athens 10682, Greece; [Dragoni, Walter] Univ Perugia, Dept Phys & Geol, I-06123 Perugia, Italy; [El-Gohary, Fatma] Natl Res Ctr, Water Pollut Res Dept, Cairo 12622, Egypt; [De Feo, Giovanni] Univ Salerno, Dept Ind Engn, I-84084 Fisciano, …	Tampere University; National Technical University of Athens; University of Perugia; Egyptian Knowledge Bank (EKB); National Research Centre (NRC); University of Salerno; Tampere University; Tampere University	Juuti, PS (corresponding author), Univ Tampere, Int Environm Hist Grp, FI-33014 Tampere, Finland.	petri.juuti@uta.fi; antonioug@tee.gr; walter.dragoni@unipg.it; fgohary@hotmail.com; g.defeo@unisa.it; tapio.katko@tut.fi; riikka.rajala@uta.fi; zhengxy68@163.com; renato.drusiani@federutility.it; info@a-angelakis.gr	Dragoni, Walter/AAG-2564-2019; De Feo, Giovanni/J-7435-2012	Dragoni, Walter/0000-0001-6291-5765; De Feo, Giovanni/0000-0002-0696-0569; Juuti, Riikka Pauliina/0000-0002-9106-248X; Katko, Tapio/0000-0001-9554-2766; Juuti, Petri Sakari/0000-0002-1387-7237; el-Gohary, fatma/0000-0002-5056-925X	Academy of Finland AKVA project Water as Social and Cultural Space [263417]; Provincia di Perugia; Fondazione Cassa di Risparmio di Perugia [2010.011.0442]; Academy of Finland (AKA) [263417, 263417] Funding Source: Academy of Finland (AKA)	Academy of Finland AKVA project Water as Social and Cultural Space(Research Council of Finland); Provincia di Perugia; Fondazione Cassa di Risparmio di Perugia(Fondazione Cassa Risparmio Perugia); Academy of Finland (AKA)(Research Council of Finland)	We thank Academy of Finland AKVA project Water as Social and Cultural Space (No. 263417) for their support. The chapters on Etruria, Rome and the Middle Ages in Western Europe were supported by Provincia di Perugia and Fondazione Cassa di Risparmio di Perugia (project 2010.011.0442, coordinated by W. Dragoni).		57	7	7	0	11	MDPI	BASEL	ST ALBAN-ANLAGE 66, CH-4052 BASEL, SWITZERLAND	2073-4441			WATER-SUI	Water	MAY	2015	7	5
J	Crespo, MBB; Espín, JMG				Bernabe Crespo, Miguel Borja; Gomez Espin, Jose Maria			The Cartagena water supply	CUADERNOS GEOGRAFICOS			Spanish	Article						water supply; water infrastructure; water consumption; Cartagena; Southeast Spain		Water shortage in the region of the Southeast of the Iberian Peninsula, where Cartagena and its surroundings belong, has forced to search and bring foreign water resources in order to meet the supply needs of Cartagena. Initially, due to the absence of permanent rivers, it was necessary to build wells and cisterns; small aqueducts from fountains and springs of limited capacity, and subfluvial ext…	[Bernabe Crespo, Miguel Borja; Gomez Espin, Jose Maria] Univ Murcia, E-30001 Murcia, Spain	University of Murcia	Crespo, MBB (corresponding author), Univ Murcia, E-30001 Murcia, Spain.	miguelborjabc@gmail.com; espin@um.es	ESPIN, JOSE MARIA GOMEZ/AAA-4530-2019; BERNABE-CRESPO, MIGUEL BORJA/AAA-4538-2019						32	1	1	0	5	UNIV GRANADA	GRANADA	CUESTA DEL HOSPICIO S-N, GRANADA, 18071, SPAIN	0210-5462			CUAD GEOGR	Cuad. Geogr.		2015	54	2
J	Woelfle-Erskine, C				Woelfle-Erskine, Cleo			Rain Tanks, Springs, and Broken Pipes As Emerging Water Commons Along Salmon Creek, CA, USA	ACME-AN INTERNATIONAL E-JOURNAL FOR CRITICAL GEOGRAPHIES			English	Article							MANAGEMENT; REUSE; DECENTRALIZATION; GREYWATER; ISSUES	Large waterworks helped to produce California's cities, agricultural bounty, and attendant discourses of progress, private property, and human control over riverine ecosystems (Woelfle-Erskine, 2007). However, over the past two decades, water governance has been decentralized and some infrastructure diversified with rain tank retrofits, creating new local waterscapes in the interstices of Califor…	Univ Calif Berkeley, Energy & Resources Grp, Berkeley, CA 94720 USA	University of California System; University of California Berkeley	Woelfle-Erskine, C (corresponding author), Univ Calif Berkeley, Energy & Resources Grp, Berkeley, CA 94720 USA.	cleo.we@berkeley.edu	Woelfle-Erskine, Cleo/AAL-8964-2020		National Science Foundation Graduate Research Fellowship	National Science Foundation Graduate Research Fellowship(National Science Foundation (NSF))	I would like to acknowledge Salmon Creek residents, the Salmon Creek Watershed Council, and the Gold Ridge Resource Conservation district for research collaboration and logistical assistance during fieldwork. Conversations with Isha Ray and Jeff Romm shaped my research approach and honed my analysis of institutional arrangements and household water practices. Conversations with Dan Sarna and Kim …		39	7	7	0	3	UNIV BRITISH COLUMBIA-OKANAGAN	KELOWNA	3333 UNIVERSITY WAY, KELOWNA, BC V1V 1V7, CANADA	1492-9732			ACME	Acme		2015	14	3
J	Menichini, M; Da Prato, S; Doveri, M; Ellero, A; Lelli, M; Masetti, G; Nisi, B; Raco, B				Menichini, Matia; Da Prato, Simone; Doveri, Marco; Ellero, Alessandro; Lelli, Matteo; Masetti, Giulio; Nisi, Barbara; Raco, Brunella			An integrated methodology to define Protection Zones for groundwater-based drinking water sources: an example from the Tuscany Region, Italy	ACQUE SOTTERRANEE-ITALIAN JOURNAL OF GROUNDWATER			Italian	Article						protection zones; water for human consumption; groundwater management; conceptual hydrogeological model		Water is an essential economic and social resource. It is also finite and vulnerable. For Europe, this generally accepted understanding has been translated into the European and National Directive (2000/60/EC, D.Lgs. 152/2006). This law has led to an increased awareness of the role of the resource and its importance in the socioeconomic, cultural, and political realms. To protect this resource, s…	[Menichini, Matia; Da Prato, Simone; Doveri, Marco; Ellero, Alessandro; Lelli, Matteo; Masetti, Giulio; Nisi, Barbara; Raco, Brunella] CNR, IGG, Via Moruzzi 1, Pisa, Italy	Consiglio Nazionale delle Ricerche (CNR); Istituto di Geoscienze e Georisorse (IGG-CNR)	Menichini, M (corresponding author), CNR, IGG, Via Moruzzi 1, Pisa, Italy.	m.menichini@igg.cnr.it; simone.daprato@igg.cnr.it; doveri@igg.cnr.it; ellero@igg.cnr.it; m.lelli@igg.cnr.it; masetti@igg.cnr.it; b.nisi@igg.cnr.it; b.raco@igg.cnr.it	doveri, marco/A-1746-2018; Ellero, Alessandro/AAW-3162-2020; Raco, Brunella/AAX-8138-2020; Masetti, Giulio/AAX-7160-2020; Lelli, Matteo/AAX-2090-2020; Menichini, Matia/AAC-1765-2020; Nisi, Barbara/AAW-4894-2020	doveri, marco/0000-0002-7848-1225; Ellero, Alessandro/0000-0003-2826-6161; Masetti, Giulio/0000-0003-0355-3500; Raco, Brunella/0000-0002-0196-9855					23	5	5	0	3	PAGEPRESS PUBL	PAVIA	MEDITGROUP, VIA G BELLI, 4, PAVIA, 27100, ITALY	1828-454X			ACQUE SOTTER	Acque Sotter.		2015	4	1
J	Kallioras, A; Marinos, P				Kallioras, A.; Marinos, P.			Water resources assessment and management of karst aquifer systems in Greece	ENVIRONMENTAL EARTH SCIENCES			English	Article						Groundwater resources management; Karst aquifers; Water supply; Granular aquifers; Greece; Mediterranean	SEAWATER INTRUSION; EVROTAS RIVER; ARTIFICIAL RECHARGE; CONCEPTUAL-MODEL; GROUNDWATER; VULNERABILITY; QUALITY; BASIN; FRAMEWORK; SPRINGS	Groundwater resources of karst aquifers within Circum-Mediterranean are a vital natural resource, which have been exploited since the dawn of the Mediterranean civilization. In Greece, carbonate formations are thought to be one of the most important sources for various water uses, that are vital for the country's economy and development, that is agriculture and water supply. In most cases, they a…	[Kallioras, A.] Natl Tech Univ Athens, Sch Min & Met Engn, Athens, Greece; [Marinos, P.] Natl Tech Univ Athens, Sch Civil Engn, Athens, Greece	National Technical University of Athens; National Technical University of Athens	Marinos, P (corresponding author), Natl Tech Univ Athens, Sch Civil Engn, Athens, Greece.	marinos@central.ntua.gr	Kallioras, Andreas/AFA-2089-2022	Kallioras, Andreas/0000-0003-4661-297X					113	14	14	1	38	SPRINGER	NEW YORK	233 SPRING ST, NEW YORK, NY 10013 USA	1866-6280	1866-6299		ENVIRON EARTH SCI	Environ. Earth Sci.	JUL	2015	74	1
J	Günay, G; Güner, N; Törk, K				Gunay, G.; Guner, N.; Tork, K.			Turkish karst aquifers	ENVIRONMENTAL EARTH SCIENCES			English	Article						Karst; Spring; Cave; Sinkholes; Speleological investigation	TURKEY	One third of Turkey's surface is underlain by carbonate rocks that have been subdivided into four karst regions. The carbonate rock units are about 200 km wide along the Taurus Mountains that attain elevations of 2500 m. Karst features of western Turkey bordering the Aegean and Mediterranean seas demonstrate the tectonic, lithological and climatic controls on the occurrence, movement, and chemica…	[Gunay, G.] Hacettepe Univ, Ankara, Turkey; [Guner, N.] Dept Energy Raw Mat Res & Explorat, Hydrogeol Res Unit, Ankara, Turkey; [Tork, K.] Dept Geol Res, Karst & Cave Res Unit, Ankara, Turkey	Hacettepe University; Ministry of Energy & Natural Resources - Turkey	Günay, G (corresponding author), Hacettepe Univ, Ankara, Turkey.	ggunay@ttmail.com; noyan.guner@mta.gov.tr; koray.tork@mta.gov.tr							16	12	12	2	21	SPRINGER	NEW YORK	233 SPRING ST, NEW YORK, NY 10013 USA	1866-6280	1866-6299		ENVIRON EARTH SCI	Environ. Earth Sci.	JUL	2015	74	1
J	Manna, F; Nimmo, JR; Allocca, V; De Vita, P				Manna, Ferdinando; Nimmo, John R.; Allocca, Vincenzo; De Vita, Pantaleone			Recharge in karst aquifers: from regional to local and annual to episodic scale	RENDICONTI ONLINE SOCIETA GEOLOGICA ITALIANA			English	Article						Groundwater recharge; karst aquifer; Water Table Fluctuation	GROUNDWATER RECHARGE	The assessment of groundwater recharge for karst aquifers of southern Italy is a major scientific task due to the relevant socio-economic and environmental role of the related groundwater resources. In this paper, the results of two methods, applied at different spatial and time scales, are reported. At regional and mean annual scales, through a multidisciplinary approach, the mean Annual Groudwa…	[Manna, Ferdinando; Allocca, Vincenzo; De Vita, Pantaleone] Univ Naples Federico II, Dept Earth Sci Environm & Resources, Naples, Italy; [Nimmo, John R.] US Geol Survey, Menlo Pk, CA 94025 USA	University of Naples Federico II; United States Department of the Interior; United States Geological Survey	Manna, F (corresponding author), Univ Naples Federico II, Dept Earth Sci Environm & Resources, Naples, Italy.	ferdinando.manna@unina.it	De Vita, Pantaleone/ABI-3797-2020; Manna, Ferdinando/D-4749-2018	De Vita, Pantaleone/0000-0002-0692-8630; Manna, Ferdinando/0000-0002-8176-4656; ALLOCCA, Vincenzo/0000-0001-7146-2438					15	2	2	0	7	SOC GEOLOGICA ITALIANA	ROME	UNIV DEGLI STUDI LA SAPIENZA, DIPART SCI DELLA TERRA, PIAZZALE ALDO MORO 5, ROME, I-00185, ITALY	2035-8008			REND ONLINE SOC GEOL	Rend. Online Soc. Geol. Ital.	APR	2015	35
J	Shams, A				Shams, Ahmed			A rediscovered-new 'Qanat' system in the High Mountains of Sinai Peninsula, with Levantine reflections	JOURNAL OF ARID ENVIRONMENTS			English	Article						Foggara; Irrigation; Levant; Qanat; Sinai Peninsula	ORIGIN	Since the Achaemenid Empire in 532-332 BCE, the 'Qanat' became the central irrigation system in the arid and semi-arid lands. Several terms are used for 'Qanat' in different regions, including the Karez, Qanat, Falaj type Daudi, Qanat Romani, Fuqara (Foggara), or Khettara as known in Central Asia, Persia, Southeast Arabia, Levant, North Africa, or Morocco respectively. Typically, the ground, spri…	Univ Durham, Dept Archaeol, Durham DH1 3LE, England	Durham University	Shams, A (corresponding author), Univ Durham, Dept Archaeol, Dawson Bldg,South Rd, Durham DH1 3LE, England.	ahmed.shams-el-din@durham.ac.uk		Shams, Ahmed/0000-0002-4787-7630					20	5	6	1	21	ACADEMIC PRESS LTD- ELSEVIER SCIENCE LTD	LONDON	24-28 OVAL RD, LONDON NW1 7DX, ENGLAND	0140-1963	1095-922X		J ARID ENVIRON	J. Arid. Environ.	NOV	2014	110
J	Orengo, HA; Ejarque, A; Albiach, R				Orengo, Hector A.; Ejarque, Ana; Albiach, Rosa			Water management and land-use practices from the Iron-Age to the Roman period in Eastern Iberia	JOURNAL OF ARCHAEOLOGICAL SCIENCE			English	Article						Water management; Ancient agriculture; Iberian; Roman; GIS; Remote sensing; Eastern Iberia		This study investigates water and land usage in the territory of La Carencia, an Ibero-Roman city located near Tuns (Valencia, Spain) in Eastern Iberia. The outstanding political importance of La Carencia during the Iberian Iron-Age period is attested by its large size, the monumental character of its structures and on-site finds. Multidisciplinary and micro-regional landscape work at its territo…	[Orengo, Hector A.] Univ Sheffield, Dept Archaeol, Sheffield S1 4ET, S Yorkshire, England; [Ejarque, Ana] Univ Barcelona, Dept Prehist Ancient Hist & Archaeol, Seminar Prehist Study & Res SERP, Barcelona 08001, Spain; [Albiach, Rosa] Museu Prehist Valencia, Serv Invest Prehist, Valencia 46003, Spain	University of Sheffield; University of Barcelona	Orengo, HA (corresponding author), Univ Sheffield, Dept Archaeol, Northgate House,West St, Sheffield S1 4ET, S Yorkshire, England.	Hector.Orengo@sheffield.ac.uk	Ejarque, Ana/I-7579-2014; Orengo, Hector A./S-3955-2018	Ejarque, Ana/0000-0001-9101-5299; Orengo, Hector A./0000-0002-9385-2370; EJARQUE MONTOLIO, Ana Belen/0000-0002-5559-290X	University of Nottingham	University of Nottingham	The Institut Cartografic Valencia (ICV) provided the LiDAR data. The digital orthophotographs were provided by the ICV and PNOA, Instituto Geografico Nacional. The University of Nottingham awarded the first author a Nottingham Advance Research Fellowship that allowed him to develop this study.		37	7	7	1	29	ACADEMIC PRESS LTD- ELSEVIER SCIENCE LTD	LONDON	24-28 OVAL RD, LONDON NW1 7DX, ENGLAND	0305-4403	1095-9238		J ARCHAEOL SCI	J. Archaeol. Sci.	SEP	2014	49
J	Carlino, S; Somma, R; Troiano, A; Di Giuseppe, MG; Troise, C; De Natale, G				Carlino, S.; Somma, R.; Troiano, A.; Di Giuseppe, M. G.; Troise, C.; De Natale, G.			The geothermal system of Ischia Island (southern Italy): Critical review and sustainability analysis of geothermal resource for electricity generation	RENEWABLE ENERGY			English	Review						Ischia Island; Geothermal resource; Sustainable energy; Heat flow; Fluid advection; Brittle-ductile transition	THERMAL WATERS; HYDROTHERMAL SYSTEMS; CALDERA RESURGENCE; GROUND DEFORMATION; FLUID MIGRATION; VOLCANIC ISLAND; HEAT-FLOW; MODEL; EVOLUTION; EVIDENCES	In this paper we analyze the main available data related to the geothermal system of Ischia Island, starting from the first geothermal exploration in 1939. Our aim is to define a conceptual model of the geothermal reservoir, according to geological, geochemical, geophysical and stratigraphic data. In recent times, the interest on geothermal exploitation for electricity generation in Italy is rapi…	[Carlino, S.; Somma, R.; Troiano, A.; Di Giuseppe, M. G.; Troise, C.; De Natale, G.] Ist Nazl Geofis & Vulcanol, Sez Napoli, Osservatorio Vesuviano, I-80124 Naples, Italy	Istituto Nazionale Geofisica e Vulcanologia (INGV)	Carlino, S (corresponding author), Ist Nazl Geofis & Vulcanol, Sez Napoli, Osservatorio Vesuviano, Via Diocleziano 328, I-80124 Naples, Italy.	stefano.carlino@ov.ingv.it	Troiano, Antonio/M-3347-2014; De Natale, Giuseppe/M-6763-2016; Carlino, Stefano/C-9538-2015; Di Giuseppe, Maria Giulia/AAX-4460-2021; Somma, Renato/G-5976-2014; Troise, Claudia/F-8329-2014	Troiano, Antonio/0000-0001-9071-0900; Carlino, Stefano/0000-0002-3924-3881; Somma, Renato/0000-0002-2227-6054; Troise, Claudia/0000-0001-6555-5777; Di Giuseppe, Maria Giulia/0000-0003-4573-131X; DE NATALE, Giuseppe/0000-0001-8391-2846	ICDP Campi Flegrei Deep Drilling Project CFDDP; PON-MON.I.C.A. project	ICDP Campi Flegrei Deep Drilling Project CFDDP; PON-MON.I.C.A. project	We are grateful to the Editor in Chief Dr. A.A.M. Sayigh for editorial handling and to the anonymous Referees for helpful comments and suggestions. We also would like to thank Dr. R. Isaia, Dr. E. Iannuzzi and Dr. R.M. Toccaceli for their support in providing geological and drillings data. This study has been funded by ICDP Campi Flegrei Deep Drilling Project CFDDP and by PON-MON.I.C.A. project.		81	48	50	0	71	PERGAMON-ELSEVIER SCIENCE LTD	OXFORD	THE BOULEVARD, LANGFORD LANE, KIDLINGTON, OXFORD OX5 1GB, ENGLAND	0960-1481			RENEW ENERG	Renew. Energy	FEB	2014	62
J	De Luca, DA; Destefanis, E; Forno, MG; Lasagna, M; Masciocco, L				De Luca, D. A.; Destefanis, E.; Forno, M. G.; Lasagna, Manuela; Masciocco, L.			The genesis and the hydrogeological features of the Turin Po Plain fontanili, typical lowland springs in Northern Italy	BULLETIN OF ENGINEERING GEOLOGY AND THE ENVIRONMENT			English	Article						Lowland springs (fontanili); Lithostratigraphy; Hydrogeology and water quality; Po River Plain	GROUNDWATER	The fontanili are typical lowland springs that occur in Northern Italy along the transition zone from high to low plain (the fontanili line), due to changes in both the slope surface and the sediment grain size. These resurgences of phreatic water were investigated in the western sector of the Po Plain in the Turin Province. Although the available bibliographic data through 2005 reveal the occurr…	[De Luca, D. A.; Destefanis, E.; Forno, M. G.; Lasagna, Manuela; Masciocco, L.] Univ Turin, Dept Earth Sci, Via Valperga Caluso 35, I-10125 Turin, Italy	University of Turin	Lasagna, M (corresponding author), Univ Turin, Dept Earth Sci, Via Valperga Caluso 35, I-10125 Turin, Italy.	manuela.lasagna@unito.it	Forno, M. Gabriella/AAJ-7140-2021; Lasagna, Manuela/H-5502-2019; De+Luca, Domenico/ABD-7235-2020	Lasagna, Manuela/0000-0003-3464-2370; DESTEFANIS, Enrico/0000-0001-7106-7382; Forno, M. Gabriella/0000-0002-1482-3388					45	50	51	0	22	SPRINGER HEIDELBERG	HEIDELBERG	TIERGARTENSTRASSE 17, D-69121 HEIDELBERG, GERMANY	1435-9529	1435-9537		B ENG GEOL ENVIRON	Bull. Eng. Geol. Environ.	MAY	2014	73	2
J	De Feo, G; Angelakis, AN; Antoniou, GP; El-Gohary, F; Haut, B; Passchier, CW; Zheng, XY				De Feo, Giovanni; Angelakis, Andreas N.; Antoniou, Georgios P.; El-Gohary, Fatma; Haut, Benoit; Passchier, Cees W.; Zheng, Xiao Yun			Historical and Technical Notes on Aqueducts from Prehistoric to Medieval Times	WATER			English	Review						Aqua Claudia; Aqua Marcia; Aspendos; Byzantines; Eupalinos; Gier; Hellenes; Knossos; Nimes; Minoan; Pergamon; Romans; Segovia; Valens	COMPUTATIONAL FLUID-DYNAMICS; WATER MANAGEMENT; URBAN WATER; SYSTEM; MINOAN; CITY; LIFE	The aim of this paper is to present the evolution of aqueduct technologies through the millennia, from prehistoric to medieval times. These hydraulic works were used by several civilizations to collect water from springs and to transport it to settlements, sanctuaries and other targets. Several civilizations, in China and the Americas, developed water transport systems independently, and brought …	[De Feo, Giovanni] Univ Salerno, Dept Ind Engn, I-84084 Fisciano, SA, Italy; [Angelakis, Andreas N.] Natl Fdn Agr Res NAGREF, Inst Iraklion, Iraklion 71307, Greece; [Antoniou, Georgios P.] Inst Educ Technol, Athens 11474, Greece; [El-Gohary, Fatma] Natl Res Ctr, Water Pollut Res Dept, Cairo 11787, Egypt; [Haut, Benoit] Univ Libre Bruxelles, Chem Engn Unit, B-1050 Brussels, Belgium; [Passchier, Ce…	University of Salerno; University of West Attica; Egyptian Knowledge Bank (EKB); National Research Centre (NRC); Universite Libre de Bruxelles; Johannes Gutenberg University of Mainz	De Feo, G (corresponding author), Univ Salerno, Dept Ind Engn, Via Giovanni Paolo 2,132, I-84084 Fisciano, SA, Italy.	g.defeo@unisa.it; info@a-angelakis.gr; antonioug@tee.gr; fgohary@hotmail.com; bhaut@ulb.ac.be; cpasschi@uni-mainz.de; zhengxy68@163.com	De Feo, Giovanni/J-7435-2012	De Feo, Giovanni/0000-0002-0696-0569; el-Gohary, fatma/0000-0002-5056-925X; Haut, Benoit/0000-0002-3021-0207					84	35	35	1	45	MDPI	BASEL	ST ALBAN-ANLAGE 66, CH-4052 BASEL, SWITZERLAND	2073-4441			WATER-SUI	Water	DEC	2013	5	4
J	Voudouris, KS; Christodoulakos, Y; Steiakakis, E; Angelakis, AN				Voudouris, Konstantinos S.; Christodoulakos, Yiannis; Steiakakis, Emmanouil; Angelakis, Andreas N.			Hydrogeological Characteristics of Hellenic Aqueducts-Like Qanats	WATER			English	Review						aqueducts; Crete; foggara; Hellas; Polyrrhenia; qanat; Rhodes; Serres		In ancient Hellas, water management began in the early Minoan Era (ca. 3200-1100 BC) and was related to the geomorphology, the geology, the topography, and the local climatic, hydrological, and socio-political conditions. Historical and archaeological evidences show that ancient Greeks had developed even qanat-related technologies since the Classical times. During democratic periods, the focus of…	[Voudouris, Konstantinos S.] Aristotle Univ Thessaloniki, Sch Geol, Lab Engn Geol & Hydrogeol, GR-54124 Thessaloniki, Greece; [Christodoulakos, Yiannis] Minist Culture, Dept Antiqu 25, Khania 73134, Greece; [Steiakakis, Emmanouil] Tech Univ Crete, Mineral Resources Engn Dept, Khania 73134, Greece; [Angelakis, Andreas N.] Natl Agr Res Fdn, Inst Iraklion, Iraklion 71307, Greece; [Angelakis, Andreas…	Aristotle University of Thessaloniki; Technical University of Crete	Voudouris, KS (corresponding author), Aristotle Univ Thessaloniki, Sch Geol, Lab Engn Geol & Hydrogeol, GR-54124 Thessaloniki, Greece.	kvoudour@geo.auth.gr; gchkeepka@yahoo.gr; stiakaki@mred.tuc.gr; info@a-angelakis.gr		Voudouris, Konstantinos/0000-0002-5409-1740					33	29	29	0	27	MDPI AG	BASEL	POSTFACH, CH-4005 BASEL, SWITZERLAND	2073-4441			WATER-SUI	Water	SEP	2013	5	3
J	Yenigün, K; Kürkçüoglu, AC; Yazgan, MS; Gerger, R; Ülgen, U				Yenigun, Kasim; Kurkcuoglu, A. Cihat; Yazgan, Mustafa S.; Gerger, Resit; Ulgen, Ugur			From ancient times to the present: development of the drinking water supply system of Sanliurfa in south-eastern Turkey	WATER SCIENCE AND TECHNOLOGY-WATER SUPPLY			English	Article						ancient times; Edessa; Urfa; water structures		In this paper, water supply, distribution and storage structures in S,anliurfa city that were built since the ancient times are investigated and technological details of some water supply structures are given. The city is one of the oldest cities and has hosted many civilizations throughout the centuries, beginning from 11500 BC. The acquired archaeological heritage shows that the city had import…	[Yenigun, Kasim; Gerger, Resit] Harran Univ, Civil Eng Dept, Sanliurfa, Turkey; [Kurkcuoglu, A. Cihat] Harran Univ, Hist Arts Dept, Sanliurfa, Turkey; [Yazgan, Mustafa S.] Istanbul Tech Univ, Environm Eng Dept, TR-80626 Istanbul, Turkey; [Ulgen, Ugur] Dokuz Eylul Univ, Civil Eng Dept, Izmir, Turkey	Harran University; Harran University; Istanbul Technical University; Dokuz Eylul University	Yenigün, K (corresponding author), Harran Univ, Civil Eng Dept, Osmanbey Campus, Sanliurfa, Turkey.	kyenigun@harran.edu.tr	Gerger, Reşit/AAZ-4934-2020; yazgan, Mustafa s/E-6957-2011; Yenigun, Kasim/AAK-8216-2020; YENIGUN, KASIM/E-2883-2016	Gerger, Reşit/0000-0002-8654-4310;					14	0	0	0	17	IWA PUBLISHING	LONDON	ALLIANCE HOUSE, 12 CAXTON ST, LONDON SW1H0QS, ENGLAND	1606-9749			WATER SCI TECH-W SUP	Water Sci. Technol.-Water Supply		2013	13	3
J	De Feo, G; Ribera, F; Abbondandolo, S; De Gisi, S				De Feo, G.; Ribera, F.; Abbondandolo, S.; De Gisi, S.			What lessons can be learnt from studying a Roman hydraulic structure in a little village in Southern Italy?	WATER SCIENCE AND TECHNOLOGY-WATER SUPPLY			English	Article						cisterns; fountains; galleries; Roman; sustainability		The aim of this paper is to study a Roman hydraulic structure in a little village in Southern Italy in order to learn some lessons from the past and identify potential ideas for implementation. Despite increasing global urbanization a significant percentage of people inhabiting inland areas need critical infrastructure service including water supply systems. The fountain system under consideratio…	[De Feo, G.] Univ Salerno, Dept Ind Engn, I-84084 Fisciano, SA, Italy; [Ribera, F.] Univ Salerno, Dept Civil Engn, I-84084 Fisciano, SA, Italy	University of Salerno; University of Salerno	De Feo, G (corresponding author), Univ Salerno, Dept Ind Engn, Via Ponte don Melillo, I-84084 Fisciano, SA, Italy.	g.defeo@unisa.it	De Feo, Giovanni/J-7435-2012; De Gisi, Sabino/H-6081-2019	De Feo, Giovanni/0000-0002-0696-0569; De Gisi, Sabino/0000-0001-7264-4241; RIBERA, Federica/0000-0002-9349-1093					9	0	0	0	5	IWA PUBLISHING	LONDON	ALLIANCE HOUSE, 12 CAXTON ST, LONDON SW1H0QS, ENGLAND	1606-9749			WATER SCI TECH-W SUP	Water Sci. Technol.-Water Supply		2013	13	3
J	Ertürk, AEB; Seker, DZ; Öztürk, I				Erturk, A. Esra Bolukbasi; Seker, Dursun Zafer; Ozturk, Izzet			Ottoman period water structures and water-related architecture: examples in Safranbolu, Turkey	WATER SCIENCE AND TECHNOLOGY-WATER SUPPLY			English	Article						aqueduct; Ottoman water structures; pool rooms; Safranbolu; water gauge		Safranbolu is known for the abundance of its water resources. The city is a unique and historic settlement that hosts very beautiful examples of traditional Turkish architecture. The city attracts both national and international tourists. In this paper, firstly the Ottoman period water supply structures of Safranbolu are described. Incekaya Aqueduct and water transmission system, also known as th…	[Erturk, A. Esra Bolukbasi] Karabuk Univ, Div Architectural Hist, Fac Fine Arts & Architecture, Karabuk, Turkey; [Seker, Dursun Zafer] Istanbul Tech Univ, Dept Geomat Engn, Fac Civil Engn, TR-80626 Istanbul, Turkey; [Ozturk, Izzet] Istanbul Tech Univ, Dept Environm Engn, Fac Civil Engn, TR-80626 Istanbul, Turkey	Karabuk University; Istanbul Technical University; Istanbul Technical University	Ertürk, AEB (corresponding author), Karabuk Univ, Div Architectural Hist, Fac Fine Arts & Architecture, Karabuk, Turkey.	esrabolukbasi@karabuk.edu.tr	Seker, Dursun Zafer/ABA-7384-2020; Seker, Dursun Zafer/ADI-6813-2022; Ozturk, Izzet/ABC-3403-2020	Seker, Dursun Zafer/0000-0001-7498-1540; Seker, Dursun Zafer/0000-0001-7498-1540; Ozturk, Izzet/0000-0002-8274-5326					18	1	1	0	6	IWA PUBLISHING	LONDON	ALLIANCE HOUSE, 12 CAXTON ST, LONDON SW1H0QS, ENGLAND	1606-9749			WATER SCI TECH-W SUP	Water Sci. Technol.-Water Supply		2013	13	3
J	Mehta, VK; Haden, VR; Joyce, BA; Purkey, DR; Jackson, LE				Mehta, Vishal K.; Haden, Van R.; Joyce, Brian A.; Purkey, David R.; Jackson, Louise E.			Irrigation demand and supply, given projections of climate and land-use change, in Yolo County, California	AGRICULTURAL WATER MANAGEMENT			English	Article						Water resources models; Adaptation; WEAP; Agriculture; Cache Creek	WATER MANAGEMENT; CHANGE IMPACTS; HYDROLOGY; TEMPERATURE; SCENARIOS	We assess the potential effects of climate change and adaptive management on irrigation water supply in the Cache Creek watershed in California. Our model, built using the Water Evaluation And Planning (WEAP) system, is calibrated using historical data (1971-2000) on streamflow, irrigation deliveries, and reservoir operations. We examine three adaptation scenarios to 2099: (1) changes in cropping…	[Mehta, Vishal K.; Joyce, Brian A.; Purkey, David R.] Stockholm Environm Inst, Davis, CA 95616 USA; [Haden, Van R.] Univ Calif Davis, Agr Sustainabil Inst, Davis, CA 95616 USA; [Jackson, Louise E.] Univ Calif Davis, Dept Land Air & Water Resources, Davis, CA 95616 USA	University of California System; University of California Davis; University of California System; University of California Davis	Mehta, VK (corresponding author), Stockholm Environm Inst, 400 F St, Davis, CA 95616 USA.	vishal.mehta@sei-us.org; vhaden@ucdavis.edu; brian.joyce@sei-us.org; david.purkey@sei-us.org; lejackson@ucdavis.edu			California Energy Commission PIER Climate Change Program	California Energy Commission PIER Climate Change Program	We thank Tim O'Halloran, Max Stevenson and the staff of the Yolo County Flood Control and Water Conservation District for their generous contributions of data, time and insight toward this project. Research funding support from the California Energy Commission PIER Climate Change Program is gratefully acknowledged. We appreciate also the helpful comments and suggestions of two anonymous reviewers.		58	79	91	2	134	ELSEVIER	AMSTERDAM	RADARWEG 29, 1043 NX AMSTERDAM, NETHERLANDS	0378-3774	1873-2283		AGR WATER MANAGE	Agric. Water Manage.	JAN 31	2013	117
J	Katsanou, K; Siavalas, G; Lambrakis, N				Katsanou, K.; Siavalas, G.; Lambrakis, N.			The thermal and mineral springs of Aitoloakarnania Prefecture: function mechanism and origin of groundwater	ENVIRONMENTAL EARTH SCIENCES			English	Article						Alkaline waters; Trace elements; Fluoride; Residence time; Saturation indices	IONIAN ZONE; EVOLUTION; GREECE; AREA; GEOCHEMISTRY; STRATIGRAPHY; KINEMATICS; BEHAVIOR; ELEMENTS; NEOGENE	The study area is located in the northwestern part of Greece, in Aitoloakarnania prefecture. In this region, where no volcanic activity exists, thermal springs such as Kremasta and Kokkino Stefani, well-known for their healing properties occur. The objective of this study was the investigation of these springs, as well as the study of the chemical composition and origin of water. Relationships be…	[Katsanou, K.; Siavalas, G.; Lambrakis, N.] Univ Patras, Dept Geol, Rion 26504, Greece	University of Patras	Katsanou, K (corresponding author), Univ Patras, Dept Geol, Rion 26504, Greece.	katsanou@upatras.gr	Katsanou, Konstantina/AAF-8682-2020	Katsanou, Konstantina/0000-0003-2880-6244					57	7	7	0	17	SPRINGER	NEW YORK	ONE NEW YORK PLAZA, SUITE 4600, NEW YORK, NY, UNITED STATES	1866-6280	1866-6299		ENVIRON EARTH SCI	Environ. Earth Sci.	APR	2012	65	8
J	Desiderio, G; D'arcevia, CFV; Nanni, T; Rusi, S				Desiderio, Giovanni; D'arcevia, Clemente Folchi Vici; Nanni, Torquato; Rusi, Sergio			Hydrogeological mapping of the highly anthropogenically influenced Peligna Valley intramontane basin (Central Italy)	JOURNAL OF MAPS			English	Article						hydrogeological cartography; hydrodynamics; hydrochemistry; intramontane plain; aquifer vulnerability; potential and real pollution sources; Peligna Valley; Central Italy		This paper presents hydrogeological mapping of the Peligna Valley (Central Italy) intramontane basin. The basin is hydrogeologically complex due to the significant surface and underground water resources which are extensively used for potable, industrial, agricultural and healing purposes. The basin history is characterised by significant fluvio-lacustrine deposition whose thickness can reach as …	[Desiderio, Giovanni; Rusi, Sergio] Gabriele dAnnunzio Univ, Dept Ingn & Geol, Chieti, Italy; [D'arcevia, Clemente Folchi Vici; Nanni, Torquato] Polytech Univ Marche, Dept Sci & Ingn Mat Ambiente & Urbanist, Ancona, Italy	G d'Annunzio University of Chieti-Pescara; Marche Polytechnic University	Rusi, S (corresponding author), Gabriele dAnnunzio Univ, Dept Ingn & Geol, Chieti, Italy.	s.rusi@unich.it	Rusi, Sergio/O-6138-2017	Rusi, Sergio/0000-0003-0512-5614					14	15	15	0	17	TAYLOR & FRANCIS LTD	ABINGDON	2-4 PARK SQUARE, MILTON PARK, ABINGDON OR14 4RN, OXON, ENGLAND	1744-5647			J MAPS	J. Maps		2012	8	2
J	Frisone, F				Frisone, Flavia			Rivers, land organization, and identity in Greek Western Apoikiai	MEDITERRANEAN HISTORICAL REVIEW			English	Article						Greek colonization; landscape; river; waterways; fluvial valleys		The present article looks at the so-called 'archaic Greek colonization', and at the connection of the settlements with the territories they occupied, from the perspective of their relationship with water - the water of the sea, but mainly that of rivers and springs. The springs and, even more importantly, the rivers that traversed the places where the new Hellenic communities established themselv…	Univ Salento, Dipartimento Beni Culturali, Lecce, Italy	University of Salento	Frisone, F (corresponding author), Univ Salento, Dipartimento Beni Culturali, Lecce, Italy.	flavia.frisone@unisalento.it							99	1	1	0	6	ROUTLEDGE JOURNALS, TAYLOR & FRANCIS LTD	ABINGDON	2-4 PARK SQUARE, MILTON PARK, ABINGDON OX14 4RN, OXON, ENGLAND	0951-8967	1743-940X		MEDITERR HIST REV	Mediterr. Hist. Rev.		2012	27	1
C	Ataberk, E; Baykal, F		Efe, R; Ozturk, M		Ataberk, Emre; Baykal, Fusun			Utilization of natural and cultural resources of Dikili (Izmir) for tourism	2ND INTERNATIONAL GEOGRAPHY SYMPOSIUM-MEDITERRANEAN ENVIRONMENT 2010	Procedia Social and Behavioral Sciences		English	Proceedings Paper	2nd International Geography Symposium-Mediterranean Environment	JUN 02-05, 2010	Antalya, TURKEY			Touristic product; thermal tourism; rural tourism; Dikili		Agriculture, fishing, greenhousing, carpet manufacturing, granite stone engraving and tourism are the primary sources of income in Dikili, Izmir. Tourism started to develop in the region since the 1980s and recently, coastal tourism and domestic tourism have gained importance. The aim of this paper is to demonstrate that beside coasts where coastal tourism takes place, Dikili, has natural and cul…	[Ataberk, Emre] Ege Univ, Program Tourism & Hotel Management, TR-35700 Izmir, Turkey; [Baykal, Fusun] Ege Univ, Fac Letters, Dept Geography, TR-35100 Izmir, Turkey	Ege University; Ege University	Ataberk, E (corresponding author), Ege Univ, Program Tourism & Hotel Management, TR-35700 Izmir, Turkey.	emre.ataberk@ege.edu.tr	Ataberk, Emre/AAM-8553-2021; Baykal, Fusun/AAG-5008-2019						11	9	9	1	24	ELSEVIER SCIENCE BV	AMSTERDAM	SARA BURGERHARTSTRAAT 25, PO BOX 211, 1000 AE AMSTERDAM, NETHERLANDS	1877-0428			PROCD SOC BEHV			2011	19
J	Rugani, B; Pulselli, RM; Niccolucci, V; Bastianoni, S				Rugani, B.; Pulselli, R. M.; Niccolucci, V.; Bastianoni, S.			Environmental performance of a XIV Century water management system: An emergy evaluation of cultural heritage	RESOURCES CONSERVATION AND RECYCLING			English	Article						Bottini; Cultural heritage; Emergy; Environmental accounting; Water management	SUSTAINABILITY; TRANSFORMITY; PROVINCE; SIENA	In the late Middle Ages, the city of Siena (Italy) had a high population density and had to face the problem of supplying water within the city walls for housing, crafts, economic and commercial activities, as well as for the risk of fire. A network of underground drifts, namely Bottini, was then built, achieving a total length of about 25 km in the late XIV Century. The Bottini have been capturi…	[Rugani, B.; Pulselli, R. M.; Niccolucci, V.; Bastianoni, S.] Univ Siena, Dept Chem, Ecodynam Grp, I-53100 Siena, Italy; [Rugani, B.; Niccolucci, V.] La Diana Assoc, I-53100 Siena, Italy	University of Siena	Niccolucci, V (corresponding author), Univ Siena, Dept Chem, Ecodynam Grp, Via Diana 2A, I-53100 Siena, Italy.	valentina.niccolucci@unisi.it	Bastianoni, Simone/K-6721-2015; RUGANI, Benedetto/C-4498-2012; Niccolucci, Valentina/L-5510-2015; Rugani, Benedetto/E-8074-2017	Bastianoni, Simone/0000-0002-6470-7377; Niccolucci, Valentina/0000-0002-4484-9263; Rugani, Benedetto/0000-0002-3525-1382; Pulselli, Riccardo Maria/0000-0001-8340-4040					37	11	12	2	37	ELSEVIER SCIENCE BV	AMSTERDAM	PO BOX 211, 1000 AE AMSTERDAM, NETHERLANDS	0921-3449			RESOUR CONSERV RECY	Resour. Conserv. Recycl.	NOV	2011	56	1
J	Özer, S; Demircan, N				Ozer, Serkan; Demircan, Neslihan			Place of fountains in urban space: A case study in Erzurum city, Turkey	JOURNAL OF FOOD AGRICULTURE & ENVIRONMENT			English	Article						Fountain; city identity; preservation; classification; Erzurum		Due to the importance of water for humans, special structures were constructed at the points where water was supplied and called fountains. Fountains are the structures taking an important part in Turkish culture and constructed on roadsides from where people can provide water brought through special pipes ending with a tap and poured in a small reservoir. In Anatolian lands, majority of the foun…	[Ozer, Serkan; Demircan, Neslihan] Ataturk Univ, Landscape Architecture Dept, Fac Agr, TR-25240 Erzurum, Turkey	Ataturk University	Özer, S (corresponding author), Ataturk Univ, Landscape Architecture Dept, Fac Agr, TR-25240 Erzurum, Turkey.	sozer2000@hotmail.com	Demircan, Neslihan/A-4617-2016						15	1	1	0	3	WFL PUBL	HELSINKI	MERI-RASTILANTIE 3 C, HELSINKI, FI-00980, FINLAND	1459-0255			J FOOD AGRIC ENVIRON	J. Food Agric. Environ.	JUL-OCT	2010	8	3-4	2
C	Pulselli, RM; Rugani, B; Tiezzi, E; Marchettini, N		Hernandez, S; Brebbia, CA; DeWilde, WP		Pulselli, R. M.; Rugani, B.; Tiezzi, E.; Marchettini, N.			An emergy evaluation of a medieval water management system: the case of the underground Bottini in Siena (Italy)	ECO-ARCHITECTURE III: HARMONISATION BETWEEN ARCHITECTURE AND NATURE	WIT Transactions on Ecology and the Environment		English	Proceedings Paper	3rd International Conference on Harmonisation between Architecture and Nature	APR 12-14, 2010	A Coruna, SPAIN	Wessex Inst Technol,WIT Transact Ecol & Environm		cultural heritage; energy systems diagrams; water management		In the middle ages, Siena had a high population density and had to face the problem of water supply within the city walls for housing, crafts, industrial activities and fire risks. With this aim, a series of underground drifts, namely Bottini, was built at the beginning of the 13th century and achieved a total length of 25 km in the 14th century. Bottini have been capturing rain water and conduct…	[Pulselli, R. M.; Rugani, B.; Tiezzi, E.; Marchettini, N.] Univ Siena, Dept Chem, Ecodynam Grp, I-53100 Siena, Italy	University of Siena			Marchettini, Nadia/N-2281-2015; Rugani, Benedetto/E-8074-2017	Marchettini, Nadia/0000-0002-2631-9306; Rugani, Benedetto/0000-0002-3525-1382; Pulselli, Riccardo Maria/0000-0001-8340-4040					12	1	1	1	12	WIT PRESS	SOUTHAMPTON	ASHURST LODGE, SOUTHAMPTON SO40 7AA, ASHURST, ENGLAND	1743-3541		978-1-84564-430-7	WIT TRANS ECOL ENVIR	WIT Trans. Ecol. Environ.		2010	128
J	Stevanovic, Z; Eftimi, R				Stevanovic, Zoran; Eftimi, Romeo			Karstic sources of water supply for large consumers in southeastern Europe - sustainability, disputes and advantages	GEOLOGIA CROATICA			English	Article						karst; aquifer; water supply; groundwater control; SE Europe		Southeastern Europe is known worldwide as classic karst terrain. In the Alpine orogenic belt the karstified carbonate rocks are either dominant, as in the Dinarides, or widely distributed, as in the Carpathian-Balkans, Hellenides or Pindes. Concerning karstic groundwater resources, this region is by far the richest in all of Europe. Some areas, such as southern Montenegro, are characterized by an…	[Stevanovic, Zoran] Univ Belgrade, Dept Hydrogeol, Ctr Karst Hydrogeol, Fac Min & Geol, Belgrade, Serbia; [Eftimi, Romeo] ITA Consult, Tirana, Albania	University of Belgrade	Stevanovic, Z (corresponding author), Univ Belgrade, Dept Hydrogeol, Ctr Karst Hydrogeol, Fac Min & Geol, Djusina 7, Belgrade, Serbia.	zstev@eunet.rs; eftimi@sanx.net	Stevanovic, Zoran/AAR-2078-2020						26	10	10	0	11	CROATIAN GEOLOGICAL SURVEY	ZAGREB	SACHSOVA 2, POB 268, ZAGREB, HR-10000, CROATIA	1330-030X	1333-4875		GEOL CROAT	Geol. Croat.		2010	63	2
J	Theodossiou, E; Katsiotis, M; Manimanis, VN; Mantarakis, P				Theodossiou, E.; Katsiotis, M.; Manimanis, V. N.; Mantarakis, P.			THE LARGE BUILT WATER CLOCK OF AMPHIARAEION	MEDITERRANEAN ARCHAEOLOGY & ARCHAEOMETRY			English	Article						water clocks; Ancient Greece; Oropos; Attica		A very well preserved ancient water clock was discovered during excavations at the Amphiaraeion, in Oropos, Greece. The Amphiaraeion, a famous religious and oracle center of the deified healer Amphiaraus, was active from the pre-classic period until the replacement of the ancient religion by Christianity in the 5(th) Century A.D.. The foretelling was supposedly done through dreams sent by the god…	[Theodossiou, E.; Manimanis, V. N.] Univ Athens, Fac Phys, Dept Astrophys Astron & Mech, Zografos 15784, Greece; [Katsiotis, M.] Natl Tech Univ Athens, Athens, Greece	National & Kapodistrian University of Athens; National Technical University of Athens	Theodossiou, E (corresponding author), Univ Athens, Fac Phys, Dept Astrophys Astron & Mech, Zografos 15784, Greece.	etheodos@phys.uoa.gr							17	5	5	0	2	UNIV AGEAN, DEPT MEDITERRANEAN STUD	RHODES	1 DEMOKRATIAS AV, RHODES, 85100, GREECE	1108-9628			MEDITERR ARCHAEOL AR	Mediterr. Archaeol. Archaeom.		2010	10	1
J	Clendenon, C				Clendenon, Cindy			KARST HYDROLOGY IN ANCIENT MYTHS FROM ARCADIA AND ARGOLIS, GREECE	ACTA CARSOLOGICA			English	Article						hydromythology; geomythology; history of karstology; ancient water tracing; Greece	HYDROGEOLOGY; HISTORY	Cindy Clendenon: Karst Hydrology in Ancient Myths from Arcadia and Argolis, Greece The history of karst science includes ancient Greek literary narratives that describe the behavior of karstic waters, yet remain largely unrecognized for their hydrogeological relevance. This paper integrates karst hydrology with ancient myth and travelogues describing natural features in Arcadia and Argolis of the…	Fineline Sci Press, Michigan Dept Environm Qual, Lansing, MI 48901 USA		Clendenon, C (corresponding author), Fineline Sci Press, Michigan Dept Environm Qual, POB 10014, Lansing, MI 48901 USA.	c2editor@bloombb.com							53	14	15	0	9	KARST RESEARCH INST ZRC SAZU	POSTOJNA	TITOV TRG 2, POSTOJNA, SI-6230, SLOVENIA	0583-6050	1580-2612		ACTA CARSOLOGICA	ACTA CARSOLOGICA		2009	38	1
J	Clendenon, C				Clendenon, Cindy			ANCIENT GREEK HYDROMYTHS ABOUT THE SUBMARINE TRANSPORT OF TERRESTRIAL FRESH WATER THROUGH SEABEDS OFFSHORE OF KARSTIC REGIONS	ACTA CARSOLOGICA			English	Article						submarine groundwater discharge; submarine karst springs; coastal karst aquifers; hydromythology; geomythology; history of karstology	UNITED-STATES; GROUNDWATER; HYDROGEOLOGY; INTERFACE	Cindy Clendenon: Ancient Greek Hydromyths About the Submarine Transport of Terrestrial Fresh Water Through Seabeds Offshore of Karstic Regions This Study examined the relationship between ancient Greek texts and the physical possibility Of focused, distal flow of terrestrial fresh water through the seabed, particularly offshore of karstic coasts. The four ancient texts which were analyzed describ…	Fineline Sci Press, Michigan Dept Environm Qual, Lansing, MI 48901 USA		Clendenon, C (corresponding author), Fineline Sci Press, Michigan Dept Environm Qual, POB 10014, Lansing, MI 48901 USA.	c2editor@bloombb.com							42	7	7	0	8	KARST RESEARCH INST ZRC SAZU	POSTOJNA	TITOV TRG 2, POSTOJNA, SI-6230, SLOVENIA	0583-6050	1580-2612		ACTA CARSOLOGICA	ACTA CARSOLOGICA		2009	38	2-3
C	Aringoli, D; Farabollini, P; Gentili, B; Materazzi, M; Pambianchi, G		DeDapper, M; Vermeulen, F; Deprez, S; Taelman, D		Aringoli, D.; Farabollini, P.; Gentili, B.; Materazzi, M.; Pambianchi, G.			GEOMORPHOLOGICAL EVIDENCES OF NATURAL DISASTERS IN THE ROMAN ARCHAEOLOGICAL SITE OF CARSULAE (TIBER BASIN - CENTRAL ITALY)	OL' MAN RIVER: GEO-ARCHAELOGICAL ASPECTS OF RIVERS AND RIVER PLAINS	Archaeological Reports Ghent University		English	Proceedings Paper	Meeting on Ol'Man River - Geo-Archaelogical Aspects of Rivers and River Plains	SEP 22-24, 2006	Gent, BELGIUM			Geo-archaeology; Travertine; Karst processes; Mass movements; Carsulae; Italy	TRAVERTINES; MORPHOLOGY; APENNINES; TURKEY	The Roman town of Carsulae was founded after the construction of the Flaminia Road, whose track was studied by Caius Flaminius between 220 and the 219 BCE (Before Common Era). The road was realized with the aim to connect Rome with the Adriatic coast. Probably arisen from the union of several communities, the importance of Carsulae, testified since the Ist century BCE by Strabo, Pliny the Younger…	[Aringoli, D.; Farabollini, P.; Gentili, B.; Materazzi, M.; Pambianchi, G.] Univ Camerino, Dipartimento Sci Terra, I-62032 Camerino, Italy	University of Camerino		Domenico.Aringoli@unicam.it; piero.farabollini@unicam.it; Bernardino.Gentili@unicam.it; marco.materazzi@unicam.it; gilberto.pambianchi@unicam.it	MATERAZZI, Marco/AAW-9303-2020; Aringoli, Domenico/C-1159-2013	MATERAZZI, Marco/0000-0002-9480-5680;					33	3	3	0	3	ACADEMIA PRESS	GHENT	GHENT, BELGIUM			978-90-382-1404-7	ARCHAEOL REP GHENT			2009	5
B	Naclerio, G; Celico, F		Meijer, D; DeJong, F		Naclerio, Gino; Celico, Fulvio			SPRING PROTECTION AGAINST MICROBIAL CONTAMINATION IN COMPARTMENTALIZED CARBONATE AQUIFERS, CENTRAL-SOUTHERN ITALY	ENVIRONMENTAL REGULATION: EVALUATION, COMPLIANCE AND ECONOMIC IMPACT	Environmental Health Physical Chemical and Biological Factors		English	Article; Book Chapter							DRASTIC-BASED METHOD; LIMESTONE AQUIFERS; GROUNDWATER; POLLUTION; BEHAVIOR; EPIKARST; TOPSOIL	Recent researches in central-southern Italy demonstrated that carbonate aquifers may behave as compartmentalized systems, due to the barrier action of some low-permeability fault zones that partially impede groundwater flow. This conceptual model is different from models generally applied in karst aquifers where faults act as drains, due to their enhanced hydraulic conductivity. Due to this disco…	[Naclerio, Gino; Celico, Fulvio] Univ Molise, Groundwater Res Ctr, I-86090 Pesche, IS, Italy	University of Molise	Naclerio, G (corresponding author), Univ Molise, Groundwater Res Ctr, I-86090 Pesche, IS, Italy.	naclerio@unimol.it; celico@unimol.it	Celico, Fulvio/A-5043-2008; Naclerio, Gino/A-5692-2008	NACLERIO, GINO/0000-0001-7489-4455					14	0	0	0	2	NOVA SCIENCE PUBLISHERS, INC	HAUPPAUGE	400 OSER AVE, STE 1600, HAUPPAUGE, NY 11788-3635 USA			978-1-60741-645-6	ENV HEALTH PHYS CHEM			2009
C	Bayram, AF; Ozdemir, A; Ucgun, F; Kansun, G			SGEM	Bayram, A. Ferhat; Ozdemir, Adil; Ucgun, Fatih; Kansun, Gursel			NUMERICAL ANALYSIS OF WATER WELL DRILLING SECTOR OF TURKEY	SGEM 2008: 8TH INTERNATIONAL SCIENTIFIC CONFERENCE, VOL I, CONFERENCE PROCEEDINGS: MODERN MANAGEMENT OF MINE PRODUCING GEOLOGY AND ENVIRONMENTAL PROTECTION			English	Proceedings Paper	8th International Scientific Conference on Modern Management of Mine Producing, Geology and Environmental Protection	JUN 16-20, 2008	Sofia, BULGARIA			Drilling; Water Well Drilling; Groundwater; Numerical Analysis		Performing a numerical analysis of water well drilling sector of Turkey was aimed in this study. Within this purpose, number of the machinery in equipment pool of the institutions and companies which are involved in the water well drilling, yearly drilling quantities, drilling equipment preferences and geological data of 2640 water well drilling boreholes opened in 73 provinces between the years …	[Bayram, A. Ferhat; Kansun, Gursel] Selcuk Univ, Fac Architecture & Engn, Konya, Turkey; [Ozdemir, Adil] Adil Ozdemir Drilling & Engn Co, Izmir, Turkey; [Ucgun, Fatih] Special Prov Adm, Agri, Turkey	Selcuk University	Bayram, AF (corresponding author), Selcuk Univ, Fac Architecture & Engn, Konya, Turkey.		Ozdemir (Dr.), Adil/ABB-1620-2020	Ozdemir (Dr.), Adil/0000-0002-3975-2846					3	0	0	0	0	INT SCIENTIFIC CONFERENCE SGEM	SOFIA	14, KILMENT OHRIDSKY BLVD, SOFIA, 1797, BULGARIA			978-954-91818-1-4				2008
J	Olivier, J; Van Niekerk, HJ; Van Der Walt, IJ				Olivier, J.; Van Niekerk, H. J.; Van Der Walt, I. J.			Physical and chemical characteristics of thermal springs in the Waterberg area in Limpopo Province, South Africa	WATER SA			English	Article						thermal springs; Limpopo Province; water temperature; chemical composition; trace elements	MINERAL WATERS; GEOCHEMISTRY; WORLD	The Limpopo Province in South Africa is richly endowed with thermal springs. Some have been developed for recreational, tourism or other purposes, while a number remain completely undeveloped. If the full economic potential of springs can be realised in a sustainable manner, they could make a substantial contribution to the local or even regional economy. The optimal use of a thermal spring is la…	[Olivier, J.; Van Niekerk, H. J.] Dept Environm Sci, ZA-0003 Unisa, South Africa; [Van Der Walt, I. J.] NW Univ, Dept Geog & Environm Studies, ZA-2531 Potchefstroom, South Africa	North West University - South Africa	Olivier, J (corresponding author), Dept Environm Sci, POB 392, ZA-0003 Unisa, South Africa.	olivij@unisa.ac.za	Olivier, Jana J/Q-2125-2016; van Niekerk, HJ/I-1190-2016	Olivier, Jana J/0000-0001-6651-1207; van Niekerk, Elna/0000-0002-2269-0810					81	27	31	0	11	WATER RESEARCH COMMISSION	PRETORIA	PO BOX 824, PRETORIA 0001, SOUTH AFRICA	0378-4738	1816-7950		WATER SA	Water SA	APR	2008	34	2
J	Civita, MV				Civita, Massimo V.			An improved method for delineating source protection zones for karst springs based on analysis of recession curve data	HYDROGEOLOGY JOURNAL			English	Article						groundwater protection zones; karst; recession curve; analytical solutions; Italy		A standard method for delineating source protection zones, particularly for karst and carbonate springs, has been improved. The method, based on recession curve analysis, defines four vulnerability scenarios with an evaluation of the appropriate dimensions of the protection areas, accommodating situations where field-test data are not available. The new approach makes it easier to separate the co…	Politecn Torino, Fac Engn 1, Dept Territorial & Environm Engn & Geotechnol DIT, Turin, Italy	Polytechnic University of Turin	Civita, MV (corresponding author), Politecn Torino, Fac Engn 1, Dept Territorial & Environm Engn & Geotechnol DIT, Turin, Italy.	massimo.civita@polito.it							35	33	37	0	21	SPRINGER	NEW YORK	233 SPRING ST, NEW YORK, NY 10013 USA	1431-2174			HYDROGEOL J	Hydrogeol. J.	AUG	2008	16	5
J	Kucukali, S				Kucukali, S.			How Roman engineers selected their water supplies	PROCEEDINGS OF THE INSTITUTION OF CIVIL ENGINEERS-WATER MANAGEMENT			English	Article						history; hydraulics & hydrodynamics; water supply	TURKEY	An account of a historical Roman water supply system in Zonguldak, northwest Turkey on the Black Sea coast is presented. This ancient water supply system demonstrates Roman engineering expertise in water management and hydraulic engineering applications. Although there is a river located near the Roman city (Filyos) with an average annual discharge of 89 m(3)/s (1970-2005 data), Roman engineers p…	Zonguldak Karaelmas Univ, Zonguldak, Turkey	Bulent Ecevit University	Kucukali, S (corresponding author), Zonguldak Karaelmas Univ, Zonguldak, Turkey.								20	1	1	1	11	THOMAS TELFORD PUBLISHING	LONDON	THOMAS TELFORD HOUSE, 1 HERON QUAY, LONDON E14 4JD, ENGLAND	1741-7589			P I CIVIL ENG-WAT M	Proc. Inst. Civil. Eng.-Water Manag.	DEC	2007	160	4
J	LaMoreaux, PE; LaMoreaux, J				LaMoreaux, Philip E.; LaMoreaux, Jim			Karst: the foundation for concepts in hydrogeology	ENVIRONMENTAL GEOLOGY			English	Article; Proceedings Paper	International Conference on Water Resource and Environmental Problems in Karst	SEP 14-19, 2005	Belgrade, SERBIA			karst spring waters; karst; hydrogeology		Few citizens of the world would have trouble understanding the terms springs, ground water, geology, or hydrology. Newer water terms that are more familiar include bottled water, spring water, sparkling water, or mineral water, all of which now come in vessels of different shapes, sizes, colors and labels. It is interesting to note that a glass of cold, refreshing tap water will cost about 1 cent…	Int Journal Environm Geol, Tuscaloosa, AL 35401 USA; PE LaMoreaux & Assoc, Tuscaloosa, AL 35401 USA		LaMoreaux, PE (corresponding author), Int Journal Environm Geol, 2610 Univ Blvd, Tuscaloosa, AL 35401 USA.	pel@dbtech.net; jlamoreaux@pela.com							0	12	12	2	30	SPRINGER	NEW YORK	233 SPRING ST, NEW YORK, NY 10013 USA	0943-0105			ENVIRON GEOL	Environ. Geol.	JAN	2007	51	5
C	Showleh, T		Angelakis, AN; Koutsoyiannis, D		Showleh, T.			Water management in the bronze age: Greece and Anatolia	Insights into Water Management: Lessons from Water and Wastewater Technologies in Ancient Civilizations	WATER SCIENCE AND TECHNOLOGY: WATER SUPPLY		English	Proceedings Paper	1st IWA International Symposium on Water and Wastewater Technologies in Ancient Civilization	OCT 28-30, 2006	Iraklio, GREECE			kopais; mycenae; Persia; tiryns; Troy		While the water management systems of Minoan Crete are legendary, water management on the Greek mainland in the Mycenaean period also shows a high degree of technological sophistication. Projects considered in this paper include the draining of the Kopais Lake, generally agreed to be one of the greatest engineering achievements of early antiquity; the cistern at Mycenae with its corbelled access …	Concordia Univ, Dept Mech Engn, Montreal, PQ H3G 1M8, Canada	Concordia University - Canada	Showleh, T (corresponding author), Concordia Univ, Dept Mech Engn, Montreal, PQ H3G 1M8, Canada.								9	4	4	1	3	I W A PUBLISHING	LONDON	ALLIANCE HOUSE, 12 CAXTON ST, LONDON SW1H 0QS, ENGLAND	1606-9749		978-1-84339-610-9	WA SCI TECHNOL			2007	7	1
J	Mijatovic, B				Mijatovic, Borivoje			The groundwater discharge in the Mediterranean karst coastal zones and freshwater tapping: set problems and adopted solutions. Case studies	ENVIRONMENTAL GEOLOGY			English	Article; Proceedings Paper	International Conference on Water Resource and Environmental Problems in Karst	SEP 14-19, 2005	Belgrade, SERBIA			Mediterranean basin; coastal zone; submarine karst; Mediterranean		In the karstic regions of the Mediterranean coastal zones the groundwater discharge and its outcrops-the coastal and submarine springs-represent the most typical natural phenomena of littoral karst, the economic potential of which is significant. The case studies discussed in this paper concern the problems of freshwater tapping in karst coastal zones along the Mediterranean littoral. Owing to th…	Geozavod Inst Hydrogeol & Engn Geol, Belgrade 11000, Serbia		Mijatovic, B (corresponding author), Geozavod Inst Hydrogeol & Engn Geol, POB 275, Belgrade 11000, Serbia.	hgig@beotel.yu							5	17	17	0	8	SPRINGER	NEW YORK	233 SPRING ST, NEW YORK, NY 10013 USA	0943-0105			ENVIRON GEOL	Environ. Geol.	JAN	2007	51	5
J	Sayili, M; Akca, H; Duman, T; Esengun, K				Sayili, Murat; Akca, Hasan; Duman, Teoman; Esengun, Kemal			Psoriasis treatment via doctor fishes as part of health tourism: A case study of Kangal Fish Spring, Turkey	TOURISM MANAGEMENT			English	Article						psoriasis treatment; Kangal fish spring; spa tourism in Turkey		Spa (thermal) tourism is gaining increasing importance in health tourism. Turkey has numerous thermal sources that have been used to cure a number of common diseases. Among these thermal sources, Kangal Fish Spring has a unique nature with its doctor fish known to cure psoriasis. To date, a number of studies analyzed Kangal Fish Spring as a thermal source with its water and fish characteristics b…	Gaziosmanpasa Univ, Fac Agr, Dept Agr Econ, TR-60240 Tokat, Turkey; Gaziosmanpasa Univ, Sch Tourism & Hotel Management, TR-60400 Tokat, Turkey	Gaziosmanpasa University; Gaziosmanpasa University	Sayili, M (corresponding author), Gaziosmanpasa Univ, Fac Agr, Dept Agr Econ, TR-60240 Tokat, Turkey.	muratsayili@yahoo.corn; akcabasan@yahoo.corn; tdu@gop.edu.tr; esengunkemal@yahoo.com	AKÇA, Hasan/ABI-4534-2020; Duman, Teoman/X-8960-2019	Duman, Teoman/0000-0001-5977-5036					9	34	37	2	54	ELSEVIER SCI LTD	OXFORD	THE BOULEVARD, LANGFORD LANE, KIDLINGTON, OXFORD OX5 1GB, OXON, ENGLAND	0261-5177	1879-3193		TOURISM MANAGE	Tourism Manage.	APR	2007	28	2
J	Dadaser-Celik, F; Brezonik, PL; Stefan, HG				Dadaser-Celik, Filiz; Brezonik, Patrick L.; Stefan, Heinz G.			Hydrologic Sustainability Of The Sultan Marshes In Turkey	WATER INTERNATIONAL			English	Article						Environmental impact; irrigation; Sultan Marshes; sustainability; wetland; water allocation	ENVIRONMENTAL IMPACTS; IRRIGATED AGRICULTURE	Hydrologic changes in the Sultan Marshes ecosystem, a closed-basin wetland in the semi-arid Develi Basin in south-central Turkey, are analyzed and related to intensification of irrigated agriculture in the catchment. Relationships between water-level changes in the marsh, and inflows and outflows of surface water and groundwater are examined. Since the 1980s, surface runoff from the surrounding m…	[Dadaser-Celik, Filiz] Univ Minnesota, Water Resources Sci Program, Minneapolis, MN 55455 USA; [Brezonik, Patrick L.; Stefan, Heinz G.] Univ Minnesota, Dept Civil Engn, Minneapolis, MN 55455 USA	University of Minnesota System; University of Minnesota Twin Cities; University of Minnesota System; University of Minnesota Twin Cities	Dadaser-Celik, F (corresponding author), Univ Minnesota, Water Resources Sci Program, Minneapolis, MN 55455 USA.		Brezonik, Patrick/ISV-2988-2023; Dadaser-Celik, Filiz/AAE-2824-2019	Dadaser-Celik, Filiz/0000-0003-3623-7723					37	11	11	0	8	ROUTLEDGE JOURNALS, TAYLOR & FRANCIS LTD	ABINGDON	2-4 PARK SQUARE, MILTON PARK, ABINGDON OX14 4RN, OXON, ENGLAND	0250-8060	1941-1707		WATER INT	Water Int.		2007	32	5
J	Güler, C				Guler, Cuneyt			Evaluation of maximum contaminant levels in Turkish bottled drinking waters utilizing parameters reported on manufacturer's labeling and government-issued production licenses	JOURNAL OF FOOD COMPOSITION AND ANALYSIS			English	Article						bottled water; mineral water; drinking water standards; maximum contaminant level; Turkey; food safety	MICROBIOLOGICAL QUALITY; SOLD	A total of 189 domestic brands of bottled water consisting of natural spring, natural mineral, drinking and processed drinking types were evaluated by means of both physical and chemical parameters reported on their manufacturer's labeling and/or in government-issued production licenses. A comparison between the water composition and the maximum contaminant levels imposed by the Turkish legislati…	Mersin Univ, TR-33343 Mersin, Turkey	Mersin University	Güler, C (corresponding author), Mersin Univ, Ciftlikkoy Kampusu, TR-33343 Mersin, Turkey.	cguler@mersin.edu.tr	GÜLER, CÜNEYT/A-7755-2008	GÜLER, CÜNEYT/0000-0001-8821-6532					24	59	60	0	8	ACADEMIC PRESS INC ELSEVIER SCIENCE	SAN DIEGO	525 B ST, STE 1900, SAN DIEGO, CA 92101-4495 USA	0889-1575	1096-0481		J FOOD COMPOS ANAL	J. Food Compos. Anal.	MAY	2007	20	3-4
J	Etiope, G; Papatheodorou, G; Christodoulou, D; Geraga, M; Favali, P				Etiope, G.; Papatheodorou, G.; Christodoulou, D.; Geraga, M.; Favali, P.			The geological links of the ancient Delphic Oracle (Greece): A reappraisal of natural gas occurrence and origin	GEOLOGY			English	Article						Delphi; gas; seeps; fault; methane; ethylene		Recent studies have speculated that the prophetic powers of Pythia, the woman of the Delphic Oracle, at the Temple of Apollo in Greece, were induced by hydrocarbon vapors, specifically ethylene, rising from bedrock fissures at the intersection of the E-W Delphi fault with the NNW-SSE Kerna fault, and producing neurotoxic effects, including trance and delirium. New surveys including gas flux from …	Ist Nazl Geofis & Vulcanol, Sect Roma 2, I-00143 Rome, Italy; Univ Patras, Dept Geol, Patras 26500, Greece	Istituto Nazionale Geofisica e Vulcanologia (INGV); University of Patras	Etiope, G (corresponding author), Ist Nazl Geofis & Vulcanol, Sect Roma 2, Via V Murata 605, I-00143 Rome, Italy.		GERAGA, MARIA/AGJ-4293-2022; PAPATHEODOROU, GEORGE/GNP-5019-2022; Etiope, Giuseppe/H-3343-2011; Favali, Paolo/AAR-5166-2021	PAPATHEODOROU, GEORGE/0000-0003-3732-1900; Etiope, Giuseppe/0000-0001-8614-4221; Geraga, Maria/0000-0002-6861-2789; Christodoulou, Dimitris/0000-0002-3012-6865					17	20	20	0	19	GEOLOGICAL SOC AMER, INC	BOULDER	PO BOX 9140, BOULDER, CO 80301-9140 USA	0091-7613	1943-2682		GEOLOGY	Geology	OCT	2006	34	10
C	Gandin, A; Capezzuoli, E; Ciacci, A		Maggetti, M; Messiga, B		Gandin, A.; Capezzuoli, E.; Ciacci, A.			The stone of the inscribed Etruscan stelae from the Valdelsa area (Siena, Italy)	GEOMATERIALS IN CULTURAL HERITAGE	Geological Society Special Publication		English	Proceedings Paper	Symposium on Geomaterials in Cultural Heritage held at the 32nd International Geological Congress	AUG 20-28, 2004	Florence, ITALY				TRAVERTINE DEPOSITS; GEOLOGICAL RECORD; RAPOLANO TERME; CARBONATES; FACIES; TUFAS	The results of an archacometric study on five inscribed Etruscan funerary stelae, produced during the second half of the sixth century BC, in the Valdelsa area (NW of Siena, Italy), are reported. The style of the inscriptions suggests the presence of a local culture and a common language. The stone used to make the stelae is a laminated limestone consisting of the alternation of more or less comp…	[Gandin, A.; Capezzuoli, E.] Univ Siena, Dipartimento Sci Terra, I-53100 Siena, Italy; [Ciacci, A.] Univ Siena, Dipartimento Archeol & Storia Arti, I-53100 Siena, Italy	University of Siena; University of Siena	Gandin, A (corresponding author), Univ Siena, Dipartimento Sci Terra, I-53100 Siena, Italy.	gandin@unisi.it	Capezzuoli, Enrico/A-8915-2015	Capezzuoli, Enrico/0000-0002-4199-1870					37	1	1	0	1	GEOLOGICAL SOC PUBLISHING HOUSE	BATH	UNIT 7, BRASSMILL ENTERPRISE CTR, BRASSMILL LANE, BATH BA1 3JN, AVON, ENGLAND	0305-8719		1-86239-195-5	GEOL SOC SPEC PUBL	Geol. Soc. Spec. Publ.		2006	257
C	Parsons, R; Wentzel, J		Webb, B; Hirata, R; Kruse, E; Vrba, J		Parsons, Roger; Wentzel, Johan			Using sustainability indicators as a basis for classifying groundwater in South Africa	SUSTAINABILITY OF GROUNDWATER RESOURCES AND ITS INDICATORS	IAHS Publication		English	Proceedings Paper	Symposium on Groundwater Resources Sustainability Indicators	APR 06-07, 2005	Foz do Iguaco, BRAZIL	Int Assoc Hydrol Sci		classification; groundwater; indicators; sustainability		Under the South African Constitution, everybody has a right to an environment not harmful to their health and wellbeing; to have an environment protected for the benefit of present and future generations; and to have access to sufficient food and water. The main responsibility of the Department of Water Affairs and Forestry (DWAF) is to ensure sufficient water of an acceptable quality is availabl…	[Parsons, Roger] Parsons & Assoc Specialist Groundwater Consultant, POB 2606, ZA-7129 Somerset W, South Africa; [Wentzel, Johan] Dept Water Affairs & Forestry, ZA-0001 Pretoria, South Africa		Parsons, R (corresponding author), Parsons & Assoc Specialist Groundwater Consultant, POB 2606, ZA-7129 Somerset W, South Africa.	roger@pasgc.co.za							28	0	0	0	6	INT ASSOC HYDROLOGICAL SCIENCES	WALLINGFORD	INST OF HYDROLOGY, WALLINGFORD OX10 8BB, ENGLAND	0144-7815		978-1-901502-43-5	IAHS-AISH P			2006	302
C	Baba, A; Ayyildiz, O		Tellam, JH; Rivett, MO; Israfilov, RG; Herringshaw, LG		Baba, Alper; Ayyildiz, Onder			Urban groundwater pollution in Turkey - A national review of urban groundwater quality issues	URBAN GROUNDWATER MANAGEMENT AND SUSTAINABILITY	NATO Science Series IV-Earth and Environmental Sciences		English	Proceedings Paper	Conference of the NATO Advanced Study Institute on Management and Sustainable Development of Urban Groundwater Systems	AUG 06-15, 2004	Baku, AZERBAIJAN	NATO		Turkey; pollution; pesticides; septic tanks; industrial wastes; natural pollutant sources; geothermal waters	FLY-ASH; LEACHING CHARACTERISTICS; TRACE-ELEMENTS; YATAGAN MUGLA; DISPOSAL SITE; WATER-QUALITY; POWER-PLANT; CONTAMINATION; ISPARTA; SPRINGS	Groundwater pollution in Turkey is examined. Important natural sources of groundwater pollution identified include seawater intrusion, discharges from contaminated lakes and streams, geothermal waters, and dissolution of minerals. The major sources of anthropogenic groundwater contamination identified are: agricultural pesticides and fertilizers; mining waste products; industrial waste; on-site s…	[Baba, Alper; Ayyildiz, Onder] Canakkale Onsekiz Mart Univ, Engn & Architecture Fac, Geol Engn Dept, TR-17100 Canakkale, Turkey	Canakkale Onsekiz Mart University	Baba, A (corresponding author), Canakkale Onsekiz Mart Univ, Engn & Architecture Fac, Geol Engn Dept, TR-17100 Canakkale, Turkey.	alperbaba@comu.edu.tr	BABA, ALPER/AAG-6148-2020						56	10	10	0	6	SPRINGER	DORDRECHT	PO BOX 17, 3300 AA DORDRECHT, NETHERLANDS	1568-1238		1-4020-5173-5	NATO SCI S SS IV EAR	NATO Sci. Series IV Earth Environ. Sciences		2006	74
J	Di Gioia, ML; Leggio, A; Le Pera, A; Liquori, A; Perri, F				Di Gioia, M. L.; Leggio, A.; Le Pera, A.; Liquori, A.; Perri, F.			Occurrence of organic compounds in the thermal sulfurous waters of Calabria, Italy	CHROMATOGRAPHIA			English	Article						gas chromatography-mass spectrometry; solid-phase microextraction; polysulfide anions; thermal waters; diazomethane	SOLID-PHASE MICROEXTRACTION; CAMPI-FLEGREI CALDERA; FATTY-ACIDS; ORIGIN; LIPIDS; EVOLUTION; SPRINGS; NAPLES; FIELDS; CARBON	Sulfurous waters are certainly a substantial asset of the Calabria Region of Italy. They can be regarded as worth developing because of their human health implications and, if thermal tourism is promoted, their importance to the local economy. Because the effects of thermal waters on human health are not yet completely known and understood, it would be of interest to identify organic compounds re…	Univ Calabria, Dipartimento Sci Farmaceut, I-87036 Arcavacata Di Rende, CS, Italy	University of Calabria	Liquori, A (corresponding author), Univ Calabria, Dipartimento Sci Farmaceut, Via Ponte P Bucci,Cubo 15-C, I-87036 Arcavacata Di Rende, CS, Italy.	a.liguori@unical.it	Di Gioia, Maria Luisa/I-5830-2019; Le Pera, Adolfo/AAD-5527-2022	Di Gioia, Maria Luisa/0000-0001-5469-5459; Le Pera, Adolfo/0000-0003-3342-390X; Liguori, Angelo/0000-0003-4483-2506; Leggio, Antonella/0000-0002-4373-6232					32	9	9	0	6	VIEWEG	WIESBADEN	ABRAHAM-LINCOLN-STRABE 46, POSTFACH 15 47, D-65005 WIESBADEN, GERMANY	0009-5893			CHROMATOGRAPHIA	Chromatographia	JUN	2006	63	11-12
J	Boschetti, T; Venturelli, G; Toscani, L; Barbieri, M; Mucchino, C				Boschetti, T; Venturelli, G; Toscani, L; Barbieri, M; Mucchino, C			The Bagni di Lucca thermal waters (Tuscany, Italy):: an example of Ca-SO4 waters with high Na/Cl and low Ca/SO4 ratios	JOURNAL OF HYDROLOGY			English	Article						thermal waters; major and trace elements; oxygen; hydrogen; sulphur and strontium isotopes; Bagni di Lucca; Italy	NORTHERN APENNINES; ISOTOPIC COMPOSITION; GEOCHEMISTRY; EQUILIBRIA; EVENTS	The Bagm di Lucca thermal waters (Lucca province, Tuscany, Italy) have been well known since the Middle Age for their alleged curative properties. In the present work, the waters have been analysed for major and trace components and for 0, H, S and Sr isotopes. The 62 H and 8180 values indicate a meteoric origin of the waters and the tritium content suggests long-term (more than 40 years) circula…	Univ Parma, Dept Earth Sci, I-43100 Parma, Italy; Univ Roma La Sapienza, Dept Earth Sci, I-00185 Rome, Italy; Univ Parma, Dept Inorgan Chem Analyt Chem & Phys Chem, I-43100 Parma, Italy	University of Parma; Sapienza University Rome; University of Parma	Venturelli, G (corresponding author), Univ Parma, Dept Earth Sci, Parco Area Sci, I-43100 Parma, Italy.	gvt@unipr.it	Toscani, Lorenzo/G-6371-2012; Barbieri, Maurizio/E-9260-2012; Boschetti, Tiziano/F-8446-2011	Toscani, Lorenzo/0000-0001-5422-3507; Barbieri, Maurizio/0000-0002-6595-103X; Boschetti, Tiziano/0000-0002-5994-9750					73	60	60	2	10	ELSEVIER SCIENCE BV	AMSTERDAM	PO BOX 211, 1000 AE AMSTERDAM, NETHERLANDS	0022-1694	1879-2707		J HYDROL	J. Hydrol.	JUN 9	2005	307	1-4
J	Kucher, M				Kucher, M			The use of water and its regulation in medieval Siena	JOURNAL OF URBAN HISTORY			English	Article						water supply; fountains; Italy; infrastructure; laws		The Tuscan hill town of Siena, Italy, has been supplied by a system of gravity-fed fountains since at least the twelfth century. Medieval statutes and surviving physical evidence reveal that the city maintained the purity of its urban water supply by a combination of physical and legal structures. The urban water supply embodied the provisions of that legislation in the physical arrangements of t…	Univ Washington, Tacoma, WA USA	University of Washington; University of Washington Tacoma	Kucher, M (corresponding author), Univ Washington, Tacoma, WA USA.								57	14	19	0	7	SAGE PUBLICATIONS INC	THOUSAND OAKS	2455 TELLER RD, THOUSAND OAKS, CA 91320 USA	0096-1442			J URBAN HIST	J. Urban Hist.	MAY	2005	31	4
C	Petalas, C; Pisinaras, V; Koltsida, K; Tsihrintzis, VA		Lekkas, TD		Petalas, C.; Pisinaras, V.; Koltsida, K.; Tsihrintzis, V. A.			The hydrological regime of the East Basin of Thessaly, Greece	Proceedings of the 9th International Conference on Environmental Science and Technology, Vol A - Oral Presentations, Pts A and B	Proceedings of the International Conference on Environmental Science and Technology		English	Proceedings Paper	9th International Conference on Environmental Science and Technology	SEP 01-03, 2005	Rhodes Isl, GREECE	Global Network Environm Sci & Technol,Univ Aegean, Dept Environm Studies		water resources management; overexploitation of groundwater; water pollution; legislative framework		A typical example of an area with a serious water shortage due to poor water resources management and increased demand for water is the East Basin of Thessaly. This basin constitutes part of the Pinios River basin and covers approximately 3860 km(2). The current situation relative to water resources in the East basin is thoroughly analyzed and evaluated. The average annual rainfall is approximate…	Democritus Univ Thrace, Dept Envrionm Engn, Lab Ecol Engn & Technol, Xanthi 67100, Greece	Democritus University of Thrace	Petalas, C (corresponding author), Democritus Univ Thrace, Dept Envrionm Engn, Lab Ecol Engn & Technol, Xanthi 67100, Greece.		Pisinaras, Vassilios/AAE-8690-2019; Pisinaras, Vassilios/JGC-7767-2023; Tsihrintzis, Vassilios/AAL-5125-2021						11	0	0	0	1	UNIV AEGEAN	ATHENS	VOULGAROKTONOU 30, ATHENS 114 72, GREECE	1106-5516		960-7475-33-X	PROC INT CONF ENV SC			2005
J	Del Sol, G				Del Sol, G			Puritama Thermal Spring in the Atacama Desert, Chile (German Del Sol architect)	ARQ			Spanish	Article						Architecture-Chile; Landscaping-Chile; Arid zones; Spas; Thermal springs; Puritama; Atacama Desert		A rare source of water in the Chilean desert, this thermal spring has not been harnessed as a productive resource for agriculture. Instead, it has been used since ancient times for recreation. This intervention attempts to maintain the soft and primitive condition of the exceptionally humid soil as a place of rest and leisure for locals as well as visitors.											1	0	0	0	3	PONTIFICIA UNIV CATOLICA CHILE, ESCUELA ARQUITECTURA	SANTIAGO	EL COMENDADOR 1916, SANTIAGO 00000, CHILE	0717-6996			ARQ	ARQ	JUL	2004		57
J	Giannoulis, N; Maipa, V; Albanis, T; Konstantinou, I; Dimoliatis, I				Giannoulis, N; Maipa, V; Albanis, T; Konstantinou, I; Dimoliatis, I			The quality of drinking water supplies in North-Western Greece: A three-year follow-up	INTERNATIONAL JOURNAL OF ENVIRONMENTAL ANALYTICAL CHEMISTRY			English	Article; Proceedings Paper	2nd European Conference on Pesticides and Related Organic Micropollutants in the Environment	SEP 26-29, 2002	KERKYRA, GREECE			drinking water; groundwater; contamination; coliforms; streptococci; Greece	MICROBIOLOGICAL QUALITY; GROWTH; CONTAMINATION; GROUNDWATER; WELLS; UK	The study was undertaken to assess the microbiological and physicochemical quality of potable water of Arta, Preveza and Lefkada prefectures in North-Western Greece, during a 36-month survey (1996-1999). Drinking-water samples were collected from twelve points along the distribution networks located at the three cities of Arta, Preveza and Lefkada. The drinking-water quality standards were analyz…	Univ Ioannina, Sch Med, Dept Hyg & Epidemiol, GR-45110 Ioannina, Greece; Univ Ioannina, Dept Chem, Lab Environm Technol, GR-45110 Ioannina, Greece	University of Ioannina; University of Ioannina	Dimoliatis, I (corresponding author), Univ Ioannina, Sch Med, Dept Hyg & Epidemiol, GR-45110 Ioannina, Greece.	idimolia@cc.uoi.gr	Konstantinou, Ioannis/AAN-6223-2021	KONSTANTINOU, IOANNIS/0000-0003-0352-4988					27	4	4	0	1	TAYLOR & FRANCIS LTD	ABINGDON	2-4 PARK SQUARE, MILTON PARK, ABINGDON OR14 4RN, OXON, ENGLAND	0306-7319	1029-0397		INT J ENVIRON AN CH	Int. J. Environ. Anal. Chem.	JAN-MAR	2004	84	1-3
J	Swart, CJU; James, AR; Kleywegt, RJ; Stoch, EJ				Swart, CJU; James, AR; Kleywegt, RJ; Stoch, EJ			The future of the dolomitic springs after mine closure on the Far West Rand, Gauteng, RSA	ENVIRONMENTAL GEOLOGY			English	Article						dewatering; dolomite; mining; rewatering; Republic of South Africa		Approximately 1.2 km of dolomitic limestone overlies the Far West Rand gold reefs southwest of Johannesburg, South Africa. This karst aquifer is partitioned into several groundwater compartments by predominantly north-south trending syenite dykes. Prior to mining, the primary water flow was westwards, decanting over dyke boundaries as a succession of springs along the Lower Wonderfontein Spruit. …	GFL Min Serv Ltd, Ground Stabil Grp, ZA-2501 Oberholzer, South Africa; Metago Environm Engineers Pty Ltd, ZA-2060 Cramerview, South Africa; Council Geosci, ZA-0001 Pretoria, South Africa		Swart, CJU (corresponding author), GFL Min Serv Ltd, Ground Stabil Grp, POB 6171, ZA-2501 Oberholzer, South Africa.								24	22	25	1	7	SPRINGER-VERLAG	NEW YORK	175 FIFTH AVE, NEW YORK, NY 10010 USA	0943-0105			ENVIRON GEOL	Environ. Geol.	OCT	2003	44	7
C	Petersen, P; Mavroudis, A; Chang, CC		Brebbia, CA		Petersen, P; Mavroudis, A; Chang, CC			Implementation of regulatory directives for a water supply reservoir - a case history of Crystal Springs Dam in San Francisco Peninsula, California, USA	RIVER BASIN MANAGEMENT II	INTERNATIONAL SERIES ON PROGRESS IN WATER RESOURCES		English	Proceedings Paper	2nd International Conference on River Basin Management	2003	LAS PALMAS GC, SPAIN	Wessex Inst Technol				This paper provides a historical summary of the Crystal Springs Reservoir's purpose, design and development, physical changes and modifications, operational changes, and regulatory issues that have collectively contributed to the reservoir's current challenges. It touches upon the current operation of the reservoir and its hydraulic interrelationship with the surrounding water bodies. This paper …	Jacobs Civil Inc, San Francisco, CA USA		Petersen, P (corresponding author), Jacobs Civil Inc, San Francisco, CA USA.								0	0	0	0	1	WIT PRESS	SOUTHAMPTON	ASHURST LODGE, SOUTHAMPTON SO40 7AA, ASHURST, ENGLAND	1461-6513		1-85312-966-6	INT SER PROG WAT RES			2003	7
J	Dilsiz, C				Dilsiz, C			Environmental issues concerning natural resources at Pamukkale protected site, southwest Turkey	ENVIRONMENTAL GEOLOGY			English	Article						Pamukkale; SW Turkey		Pamukkale protected site is located 20 km away from the provincial center of Denizli in southwest Turkey. This site has unique natural and cultural assets such as hot water springs, white travertine terraces, and cultural ruins of the ancient city of Hierapolis. The rising interest in this site leads to irreversible deterioration of natural and cultural assets. This study reveals the environmenta…	Vrije Univ Amsterdam, Fac Earth Sci, NL-1081 HV Amsterdam, Netherlands	Vrije Universiteit Amsterdam	Dilsiz, C (corresponding author), Vrije Univ Amsterdam, Fac Earth Sci, De Boelelaan 1105, NL-1081 HV Amsterdam, Netherlands.								17	7	8	1	6	SPRINGER-VERLAG	NEW YORK	175 FIFTH AVE, NEW YORK, NY 10010 USA	0943-0105			ENVIRON GEOL	Environ. Geol.	MAR	2002	41	7
J	Ortloff, CR; Crouch, DP				Ortloff, CR; Crouch, DP			The urban water supply and distribution system of the Ionian city of Ephesos in the Roman Imperial Period	JOURNAL OF ARCHAEOLOGICAL SCIENCE			English	Article						Ephesos; water system; aqueducts; castellum		Within the ancient Ionian city of Ephesos on the western coast of modern Turkey, monumental buildings and remnants of the urban water supply system survive from archaic, Hellenistic, Roman and Byzantine times. At least four major aqueducts supplied the city and an elaborate system of terracotta piping, supplemented by stone and lead pipes, distributed water to the many public and private building…	CTC United Defense, Numerical Simulation Dep, Santa Clara, CA 95050 USA		Ortloff, CR (corresponding author), CTC United Defense, Numerical Simulation Dep, Santa Clara, CA 95050 USA.								23	29	29	0	19	ACADEMIC PRESS LTD	LONDON	24-28 OVAL RD, LONDON NW1 7DX, ENGLAND	0305-4403			J ARCHAEOL SCI	J. Archaeol. Sci.	AUG	2001	28	8
J	Simsek, S; Günay, G; Elhatip, H; Ekmekçi, M				Simsek, S; Günay, G; Elhatip, H; Ekmekçi, M			Environmental protection of geothermal waters and travertines at Pamukkale, Turkey	GEOTHERMICS			English	Article						hot springs; travertine; pollution; tourism; environmental protection; Pamukkale; Turkey		Tourism, and associated commercial activities have led to physical damage and discolouration of the famous white travertine terraces at Pamukkale, a World Heritage Site. To mitigate these environmental impacts, scientific studies were started in 1993 by UKAM and the Ministry of Culture. These show that an aquifer within Paleozoic marbles and Mesozoic limestones, with a capacity of delivering 510 …	Hacettepe Univ, Int Res & Applicat Ctr Karst Water Resources, TR-06532 Ankara, Turkey	Hacettepe University	Simsek, S (corresponding author), Hacettepe Univ, Int Res & Applicat Ctr Karst Water Resources, TR-06532 Ankara, Turkey.		EKMEKCI, Mehmet/ABC-9363-2020						11	52	56	2	27	PERGAMON-ELSEVIER SCIENCE LTD	OXFORD	THE BOULEVARD, LANGFORD LANE, KIDLINGTON, OXFORD OX5 1GB, ENGLAND	0375-6505			GEOTHERMICS	Geothermics	AUG-OCT	2000	29	4-5
J	Cuchí-Oterino, JA; Rodríguez-Caro, JB; de la Noceda-Márquez, CG				Cuchí-Oterino, JA; Rodríguez-Caro, JB; de la Noceda-Márquez, CG			Overview of hydrogeothermics in Spain	ENVIRONMENTAL GEOLOGY			English	Article						mineral waters; thermal waters; Spain		Hydrothermic features in Spain have been used since ancient times for therapeutic purposes. At present, the number of spas has decreased notably, although some of them have been restored for aesthetic reasons. From 1970 onwards hydrogeothermic energy started to be used. There are some boreholes and small facilities at several places in Spain, mostly on the Mediterranean coast and near Madrid. The…	Politecn Huesca, E-22071 Huesca, Spain; Inst Technol Geominero Espana, E-22003 Madrid, Spain		Politecn Huesca, Carretera Cuarte S-N, E-22071 Huesca, Spain.		Garcia-Noceda, Celestino/ABG-6082-2020	Garcia-Noceda, Celestino/0000-0003-2442-8493					18	3	3	0	0	SPRINGER	NEW YORK	233 SPRING ST, NEW YORK, NY 10013 USA	0943-0105			ENVIRON GEOL	Environ. Geol.	MAR	2000	39	5
C	Liyaqati, MB		Aminipouri, B; Ghoddousi, J		Liyaqati, MB			A glimpse at the history of conduits	PROCEEDINGS OF THE 8TH INTERNATIONAL CONFERENCE ON RAINWATER CATCHMENT SYSTEMS, VOL 3: RAINWATER CATCHMENT FOR SURVIVAL: RELIGIOUS AND CULTURAL ASPECTS			English	Proceedings Paper	8th International Conference on Rainwater Catchment Systems	APR 25-29, 1997	TEHRAN, IRAN	Minist Jihad E Sazandegi,Int Rainwater Catchment Syst Assoc				The term 'Kahriz' or 'Kohriz' is the water flowing from the higher elevation of a mountain in the form of seepage spring. Over 3,000 years ago, Iranians found out that a special layer of the earth existed at the foot of the mountains, especially tail ones, where water would accumulate under the subterranean area due to the impregnable nature of the layers located on top of the trapped water which…	Off Representat Supreme Jurisprudent, Dept Farhang E Jihad Quarterly, Qom 186, Iran										0	0	0	0	0	SOIL CONSERVATION & WATERSHED MANAGEMENT RESEARCH CENTER	TEHRAN	POB 13445-1136, TEHRAN, IRAN							1997
C	Ekmekci, M; Degirmenci, M; Erduran, B; Sevuk, OF		Gunay, G; Johnson, AI		Ekmekci, M; Degirmenci, M; Erduran, B; Sevuk, OF			Groundwater pollution in Iskenderun karst basin, SE Turkey	KARST WATERS & ENVIRONMENTAL IMPACTS			English	Proceedings Paper	5th International Symposium and Field Seminar on Karst Waters and Environmental Impacts	SEP 10-20, 1995	ANTALYA, TURKEY	Hacettepe Univ,Int Res & Appl Ctr Karst Water Resources,Hacettepe Univ, Fac Engn Hydrogeol Eng Program,Int Assoc Hydrogeologists,Int Assoc Hydrol Sci,Int Atom Energy Agcy,Med Campus Project 355,Sci & Tech Res Council Turkey,Turkish Promot Fund,UNESCO, Div Water Sci,UNESCO, IGCP Project 379,UN Dev Program,UN Envirornm Program,UN Nat Resources & Environm Planning & Management Branch,US Natl Comm Sc…				Iskenderun city, situated in the East-Mediterranean region of Turkey, suffers from shortage of water as a consequence of rapid economic development and population increase. The two main water bearing lithologic formations in oskenderun province are the coastal alluvium and the extensively karstified carbonate rocks. Abuse of the karstic depressions and solution cavities as waste disposal sites th…			Ekmekci, M (corresponding author), HACETTEPE UNIV,INT RES CTR KARST WATER RESOURCES,ANKARA,TURKEY.		EKMEKCI, Mehmet/ABC-9363-2020						0	1	1	0	2	A A BALKEMA	ROTTERDAM	PO BOX 1675, 3000 BR ROTTERDAM, NETHERLANDS			90-5410-858-4				1997
J	Ekmekci, M; Gunay, G				Ekmekci, M; Gunay, G			Role of public awareness in groundwater protection	ENVIRONMENTAL GEOLOGY			English	Article; Proceedings Paper	International Symposium and Field Seminar on Karst Waters and Environmental Impacts	SEP 10-20, 1996	ANTALYA, TURKEY			groundwater pollution; protection zones; public awareness; administration; law and regulations; turkey		Scarcity of water, particularly in towns situated along the Mediterranean coast where the main aquifers are in karstic carbonate rocks, necessitates more thoroughness in exploiting and protecting the groundwater resources. Geomorphological and hydrogeological studies have revealed large quantities of the input and throughput features, such as sinkholes, dolines, uvalas and poljes in the recharge …			Ekmekci, M (corresponding author), UNIV HACETTEPE,INT RES & APPLICAT CTR KARST WATER RESOURCES,TR-06532 ANKARA,TURKEY.		EKMEKCI, Mehmet/ABC-9363-2020						2	12	13	0	15	SPRINGER VERLAG	NEW YORK	175 FIFTH AVE, NEW YORK, NY 10010	0177-5146			ENVIRON GEOL	Environ. Geol.	MAR	1997	30	1-2
J	Crouch, DP				Crouch, DP			Environmental geology of ancient Greek cities	ENVIRONMENTAL GEOLOGY			English	Article						Greco-Roman cities; urban location; karst geology; colonization		Man-environment relations in the ancient Greek world, as now, were complex interactions. To understand them, we need to study a range of physical features and man's impact on the setting. The underlying geological reality of this area is karst, which is widely distributed, dominating Greece, the southern half of Turkey, and southern Italy and Sicily, where the Greco-Roman cities that we study wer…			Crouch, DP (corresponding author), RENSSELAER POLYTECH INST,SCH ARCHITECTURE,739 YALE ST 6B,SANTA PAULA,CA 93060, USA.								61	10	10	0	11	SPRINGER VERLAG	NEW YORK	175 FIFTH AVE, NEW YORK, NY 10010	0177-5146			ENVIRON GEOL	Environ. Geol.	APR	1996	27	3
J	Bono, P; Boni, C				Bono, P; Boni, C			Mineral waters in Italy	ENVIRONMENTAL GEOLOGY			English	Article						mineral waters; spas; water resources; Italy		The use of spring water as a drinking, therapeutic, and ornamental resource has historical origins that date back to the Romans. The most ancient regulations on ''mineral waters'' had been enacted in Italy long before the union (1870).			Bono, P (corresponding author), UNIV ROMA LA SAPIENZA,CNR,DIPARTIMENTO SCI TERRA,PIAZZALE ALDO MORO 5,I-00185 ROME,ITALY.								0	2	2	0	2	SPRINGER VERLAG	NEW YORK	175 FIFTH AVE, NEW YORK, NY 10010	0177-5146			ENVIRON GEOL	Environ. Geol.	MAR	1996	27	2
J	Green, S; King, G				Green, S; King, G			The importance of goats to a natural environment: A case study from Epirus (Greece) and Southern Albania	TERRA NOVA			English	Article								In the Epirus region of North-west Greece, spring flows in villages have reduced dramatically over the last few decades, in some cases with serious economic consequences. We argue here that this has resulted from the major reduction of grazing by mountain goats over the same period together with other associated land-use changes. Normally such a contention would be impossible to demonstrate becau…	INST PHYS GLOBE, F-75252 PARIS 05, FRANCE	UDICE-French Research Universities; Universite Paris Cite	Green, S (corresponding author), UNIV MANCHESTER, DEPT SOCIAL ANTHROPOL, ROSCOE BLDG, MANCHESTER M13 9PL, LANCS, ENGLAND.								14	6	6	0	6	WILEY	HOBOKEN	111 RIVER ST, HOBOKEN 07030-5774, NJ USA	0954-4879	1365-3121		TERRA NOVA	Terr. Nova		1996	8	6
J	FRIDLEIFSSON, IB; FREESTON, DH				FRIDLEIFSSON, IB; FREESTON, DH			GEOTHERMAL-ENERGY RESEARCH-AND-DEVELOPMENT	GEOTHERMICS			English	Article						GEOTHERMAL RESOURCES; GEOTHERMAL UTILIZATION; GEOTHERMAL DEVELOPMENT; GEOTHERMAL INVESTMENTS		Thermal springs have been used for bathing, washing and cooking for thousands of years in many countries. At the beginning of this century, experiments started with piping the hot water to houses for space heating and with using geothermal steam for the production of electricity. Geothermal is a proven energy resource that uses mostly conventional technology. Commercial production on the scale of…	UNIV AUCKLAND,INST GEOTHERMAL,AUCKLAND,NEW ZEALAND; LAWRENCE BERKELEY LAB,IGA SECRETARIAT,BOARD DIRECTORS ASSOC,BERKELEY,CA 94720	University of Auckland; United States Department of Energy (DOE); Lawrence Berkeley National Laboratory	FRIDLEIFSSON, IB (corresponding author), UN UNIV,GEOTHERMAL TRAINING PROGRAME,ORKUSTOFNUN GRENSASVEGUR 9,IS-108 REYKJAVIK,ICELAND.								80	23	26	8	79	PERGAMON-ELSEVIER SCIENCE LTD	OXFORD	THE BOULEVARD, LANGFORD LANE, KIDLINGTON, OXFORD, ENGLAND OX5 1GB	0375-6505			GEOTHERMICS	Geothermics	APR	1994	23	2
[truncated: 22 more columns]

## Sheet: Global
Publication Type	Authors	Book Authors	Book Editors	Book Group Authors	Author Full Names	Book Author Full Names	Group Authors	Article Title	Source Title	Book Series Title	Book Series Subtitle	Language	Document Type	Conference Title	Conference Date	Conference Location	Conference Sponsor	Conference Host	Author Keywords	Keywords Plus	Abstract	Addresses	Affiliations	Reprint Addresses	Email Addresses	Researcher Ids	ORCIDs	Funding Orgs	Funding Name Preferred	Funding Text	Cited References	Cited Reference Count	Times Cited, WoS Core	Times Cited, All Databases	180 Day Usage Count	Since 2013 Usage Count	Publisher	Publisher City	Publisher Address	ISSN	eISSN	ISBN	Journal Abbreviation	Journal ISO Abbreviation	Publication Date	Publication Year	Volume	Issue	Part Number
J	Munteanu, C; Munteanu, D; Hoteteu, M; Dogaru, G				Munteanu, Constantin; Munteanu, Diana; Hoteteu, Mihail; Dogaru, Gabriela			Balneotherapy - medical, scientific, educational and economic relevance reflected by more than 250 articles published in Balneo Research Journal	BALNEO RESEARCH JOURNAL			English	Article						Balneology; Balneotherapy; Balneo Research Journal; Natural therapeutic factors; Balneary Resort	NATURAL THERAPEUTIC FACTORS; ARTIFICIAL AIR IONIZATION; UPPER-LIMB REHABILITATION; CARBONATED MINERAL-WATER; CANCER-RELATED FATIGUE; PULSED SHORT WAVES; QUALITY-OF-LIFE; BAILE TUSNAD; ISCHEMIC-STROKE; SPRING 3	Introduction. Balneology has a long European and Asian tradition and Romania can be the cornerstone of international bridges in this area due to its geographical position, legendary tradition and extraordinary natural resources of all kind. The use of thermal and mineral springs on the territory of the country for health and treatment purposes is a tradition with a history of more than two thousa…	[Munteanu, Constantin; Munteanu, Diana; Hoteteu, Mihail; Dogaru, Gabriela] Romanian Assoc Balneol, Bucharest, Romania; [Munteanu, Constantin] Emergency Clin Hosp Bagdasar Arseni, Bucharest, Romania; [Munteanu, Diana] Natl Inst Rehabil Phys Med & Balneoclimatol, Bucharest, Romania; [Hoteteu, Mihail] Biosafety LTD, Bucharest, Romania; [Dogaru, Gabriela] Iuliu Hatieaganu Med & Pharm Univ, Cluj Napoc…		Munteanu, C (corresponding author), Romanian Assoc Balneol, Bucharest, Romania.;Munteanu, C (corresponding author), Emergency Clin Hosp Bagdasar Arseni, Bucharest, Romania.	office@bioclima.ro	Munteanu, Constantin/ACM-9541-2022; Constantin, Munteanu/GYV-5952-2022	Munteanu, Constantin/0000-0002-1084-7710;					249	16	17	1	17	ROMANIAN ASSOC BALNEOLOGY	BUCHAREST	BUCHAREST, SECTOR 2, ALEEA DOBRINA NO 7, BL D10, SC A, AP 4, BUCHAREST, 00000, ROMANIA	2069-7597	2069-7619		BALNEO RES J	Balneo Res. J.	SEP	2019	10	3
S	Erfurt-Cooper, P		Fearnley, CJ; Bird, DK; Haynes, K; McGuire, WJ; Jolly, G		Erfurt-Cooper, Patricia			Active Hydrothermal Features as Tourist Attractions	OBSERVING THE VOLCANO WORLD: VOLCANO CRISIS COMMUNICATION	Advances in Volcanology		English	Article; Book Chapter						Hydrothermal activity; Protected site status; Risk management; Sustainable tourism; Volcanic environments	COMMUNICATION; HAZARDS; VOLCANO; RISK	Tourists are looking increasingly for adventurous experiences by exploring unusual and interesting landscapes. Active volcanic and hydrothermal landscapes and their remarkable manifestations of geysers, fumaroles and boiling mud ponds are some of the surface features that fascinate visitors of National Parks, Geoparks and World Heritage areas worldwide. The uniqueness of hydrothermal activity bas…	[Erfurt-Cooper, Patricia] GEOTOURISM Australia, Canberra, ACT, Australia		Erfurt-Cooper, P (corresponding author), GEOTOURISM Australia, Canberra, ACT, Australia.	Patricia.Erfurt@my.jcu.edu.au							51	4	4	0	5	SPRINGER-VERLAG BERLIN	BERLIN	HEIDELBERGER PLATZ 3, D-14197 BERLIN, GERMANY	2364-3277	2364-3285	978-3-319-44097-2; 978-3-319-44095-8	ADV VOLCANOL			2018
J	Fioravanti, A; Karagülle, M; Bender, T; Karagülle, MZ				Fioravanti, Antonella; Karagulle, Mine; Bender, Tamas; Karagulle, Mufit Zeki			Balneotherapy in osteoarthritis: Facts, fiction and gaps in knowledge	EUROPEAN JOURNAL OF INTEGRATIVE MEDICINE			English	Article						Balneotherapy; Cost-effectiveness; Knowledge; Mechanisms of action; Osteoarthritis; Randomized controlled trials	MUD-PACK THERAPY; BILATERAL KNEE OSTEOARTHRITIS; SULFUROUS THERMAL WATER; BATH THERAPY; FOLLOW-UP; MARKERS	Balneotherapy (BT) is widely used in daily clinical practice for the management of osteoarthritis (OA) in many European countries, as well as in Turkey, Israel and Japan (OA). However, despite its long history and tradition, the scientific value of BT is still the subject of discussion. The aim of this overview was to discuss the current evidence and critical points about the mechanisms of action…	[Fioravanti, Antonella] Azienda Osped Univ Senese, Le Scotte Policlin, Rheumatol Unit, Viale Bracci 1, I-53100 Siena, Italy; [Karagulle, Mine; Karagulle, Mufit Zeki] Istanbul Univ, Istanbul Fac Med, Dept Med Ecol & Hydroclimatol, Istanbul, Turkey; [Bender, Tamas] Polyclin Hosp Bros St John God, Budapest, Hungary	University of Siena; University Hospital of Siena; Istanbul University	Fioravanti, A (corresponding author), Azienda Osped Univ Senese, Le Scotte Policlin, Rheumatol Unit, Viale Bracci 1, I-53100 Siena, Italy.	fioravanti7@virgilio.it	Karagülle, Müfit Zeki/AAD-6090-2020; Karagülle, Mine/J-4418-2016	Karagülle, Mine/0000-0002-8060-970X					22	66	66	0	25	ELSEVIER SCIENCE INC	NEW YORK	360 PARK AVE SOUTH, NEW YORK, NY 10010-1710 USA	1876-3820	1876-3839		EUR J INTEGR MED	Eur. J. Integr. Med.	JAN	2017	9
J	Cantonati, M; Segadelli, S; Ogata, K; Tran, H; Sanders, D; Gerecke, R; Rott, E; Filippini, M; Gargini, A; Celico, F				Cantonati, Marco; Segadelli, Stefano; Ogata, Kei; Tran, Ha; Sanders, Diethard; Gerecke, Reinhard; Rott, Eugen; Filippini, Maria; Gargini, Alessandro; Celico, Fulvio			A global review on ambient Limestone-Precipitating Springs (LPS): Hydrogeological setting, ecology, and conservation	SCIENCE OF THE TOTAL ENVIRONMENT			English	Review						Limestone-Precipitating Springs (LPS); Spring habitats; Biocalcification; EU Habitat Directive; Tufa Springs; Spring-Associated Limestones (SAL); Freshwater conservation; Travertines	GROUNDWATER-FLOW SYSTEMS; TRAVERTINE DEPOSITS; MICROBIAL CARBONATES; NORTHERN APENNINES; COLORADO PLATEAU; WATER CHEMISTRY; TUFA DEPOSITS; CALCITE; REGION; BASIN	Springs are biodiversity hotspots and unique habitats that are threatened, especially by water overdraft. Here we review knowledge on ambient-temperature (non-geothermal) freshwater springs that achieve sufficient oversaturation for CaCO3 - by physical CO2 degassing and activity of photoautotrophs- to deposit limestone, locally resulting in scenic carbonate structures: Limestone-Precipitating Spr…	[Cantonati, Marco] Museo Sci MUSE, Limnol & Phycol Sect, Corso Lavoro & Sci 3, I-38123 Trento, Italy; [Segadelli, Stefano] Emilia Romagna Reg, Geol Seism & Soil Survey, Bologna, Italy; [Tran, Ha; Sanders, Diethard] Univ Innsbruck, Fac Geo & Atmospher Sci, Inst Geol, Innrain 52f, A-6020 Innsbruck, Austria; [Segadelli, Stefano; Ogata, Kei; Celico, Fulvio] Univ Parma, Dept Phys & Earth Sci, Parma, I…	University of Innsbruck; University of Parma; Eberhard Karls University of Tubingen; University of Innsbruck; University of Bologna	Cantonati, M (corresponding author), Museo Sci MUSE, Limnol & Phycol Sect, Corso Lavoro & Sci 3, I-38123 Trento, Italy.	marco.cantonati@muse.it	Filippini, Maria/AAJ-5779-2021; Cantonati, Marco/G-4278-2018; Ogata, Kei/P-3125-2016; Rott, Eugen EGR/J-4768-2012; Filippini, Maria/AAW-1358-2020	Filippini, Maria/0000-0001-5050-5072; Cantonati, Marco/0000-0003-0179-3842; Ogata, Kei/0000-0002-4978-2854; Filippini, Maria/0000-0001-5050-5072; segadelli, stefano/0000-0001-5260-6256; Tran, Ha/0000-0003-3811-2457; Gargini, Alessandro/0000-0002-9271-219X	EBERs Project - Geological Survey of the Emilia-Romagna Region [PG.2011.0147111]; Project 911 of the OeAD Vietnam-Austria PhD Scholarship Programme	EBERs Project - Geological Survey of the Emilia-Romagna Region; Project 911 of the OeAD Vietnam-Austria PhD Scholarship Programme	This paper is part of the STOTEN virtual special issue, titled 'The relevance and potential of benthic algae for present-day freshwater ecological assessments'. This work was partially supported by the EBERs Project (Exploring the Biodiversity of Emilia-Romagna springs; Emilia-Romagna Region official record N. PG.2011.0147111, June 15th 2011) funded by the Geological Survey of the Emilia-Romagna …		145	51	54	7	88	ELSEVIER SCIENCE BV	AMSTERDAM	PO BOX 211, 1000 AE AMSTERDAM, NETHERLANDS	0048-9697	1879-1026		SCI TOTAL ENVIRON	Sci. Total Environ.	OCT 15	2016	568
J	Juuti, PS; Antoniou, GP; Dragoni, W; El-Gohary, F; De Feo, G; Katko, TS; Rajala, RP; Zheng, XY; Drusiani, R; Angelakis, AN				Juuti, Petri S.; Antoniou, Georgios P.; Dragoni, Walter; El-Gohary, Fatma; De Feo, Giovanni; Katko, Tapio S.; Rajala, Riikka P.; Zheng, Xiao Yun; Drusiani, Renato; Angelakis, Andreas N.			Short Global History of Fountains	WATER			English	Article						Chinese civilizations; Egyptians; Etruscans; Minoans; Hellenes; Medieval times; Ottomans; Romans; water distribution; water supply systems	URBAN WATER; SYSTEMS	Water fountains are part of every human settlement, and historical and mythological stories. They are the source from which life-sustaining water was distributed to people until piped systems started providing fresh tap water inside buildings. In many places, people visit fountains to experience the freshness of running water, to prepare for prayers, or to make a wish. Fountains have also provide…	[Juuti, Petri S.; Rajala, Riikka P.] Univ Tampere, Int Environm Hist Grp, FI-33014 Tampere, Finland; [Antoniou, Georgios P.] NTUA, Dept Architecture Engn, PhDc, Athens 10682, Greece; [Dragoni, Walter] Univ Perugia, Dept Phys & Geol, I-06123 Perugia, Italy; [El-Gohary, Fatma] Natl Res Ctr, Water Pollut Res Dept, Cairo 12622, Egypt; [De Feo, Giovanni] Univ Salerno, Dept Ind Engn, I-84084 Fisciano, …	Tampere University; National Technical University of Athens; University of Perugia; Egyptian Knowledge Bank (EKB); National Research Centre (NRC); University of Salerno; Tampere University; Tampere University	Juuti, PS (corresponding author), Univ Tampere, Int Environm Hist Grp, FI-33014 Tampere, Finland.	petri.juuti@uta.fi; antonioug@tee.gr; walter.dragoni@unipg.it; fgohary@hotmail.com; g.defeo@unisa.it; tapio.katko@tut.fi; riikka.rajala@uta.fi; zhengxy68@163.com; renato.drusiani@federutility.it; info@a-angelakis.gr	Dragoni, Walter/AAG-2564-2019; De Feo, Giovanni/J-7435-2012	Dragoni, Walter/0000-0001-6291-5765; De Feo, Giovanni/0000-0002-0696-0569; Juuti, Riikka Pauliina/0000-0002-9106-248X; Katko, Tapio/0000-0001-9554-2766; Juuti, Petri Sakari/0000-0002-1387-7237; el-Gohary, fatma/0000-0002-5056-925X	Academy of Finland AKVA project Water as Social and Cultural Space [263417]; Provincia di Perugia; Fondazione Cassa di Risparmio di Perugia [2010.011.0442]; Academy of Finland (AKA) [263417, 263417] Funding Source: Academy of Finland (AKA)	Academy of Finland AKVA project Water as Social and Cultural Space(Research Council of Finland); Provincia di Perugia; Fondazione Cassa di Risparmio di Perugia(Fondazione Cassa Risparmio Perugia); Academy of Finland (AKA)(Research Council of Finland)	We thank Academy of Finland AKVA project Water as Social and Cultural Space (No. 263417) for their support. The chapters on Etruria, Rome and the Middle Ages in Western Europe were supported by Provincia di Perugia and Fondazione Cassa di Risparmio di Perugia (project 2010.011.0442, coordinated by W. Dragoni).		57	7	7	0	11	MDPI	BASEL	ST ALBAN-ANLAGE 66, CH-4052 BASEL, SWITZERLAND	2073-4441			WATER-SUI	Water	MAY	2015	7	5
J	LaMoreaux, PE; LaMoreaux, J				LaMoreaux, Philip E.; LaMoreaux, Jim			Karst: the foundation for concepts in hydrogeology	ENVIRONMENTAL GEOLOGY			English	Article; Proceedings Paper	International Conference on Water Resource and Environmental Problems in Karst	SEP 14-19, 2005	Belgrade, SERBIA			karst spring waters; karst; hydrogeology		Few citizens of the world would have trouble understanding the terms springs, ground water, geology, or hydrology. Newer water terms that are more familiar include bottled water, spring water, sparkling water, or mineral water, all of which now come in vessels of different shapes, sizes, colors and labels. It is interesting to note that a glass of cold, refreshing tap water will cost about 1 cent…	Int Journal Environm Geol, Tuscaloosa, AL 35401 USA; PE LaMoreaux & Assoc, Tuscaloosa, AL 35401 USA		LaMoreaux, PE (corresponding author), Int Journal Environm Geol, 2610 Univ Blvd, Tuscaloosa, AL 35401 USA.	pel@dbtech.net; jlamoreaux@pela.com							0	12	12	2	30	SPRINGER	NEW YORK	233 SPRING ST, NEW YORK, NY 10013 USA	0943-0105			ENVIRON GEOL	Environ. Geol.	JAN	2007	51	5
J	FRIDLEIFSSON, IB; FREESTON, DH				FRIDLEIFSSON, IB; FREESTON, DH			GEOTHERMAL-ENERGY RESEARCH-AND-DEVELOPMENT	GEOTHERMICS			English	Article						GEOTHERMAL RESOURCES; GEOTHERMAL UTILIZATION; GEOTHERMAL DEVELOPMENT; GEOTHERMAL INVESTMENTS		Thermal springs have been used for bathing, washing and cooking for thousands of years in many countries. At the beginning of this century, experiments started with piping the hot water to houses for space heating and with using geothermal steam for the production of electricity. Geothermal is a proven energy resource that uses mostly conventional technology. Commercial production on the scale of…	UNIV AUCKLAND,INST GEOTHERMAL,AUCKLAND,NEW ZEALAND; LAWRENCE BERKELEY LAB,IGA SECRETARIAT,BOARD DIRECTORS ASSOC,BERKELEY,CA 94720	University of Auckland; United States Department of Energy (DOE); Lawrence Berkeley National Laboratory	FRIDLEIFSSON, IB (corresponding author), UN UNIV,GEOTHERMAL TRAINING PROGRAME,ORKUSTOFNUN GRENSASVEGUR 9,IS-108 REYKJAVIK,ICELAND.								80	23	26	8	79	PERGAMON-ELSEVIER SCIENCE LTD	OXFORD	THE BOULEVARD, LANGFORD LANE, KIDLINGTON, OXFORD, ENGLAND OX5 1GB	0375-6505			GEOTHERMICS	Geothermics	APR	1994	23	2
7
[truncated: 22 more columns]

## Sheet: Mediterranean Basin
Publication Type	Authors	Book Authors	Book Editors	Book Group Authors	Author Full Names	Book Author Full Names	Group Authors	Article Title	Source Title	Book Series Title	Book Series Subtitle	Language	Document Type	Conference Title	Conference Date	Conference Location	Conference Sponsor	Conference Host	Author Keywords	Keywords Plus	Abstract	Addresses	Affiliations	Reprint Addresses	Email Addresses	Researcher Ids	ORCIDs	Funding Orgs	Funding Name Preferred	Funding Text	Cited References	Cited Reference Count	Times Cited, WoS Core	Times Cited, All Databases	180 Day Usage Count	Since 2013 Usage Count	Publisher	Publisher City	Publisher Address	ISSN	eISSN	ISBN	Journal Abbreviation	Journal ISO Abbreviation	Publication Date	Publication Year	Volume	Issue	Part Number
J	Dunyach, I				Dunyach, Ingrid			SACRED SPACE AND RITUAL PRACTICES AROUND ROCHER- SOURCE The case of the source of the Fajouse at the top of the Pyrenees (late 6th-late 3rd century BC)	ETUDES CLASSIQUES			French	Article								Excavations carried out from 2013 to 2015 on the site of la Fajouse have brought to light cultural practices around a spring located in the mountains, on the border between France and Spain, above the plains of Emporion and Rhode (6th cent. BC - 6th cent. AD). After the description of the site environment, the findings in and near the spring basin are presented for the first two phases of occupat…	[Dunyach, Ingrid] Univ Perpignan Via Domitia, CRESEM EA 7397, Labex Archimede, Perpignan, France		Dunyach, I (corresponding author), Univ Perpignan Via Domitia, CRESEM EA 7397, Labex Archimede, Perpignan, France.	dunyach.ingrid@club-internet.fr							70	0	0	0	0	SOC ETUDES CLASSIQUES	NAMUR	61 RUE DE BRUXELLES, B-5000 NAMUR, BELGIUM	0014-200X			ETUD CLASSIQUES	Etud. Class.		2019	87	1-3
J	Stewart, IS; Piccardi, L				Stewart, Iain S.; Piccardi, Luigi			Seismic faults and sacred sanctuaries in Aegean antiquity	PROCEEDINGS OF THE GEOLOGISTS ASSOCIATION			English	Article						Earthquakes; Archaeology; Tectonics; Greece; Turkey	PERACHORA PENINSULA; ACTIVE TECTONICS; DELPHIC ORACLE; EARTHQUAKE ARCHAEOLOGY; DENIZLI BASIN; CORINTH RIFT; GREECE; GULF; HIERAPOLIS; NOTCHES	The ancient destructive capability of earthquake faults is well chronicled by historians and their cultural impact widely uncovered by archaeologists. Archaeological and geological investigations at some of the most renowned sites in the ancient Greece world, however, suggest a more nuanced and intimate relationship between seismic faults and past human settlements. In the Aegean's karstic landsc…	[Stewart, Iain S.] Univ Plymouth, Sch Geog Earth & Environm Sci, Plymouth PL4 8AA, Devon, England; [Piccardi, Luigi] Inst Geosci & Earth Resources, CNR, Via G La Pira 4, I-50121 Florence, Italy	University of Plymouth; Consiglio Nazionale delle Ricerche (CNR); Istituto di Geoscienze e Georisorse (IGG-CNR)	Stewart, IS (corresponding author), Univ Plymouth, Sch Geog Earth & Environm Sci, Plymouth PL4 8AA, Devon, England.;Piccardi, L (corresponding author), Inst Geosci & Earth Resources, CNR, Via G La Pira 4, I-50121 Florence, Italy.	istewart@plymouth.ac.uk; luigi.piccardi@cnr.it	Piccardi, Luigi/AAJ-9820-2020; Stewart, Iain/HTM-3943-2023	Piccardi, Luigi/0000-0001-6964-3205; Stewart, Iain/0000-0002-9746-8667					114	14	15	0	10	ELSEVIER SCI LTD	OXFORD	THE BOULEVARD, LANGFORD LANE, KIDLINGTON, OXFORD OX5 1GB, OXON, ENGLAND	0016-7878			P GEOLOGIST ASSOC	Proc. Geol. Assoc.	OCT	2017	128	5-6
J	De Feo, G; Angelakis, AN; Antoniou, GP; El-Gohary, F; Haut, B; Passchier, CW; Zheng, XY				De Feo, Giovanni; Angelakis, Andreas N.; Antoniou, Georgios P.; El-Gohary, Fatma; Haut, Benoit; Passchier, Cees W.; Zheng, Xiao Yun			Historical and Technical Notes on Aqueducts from Prehistoric to Medieval Times	WATER			English	Review						Aqua Claudia; Aqua Marcia; Aspendos; Byzantines; Eupalinos; Gier; Hellenes; Knossos; Nimes; Minoan; Pergamon; Romans; Segovia; Valens	COMPUTATIONAL FLUID-DYNAMICS; WATER MANAGEMENT; URBAN WATER; SYSTEM; MINOAN; CITY; LIFE	The aim of this paper is to present the evolution of aqueduct technologies through the millennia, from prehistoric to medieval times. These hydraulic works were used by several civilizations to collect water from springs and to transport it to settlements, sanctuaries and other targets. Several civilizations, in China and the Americas, developed water transport systems independently, and brought …	[De Feo, Giovanni] Univ Salerno, Dept Ind Engn, I-84084 Fisciano, SA, Italy; [Angelakis, Andreas N.] Natl Fdn Agr Res NAGREF, Inst Iraklion, Iraklion 71307, Greece; [Antoniou, Georgios P.] Inst Educ Technol, Athens 11474, Greece; [El-Gohary, Fatma] Natl Res Ctr, Water Pollut Res Dept, Cairo 11787, Egypt; [Haut, Benoit] Univ Libre Bruxelles, Chem Engn Unit, B-1050 Brussels, Belgium; [Passchier, Ce…	University of Salerno; University of West Attica; Egyptian Knowledge Bank (EKB); National Research Centre (NRC); Universite Libre de Bruxelles; Johannes Gutenberg University of Mainz	De Feo, G (corresponding author), Univ Salerno, Dept Ind Engn, Via Giovanni Paolo 2,132, I-84084 Fisciano, SA, Italy.	g.defeo@unisa.it; info@a-angelakis.gr; antonioug@tee.gr; fgohary@hotmail.com; bhaut@ulb.ac.be; cpasschi@uni-mainz.de; zhengxy68@163.com	De Feo, Giovanni/J-7435-2012	De Feo, Giovanni/0000-0002-0696-0569; el-Gohary, fatma/0000-0002-5056-925X; Haut, Benoit/0000-0002-3021-0207					84	35	35	1	45	MDPI	BASEL	ST ALBAN-ANLAGE 66, CH-4052 BASEL, SWITZERLAND	2073-4441			WATER-SUI	Water	DEC	2013	5	4
J	Stevanovic, Z; Eftimi, R				Stevanovic, Zoran; Eftimi, Romeo			Karstic sources of water supply for large consumers in southeastern Europe - sustainability, disputes and advantages	GEOLOGIA CROATICA			English	Article						karst; aquifer; water supply; groundwater control; SE Europe		Southeastern Europe is known worldwide as classic karst terrain. In the Alpine orogenic belt the karstified carbonate rocks are either dominant, as in the Dinarides, or widely distributed, as in the Carpathian-Balkans, Hellenides or Pindes. Concerning karstic groundwater resources, this region is by far the richest in all of Europe. Some areas, such as southern Montenegro, are characterized by an…	[Stevanovic, Zoran] Univ Belgrade, Dept Hydrogeol, Ctr Karst Hydrogeol, Fac Min & Geol, Belgrade, Serbia; [Eftimi, Romeo] ITA Consult, Tirana, Albania	University of Belgrade	Stevanovic, Z (corresponding author), Univ Belgrade, Dept Hydrogeol, Ctr Karst Hydrogeol, Fac Min & Geol, Djusina 7, Belgrade, Serbia.	zstev@eunet.rs; eftimi@sanx.net	Stevanovic, Zoran/AAR-2078-2020						26	10	10	0	11	CROATIAN GEOLOGICAL SURVEY	ZAGREB	SACHSOVA 2, POB 268, ZAGREB, HR-10000, CROATIA	1330-030X	1333-4875		GEOL CROAT	Geol. Croat.		2010	63	2
J	Mijatovic, B				Mijatovic, Borivoje			The groundwater discharge in the Mediterranean karst coastal zones and freshwater tapping: set problems and adopted solutions. Case studies	ENVIRONMENTAL GEOLOGY			English	Article; Proceedings Paper	International Conference on Water Resource and Environmental Problems in Karst	SEP 14-19, 2005	Belgrade, SERBIA			Mediterranean basin; coastal zone; submarine karst; Mediterranean		In the karstic regions of the Mediterranean coastal zones the groundwater discharge and its outcrops-the coastal and submarine springs-represent the most typical natural phenomena of littoral karst, the economic potential of which is significant. The case studies discussed in this paper concern the problems of freshwater tapping in karst coastal zones along the Mediterranean littoral. Owing to th…	Geozavod Inst Hydrogeol & Engn Geol, Belgrade 11000, Serbia		Mijatovic, B (corresponding author), Geozavod Inst Hydrogeol & Engn Geol, POB 275, Belgrade 11000, Serbia.	hgig@beotel.yu							5	17	17	0	8	SPRINGER	NEW YORK	233 SPRING ST, NEW YORK, NY 10013 USA	0943-0105			ENVIRON GEOL	Environ. Geol.	JAN	2007	51	5
C	Liyaqati, MB		Aminipouri, B; Ghoddousi, J		Liyaqati, MB			A glimpse at the history of conduits	PROCEEDINGS OF THE 8TH INTERNATIONAL CONFERENCE ON RAINWATER CATCHMENT SYSTEMS, VOL 3: RAINWATER CATCHMENT FOR SURVIVAL: RELIGIOUS AND CULTURAL ASPECTS			English	Proceedings Paper	8th International Conference on Rainwater Catchment Systems	APR 25-29, 1997	TEHRAN, IRAN	Minist Jihad E Sazandegi,Int Rainwater Catchment Syst Assoc				The term 'Kahriz' or 'Kohriz' is the water flowing from the higher elevation of a mountain in the form of seepage spring. Over 3,000 years ago, Iranians found out that a special layer of the earth existed at the foot of the mountains, especially tail ones, where water would accumulate under the subterranean area due to the impregnable nature of the layers located on top of the trapped water which…	Off Representat Supreme Jurisprudent, Dept Farhang E Jihad Quarterly, Qom 186, Iran										0	0	0	0	0	SOIL CONSERVATION & WATERSHED MANAGEMENT RESEARCH CENTER	TEHRAN	POB 13445-1136, TEHRAN, IRAN							1997
6
[truncated: 22 more columns]

## Sheet: Italy
Publication Type	Authors	Book Authors	Book Editors	Book Group Authors	Author Full Names	Book Author Full Names	Group Authors	Article Title	Source Title	Book Series Title	Book Series Subtitle	Language	Document Type	Conference Title	Conference Date	Conference Location	Conference Sponsor	Conference Host	Author Keywords	Keywords Plus	Abstract	Addresses	Affiliations	Reprint Addresses	Email Addresses	Researcher Ids	ORCIDs	Funding Orgs	Funding Name Preferred	Funding Text	Cited References	Cited Reference Count	Times Cited, WoS Core	Times Cited, All Databases	180 Day Usage Count	Since 2013 Usage Count	Publisher	Publisher City	Publisher Address	ISSN	eISSN	ISBN	Journal Abbreviation	Journal ISO Abbreviation	Publication Date	Publication Year	Volume	Issue	Part Number
C	Parise, M; Liso, IS		Andreo, B; Barbera, JA; Duran-Valsero, JJ; Gil-Marquez, JM; Mudarra, M		Parise, M.; Liso, I. S.			The Link Between Man and Water in Karst, Through Examples From Apulia (S Italy)	EUROKARST 2022: ADVANCES IN THE HYDROGEOLOGY OF KARST AND CARBONATE RESERVOIRS	Advances in Karst Science		English	Proceedings Paper	3rd European Bi-Annual Conference on the Hydrogeology of Karst and Carbonate Reservoirs (Eurokarst)	JUN 22-25, 2022	Malaga, SPAIN	Univ Malaga,UNESCO, Intergovernmental Hydrol Programme,Van Walt,Valeport Water,Int Assoc Hydrogeologist,Springer Verlag AG,Acad Malaguena Ciencias,Fundac Cueva Nerja,TRAQUA,Sondeos Martinez,Tetraedre,Albillia,FluoTechnik,Picarro,Distribuciones Ind & Cientificas,EIC Grp		Springs; Water; History; Apulia	IMPACTS	In this contribution three different sites from the Apulian karst of southern Italy are illustrated about the issue of water flowing out in caves, and how these latter represented remarkable sites for the historical development of ancient local communities. The goal of the work is to highlight the strong link between water and human presence, and the related cults, in the karst settings of Apulia…	[Parise, M.; Liso, I. S.] Univ Aldo Moro, Dept Earth & Environm Sci, Via Edoardo Orabona 4, I-70125 Bari, Italy	Universita degli Studi di Bari Aldo Moro	Parise, M (corresponding author), Univ Aldo Moro, Dept Earth & Environm Sci, Via Edoardo Orabona 4, I-70125 Bari, Italy.	mario.parise@uniba.it							37	0	0	1	2	SPRINGER INTERNATIONAL PUBLISHING AG	CHAM	GEWERBESTRASSE 11, CHAM, CH-6330, SWITZERLAND	2511-2066	2511-2082	978-3-031-16879-6	ADV KARST SCI			2023
J	Stevenazzi, S; Zuffetti, C; Camera, CAS; Lucchelli, A; Beretta, GP; Bersezio, R; Masetti, M				Stevenazzi, Stefania; Zuffetti, Chiara; Camera, Corrado A. S.; Lucchelli, Alice; Beretta, Giovanni Pietro; Bersezio, Riccardo; Masetti, Marco			Hydrogeological characteristics and water availability in the mountainous aquifer systems of Italian Central Alps: A regional scale approach	JOURNAL OF ENVIRONMENTAL MANAGEMENT			English	Article						Groundwater body; Groundwater budget; Groundwater quality; Stable isotope analysis; Geological modelling; Italy	CLIMATE-CHANGE; KARST AQUIFERS; ROCK GLACIERS; GROUNDWATER; PRECIPITATION; EVAPOTRANSPIRATION; AREAS; INVENTORY; EXAMPLE; BASIN	Groundwater resources in mountain areas are strategically important to maintain adequate water supply for domestic uses, farming, industrial activities, and energy production, also considering the expected growing demand due to ongoing climate changes. Within this framework, the objective of the study is to develop a regional approach, compliant with the European requirements of the Water Framewo…	[Stevenazzi, Stefania] Univ Napoli Federico II, Dipartimento Ingn Civile Edile & Ambientale, 80 Piazzale Tecchio, I-80125 Naples, Italy; [Zuffetti, Chiara; Camera, Corrado A. S.; Lucchelli, Alice; Beretta, Giovanni Pietro; Bersezio, Riccardo; Masetti, Marco] Univ Milan, Dipartimento Sci Terra A Desio, Via Luigi Mangiagalli, 34, I-20133 Milan, Italy	University of Naples Federico II; University of Milan	Camera, CAS (corresponding author), Univ Milan, Dipartimento Sci Terra A Desio, Via Luigi Mangiagalli, 34, I-20133 Milan, Italy.	corrado.camera@unimi.it	zuffetti, chiara/AAO-2066-2020; Masetti, Marco/N-6823-2013	Masetti, Marco/0000-0001-7961-8046; Stevenazzi, Stefania/0000-0003-2855-9829; ZUFFETTI, CHIARA/0000-0002-7391-4829; Lucchelli, Alice/0000-0003-0428-5210	Regione Lombardia in the framework of a collaboration agreement with the Dipartimento di Scienze della Terra A. Desio of the Universita degli Studi di Milano	Regione Lombardia in the framework of a collaboration agreement with the Dipartimento di Scienze della Terra A. Desio of the Universita degli Studi di Milano	This study was partially supported by Regione Lombardia in the framework of a collaboration agreement with the Dipartimento di Scienze della Terra A. Desio of the Universita degli Studi di Milano. The authors also thank ARPA Regione Lombardia and the local water supply companies for supporting spring water sampling.When this study began, S. Stevenazzi was affiliated with the Dipartimento di Scien…		88	1	1	6	9	ACADEMIC PRESS LTD- ELSEVIER SCIENCE LTD	LONDON	24-28 OVAL RD, LONDON NW1 7DX, ENGLAND	0301-4797	1095-8630		J ENVIRON MANAGE	J. Environ. Manage.	AUG 15	2023	340
J	Ranghetti, L; Boschetti, M				Ranghetti, Luigi; Boschetti, Mirco			Updated trends of water management practice in the Italian rice paddies from remotely sensed imagery	EUROPEAN JOURNAL OF REMOTE SENSING			English	Article						Flood mapping; MODIS; rice crop; optical remote sensing; water monitoring	MODIS; IRRIGATION	The rice growing district in northwestern Italy, where paddies were traditionally flooded throughout spring, was interested by a general decrease of standing water presence caused by the adoption of dry seeding crop practices, with consequences for water management and for the ecology of breeding waterbirds. This communication analyses changes in flooding dynamics in the last four years, estimati…	[Ranghetti, Luigi] IBF Servizi SpA, Via Cavicchini 2, FE-44037 Jolanda Di Savoia, Italy; [Ranghetti, Luigi; Boschetti, Mirco] CNR, Inst Remote Sensing Environm, Milan, Italy	Consiglio Nazionale delle Ricerche (CNR)	Ranghetti, L (corresponding author), IBF Servizi SpA, Via Cavicchini 2, FE-44037 Jolanda Di Savoia, Italy.	luigi@ranghetti.info	Boschetti, Mirco/C-9351-2017; Ranghetti, Luigi/N-8770-2016	Boschetti, Mirco/0000-0003-2156-4166; Ranghetti, Luigi/0000-0001-6207-5188					41	3	3	4	46	TAYLOR & FRANCIS LTD	ABINGDON	2-4 PARK SQUARE, MILTON PARK, ABINGDON OR14 4RN, OXON, ENGLAND		2279-7254		EUR J REMOTE SENS	Eur. J. Remote Sens.	DEC 31	2022	55	1
J	Loffredo, F				Loffredo, Fernando			A CAPTIVE HISTORY OF SCULPTURE: ABDUCTING ITALIAN FOUNTAINS IN THE EARLY MODERN SPANISH MEDITERRANEAN	JOURNAL OF THE WARBURG AND COURTAULD INSTITUTES			English	Article								This article explores the transformative power of art circulation by analysing surprising nar-ratives of abducted fountains across the early modern Mediterranean area under the polit-ical influence of the Spanish Empire. The object of this study will be the stories of Italian fountains stolen by Spanish viceroys or rescued during naval skirmishes between the Holy League and the Ottoman Empire. Th…	[Loffredo, Fernando] SUNY Stony Brook, Stony Brook, NY 11794 USA	State University of New York (SUNY) System; State University of New York (SUNY) Stony Brook	Loffredo, F (corresponding author), SUNY Stony Brook, Stony Brook, NY 11794 USA.								146	0	0	1	1	WARBURG INST	LONDON	UNIV LONDON WOBURN SQUARE, LONDON WC1H 0AB, ENGLAND	0075-4390	2044-0014		J WARBURG COURTAULD	J. Warbg. Court. Inst.		2022	85
J	Piscopo, V; Sbarbati, C; Lotti, F; Lana, L; Petitta, M				Piscopo, Vincenzo; Sbarbati, Chiara; Lotti, Francesca; Lana, Luigi; Petitta, Marco			Sustainability Indicators of Groundwater Withdrawal in a Heavily Stressed System: The Case of the Acque Albule Basin (Rome, Italy)	SUSTAINABILITY			English	Article						sustainable yield; thermal water; residual discharge; Acque Albule Basin	WATER-BUDGET MYTH; SAFE YIELD; PLEISTOCENE; TRAVERTINES; SCIENCE; TIVOLI	Groundwater sustainable yield is a concept widely treated theoretically in the literature. Moving from theoretical concepts to the definition of practical measures for groundwater management is not easy due to site-specific characteristics of the system. This study is aimed at identifying which factors influence the sustainable yield of the plain of Tivoli (Central Italy), where thermal springs w…	[Piscopo, Vincenzo; Sbarbati, Chiara] Tuscia Univ, Dept Ecol & Biol Sci, I-01100 Viterbo, Italy; [Lotti, Francesca] SYMPLE Srl, Piazza Cura 7, I-01019 Vetralla, Italy; [Lotti, Francesca; Lana, Luigi] Katadima Srl, Lgo F Baracca 18, I-01019 Vetralla, Italy; [Petitta, Marco] Univ Roma La Sapienza, Earth Sci Dept, I-00185 Rome, Italy	Tuscia University; Sapienza University Rome	Sbarbati, C (corresponding author), Tuscia Univ, Dept Ecol & Biol Sci, I-01100 Viterbo, Italy.	chiara.sbarbati@unitus.it		PETITTA, Marco/0000-0003-1137-6137; SBARBATI, Chiara/0000-0002-0294-1918; PISCOPO, Vincenzo/0000-0001-8006-0940	Department of Ecological and Biological Sciences (2021) of the University of Tuscia; PNRR Geosciences IR (Missione 4 Istruzione e Ricerca-Componente 2 Dalla ricerca all'impresa-Linea di investimento 3.1, Fondo per la realizzazione di un Sistema integrato di infrastrutture di ricerca e innovazione Finanziato dall'Unione Europea Next [CUP I53C22000800006]	Department of Ecological and Biological Sciences (2021) of the University of Tuscia; PNRR Geosciences IR (Missione 4 Istruzione e Ricerca-Componente 2 Dalla ricerca all'impresa-Linea di investimento 3.1, Fondo per la realizzazione di un Sistema integrato di infrastrutture di ricerca e innovazione Finanziato dall'Unione Europea Next	This project was supported by a grant from the Department of Ecological and Biological Sciences (2021) of the University of Tuscia and by a grant from PNRR Geosciences IR (Missione 4 Istruzione e Ricerca-Componente 2 Dalla ricerca all'impresa-Linea di investimento 3.1, Fondo per la realizzazione di un Sistema integrato di infrastrutture di ricerca e innovazione Finanziato dall'Unione Europea Next…		53	1	1	1	1	MDPI	BASEL	ST ALBAN-ANLAGE 66, CH-4052 BASEL, SWITZERLAND		2071-1050		SUSTAINABILITY-BASEL	Sustainability	NOV	2022	14	22
J	Mondani, M; Gizzi, M; Taddia, G				Mondani, Michele; Gizzi, Martina; Taddia, Glenda			Role of Snowpack-Hydrometeorological Sensors for Hydrogeological System Comprehension inside an Alpine Closed-Basin	SENSORS			English	Article						hydrogeology; climate change; groundwater monitoring; mountain spring; Italy	PRECIPITATION EXTREMES; CLIMATE-CHANGE; WATER; VARIABILITY; IMPACTS	Groundwater resource assessment and forecasting in mountain areas requires the monitoring of two conditions, local meteorological conditions, and springs' groundwater parameters. The reliability of the monitoring data and conditions are linked to the technical instrumentation, multiparametric probes, and sensors. This paper presents a set of attractive tools and sensors for springs' groundwater r…	[Mondani, Michele; Gizzi, Martina; Taddia, Glenda] Politecn Torino, Dept Environm Land & Infrastruct Engn DIATI, I-10129 Turin, Italy	Polytechnic University of Turin	Taddia, G (corresponding author), Politecn Torino, Dept Environm Land & Infrastruct Engn DIATI, I-10129 Turin, Italy.	glenda.taddia@polito.it	Mondani, Michele/HTP-0832-2023; Gizzi, Martina/HJG-6624-2022	Mondani, Michele/0000-0002-1156-8342; Gizzi, Martina/0000-0001-7791-3260	Sommer GmbH Co.	Sommer GmbH Co.	This article is in memory of Marina De Maio, who had the intuition of the potentiality of this research and passed away before this work had been concluded. The Authors are extremely grateful to Enrico Suozzi, who started this work and made the preliminary results at the beginning of the Mascognaz site creation. A special thanks is devoted to Corr-Tek, San Giovanni Lupatoto, Italy, and Sommer Gmb…		43	1	1	1	3	MDPI	BASEL	ST ALBAN-ANLAGE 66, CH-4052 BASEL, SWITZERLAND		1424-8220		SENSORS-BASEL	Sensors	OCT	2022	22	19
J	Cusano, D; Allocca, V; Coda, S; Lepore, D; Vassallo, M; De Vita, P				Cusano, Delia; Allocca, Vincenzo; Coda, Silvio; Lepore, Daniele; Vassallo, Massimiliano; De Vita, Pantaleone			The survey of Italian springs by the National Hydrographic Service, a forgotten database. Structuring and analysis of a dataset of Campania springs (southern Italy)	ACQUE SOTTERRANEE-ITALIAN JOURNAL OF GROUNDWATER			English	Article						discharge measurements; spring survey; Campania region; hydrogeological characterization	GROUNDWATER-FLOW; KARST AQUIFERS; CLIMATE-CHANGE; APENNINES	The analysis of groundwater resources is a particularly significant aspect of the economic, social and environmental development of the national territory. This is particularly relevant for the Campania region which, although characterized by the most significant aquifer systems of southern Italy, suffers from critical issues related to the progressive increase in demand and climatic variability …	[Cusano, Delia; Allocca, Vincenzo; Coda, Silvio; Lepore, Daniele] Univ Naples Federico II, Dept Earth Environm & Resources Sci DiSTAR, Naples, Italy; [De Vita, Pantaleone] InterUniv Ctr Predict & Prevent Major Hazards CUG, Naples, Italy	University of Naples Federico II	Cusano, D; Allocca, V (corresponding author), Univ Naples Federico II, Dept Earth Environm & Resources Sci DiSTAR, Naples, Italy.	delia.cusano@unina.it; vincenzo.allocca@unina.it	Coda, Silvio/GQA-9297-2022; Lepore, Daniele/JJF-1678-2023	Lepore, Daniele/0000-0003-2166-0940; Cusano, Delia/0000-0002-6751-7990; Coda, Silvio/0000-0003-2744-4771					38	1	1	0	0	PAGEPRESS PUBL	PAVIA	MEDITGROUP, VIA G BELLI, 4, PAVIA, 27100, ITALY	1828-454X			ACQUE SOTTER	Acque Sotter.		2022	11	2
J	Romano, D; Magazù, S; Sabatino, G; Di Bella, M; Tripodo, A; Nania, G; Gattuso, A; Italiano, F				Romano, D.; Magazu, S.; Sabatino, G.; Di Bella, M.; Tripodo, A.; Nania, G.; Gattuso, A.; Italiano, F.			Radon concentration in groundwater of north-eastern Sicily (Italy)	JOURNAL OF INSTRUMENTATION			English	Article						Dosimetry concepts and apparatus; Radiation calculations; Radiation damage evaluation methods	METAMORPHIC EVOLUTION; RN-222 ACTIVITY; DRINKING-WATER; PELORITANI; ARCHITECTURE; EXPOSURE; BELT	This paper presents analyses of Rn-222 activity concentration performed on groundwater samples collected from wells and natural springs in 70 different sites of the crystalline area of north-eastern Sicily (southern Italy), up to now poorly studied. Alpha spectroscopy of the short-lived radon progeny was used to measure the Rn-222 activity concentration by means of the Durridge RAD7 + H2O setup. …	[Romano, D.; Magazu, S.; Sabatino, G.; Tripodo, A.; Nania, G.] Univ Messina, Dipartimento Sci Matemat & Informat, Sci Fis & Sci Terra MIFT, Viale Stagno dAlcontres 31, I-98166 Messina, Italy; [Romano, D.; Di Bella, M.; Gattuso, A.; Italiano, F.] Ist Nazl Geofis & Vulcanol, Sez Palermo, Via Ugo La Malfa 153, I-90146 Palermo, Italy; [Romano, D.; Di Bella, M.; Gattuso, A.; Italiano, F.] Ist Nazl Geo…	University of Messina; Istituto Nazionale Geofisica e Vulcanologia (INGV); Istituto Nazionale Geofisica e Vulcanologia (INGV)	Romano, D (corresponding author), Univ Messina, Dipartimento Sci Matemat & Informat, Sci Fis & Sci Terra MIFT, Viale Stagno dAlcontres 31, I-98166 Messina, Italy.;Romano, D (corresponding author), Ist Nazl Geofis & Vulcanol, Sez Palermo, Via Ugo La Malfa 153, I-90146 Palermo, Italy.;Romano, D (corresponding author), Ist Nazl Geofis & Vulcanol, Sez Palermo, Sede Operat Milazzo, Via Mille 46, I-980…	davide.romano@ingv.it		Romano, Davide/0000-0002-2122-0737	FSE (Fondo Sociale Europeo)	FSE (Fondo Sociale Europeo)	This study was funded by the FSE (Fondo Sociale Europeo) operational program (OP) for Sicily 2014-2020 and it represents a part of the PhD thesis of Davide Romano (PhD in Physics at the University of Messina) . The authors thank Janja Vaupotic for her precious advices that improved the quality of the manuscript, and Carmelo Allegra, Davide Calabr?, Marco Fiumara, Andrea Maio and Antonio Torre for…		56	1	1	0	0	IOP Publishing Ltd	BRISTOL	TEMPLE CIRCUS, TEMPLE WAY, BRISTOL BS1 6BE, ENGLAND	1748-0221			J INSTRUM	J. Instrum.	SEP	2022	17	9
J	Masciale, R; Amalfitano, S; Frollini, E; Ghergo, S; Melita, M; Parrone, D; Preziosi, E; Vurro, M; Zoppini, A; Passarella, G				Masciale, Rita; Amalfitano, Stefano; Frollini, Eleonora; Ghergo, Stefano; Melita, Marco; Parrone, Daniele; Preziosi, Elisabetta; Vurro, Michele; Zoppini, Annamaria; Passarella, Giuseppe			Assessing Natural Background Levels in the Groundwater Bodies of the Apulia Region (Southern Italy)	WATER			English	Article						groundwater; natural background levels; Italian guidelines; pre-selection method	SELENIUM; VALUES; QUALITY; BASIN	Defining natural background levels (NBL) of geochemical parameters in groundwater is a key element for establishing threshold values and assessing the environmental state of groundwater bodies (GWBs). In the Apulia region (Italy), carbonate sequences and clastic sediments host the 29 regional GWBs. In this study, we applied the Italian guidelines for the assessment of the NBLs, implementing the E…	[Masciale, Rita; Vurro, Michele; Passarella, Giuseppe] Natl Res Council IRSA CNR, Water Res Inst, I-70132 Bari, Italy; [Amalfitano, Stefano; Frollini, Eleonora; Ghergo, Stefano; Melita, Marco; Parrone, Daniele; Preziosi, Elisabetta; Zoppini, Annamaria] Natl Res Council IRSA CNR, Water Res Inst, I-00015 Rome, Italy	Consiglio Nazionale delle Ricerche (CNR); Istituto di Ricerca sulle Acque (IRSA-CNR); Consiglio Nazionale delle Ricerche (CNR); Istituto di Ricerca sulle Acque (IRSA-CNR)	Parrone, D (corresponding author), Natl Res Council IRSA CNR, Water Res Inst, I-00015 Rome, Italy.	rita.masciale@cnr.it; amalfitano@irsa.cnr.it; frollini@irsa.cnr.it; ghergo@irsa.cnr.it; melita@irsa.cnr.it; parrone@irsa.cnr.it; preziosi@irsa.cnr.it; michele.vurro@cnr.it; zoppini@irsa.cnr.it; giuseppe.passarella@cnr.it	Passarella, Giuseppe/F-8273-2013; Preziosi, Elisabetta/I-6416-2019; Amalfitano, Stefano/C-6737-2012; Zoppini, Annamaria/J-7458-2016	Passarella, Giuseppe/0000-0001-5101-9826; Preziosi, Elisabetta/0000-0002-7645-2121; Amalfitano, Stefano/0000-0002-6148-1472; Parrone, Daniele/0000-0002-0153-1474; Zoppini, Annamaria/0000-0003-2474-5173; FROLLINI, Eleonora/0000-0003-0304-0481; Melita, Marco/0000-0002-7693-4411; Masciale, Rita/0000-0003-3891-0977	Apulia Region, Regional Department of Water Resources Management	Apulia Region, Regional Department of Water Resources Management	The VIOLA project has been funded by Apulia Region, Regional Department of Water Resources Management, within the frame of the Regional Operational Program (ROP) E.R.D.F.-E.S.F. 2014/2020.		49	12	12	4	16	MDPI	BASEL	ST ALBAN-ANLAGE 66, CH-4052 BASEL, SWITZERLAND		2073-4441		WATER-SUI	Water	APR	2021	13	7
J	Paternoster, M; Buccione, R; Canora, F; Buttitta, D; Panebianco, S; Rizzo, G; Sinisi, R; Summa, V; Mongelli, G				Paternoster, M.; Buccione, R.; Canora, F.; Buttitta, D.; Panebianco, S.; Rizzo, G.; Sinisi, R.; Summa, V; Mongelli, G.			Hydrogeochemistry and Groundwater Quality Assessment in the High Agri Valley (Southern Italy)	GEOFLUIDS			English	Article							SOURCE APPORTIONMENT; IRRIGATION; DRINKING; ORIGIN; WATERS; PRECIPITATION; SUITABILITY; APENNINES; AQUIFERS; CALABRIA	The High Agri Valley (southern Italy) is one of the largest intermontane basin of the southern Apennines affected by intensive agricultural and industrial activities. The study of groundwater chemical features provides much important information useful in water resource management. In this study, hydrogeochemical investigations coupled with multivariate statistics, saturation indices, and stable …	[Paternoster, M.; Buccione, R.; Buttitta, D.; Panebianco, S.; Rizzo, G.; Mongelli, G.] Univ Basilicata, Dept Sci, Viale AteneoLucano 10,Campus Macchia Romana, I-85100 Potenza, Italy; [Paternoster, M.] Natl Inst Geophys & Volcanol INGV, Sect Palermo, I-90153 Palermo, Italy; [Canora, F.] Univ Basilicata, Sch Engn, Viale Ateneo Lucano 10,Campus Macchia Romana, I-85100 Potenza, Italy; [Panebianco, S.…	University of Basilicata; Italfarmaco; Istituto Nazionale Geofisica e Vulcanologia (INGV); University of Basilicata; Consiglio Nazionale delle Ricerche (CNR); Istituto di Metodologie per l'Analisi Ambientale (IMAA-CNR)	Paternoster, M (corresponding author), Univ Basilicata, Dept Sci, Viale AteneoLucano 10,Campus Macchia Romana, I-85100 Potenza, Italy.;Paternoster, M (corresponding author), Natl Inst Geophys & Volcanol INGV, Sect Palermo, I-90153 Palermo, Italy.	michele.paternoster@unibas.it	Buttitta, Dario/HSI-3472-2023; Canora, Filomena/G-5712-2018; Sinisi, Rosa/AAR-2152-2021; Panebianco, Serena/AAB-6812-2022; Paternoster, Michele/L-4636-2016	Buttitta, Dario/0000-0002-2652-262X; Canora, Filomena/0000-0003-1877-4605; Panebianco, Serena/0000-0003-4063-1061; Buccione, Roberto/0000-0003-4264-531X; RIZZO, GIOVANNA/0000-0002-1243-6325; SUMMA, VITO/0000-0002-1345-5683; Paternoster, Michele/0000-0003-0212-0949; MONGELLI, GIOVANNI/0000-0001-8411-2154; Sinisi, Rosa/0000-0003-4439-3419	Italian PRIN-MIUR programme [20174X3P29]; RIL2009-Unibas	Italian PRIN-MIUR programme(Ministry of Education, Universities and Research (MIUR)); RIL2009-Unibas	The authors are indebted to Prof. ssa Giuliana Bianco and Dr. Raffaella Pascale for their support during chemical analysis at University of Basilicata. This research has been supported by a grant (RIL2009-Unibas) of G. Mongelli and M. Paternoster and partially by the project Detection and tracking of crustal fluid by multi-parametric methodolo-gies and technologies of the Italian PRIN-MIUR progra…		61	4	4	3	6	WILEY-HINDAWI	LONDON	ADAM HOUSE, 3RD FL, 1 FITZROY SQ, LONDON, WIT 5HE, ENGLAND	1468-8115	1468-8123		GEOFLUIDS	Geofluids	JUN 25	2021	2021
J	Segadelli, S; Filippini, M; Monti, A; Celico, F; Gargini, A				Segadelli, Stefano; Filippini, Maria; Monti, Anna; Celico, Fulvio; Gargini, Alessandro			Estimation of recharge in mountain hard-rock aquifers based on discrete spring discharge monitoring during base-flow recession	HYDROGEOLOGY JOURNAL			English	Article						Fractured rocks; Italy; Groundwater recharge; Base-flow recession; Power-law correlation	NORTHERN APENNINES; GROUNDWATER RECHARGE; MT. PRINZERA; TURBIDITES; MODEL	Estimation of aquifer recharge is key to effective groundwater management and protection. In mountain hard-rock aquifers, the average annual discharge of a spring generally reflects the vertical aquifer recharge over the spring catchment. However, the determination of average annual spring discharge requires expensive and challenging field monitoring. A power-law correlation was previously report…	[Segadelli, Stefano] Emilia Romagna Reg Adm, Geol Seism & Soil Serv, Viale Fiera 8, I-4027 Bologna, Italy; [Filippini, Maria; Monti, Anna; Gargini, Alessandro] Alma Mater Studiorum Univ Bologna, Dept Biol Geol & Environm Sci, Via Zamboni 67, I-40126 Bologna, Italy; [Celico, Fulvio] Univ Parma, Dept Chem Life Sci & Environm Sustainabil, Parco Area Sci 157-A, I-43124 Parma, Italy	University of Bologna; University of Parma	Filippini, M (corresponding author), Alma Mater Studiorum Univ Bologna, Dept Biol Geol & Environm Sci, Via Zamboni 67, I-40126 Bologna, Italy.	maria.filippini3@unibo.it	Filippini, Maria/AAW-1358-2020	Filippini, Maria/0000-0001-5050-5072; segadelli, stefano/0000-0001-5260-6256; Gargini, Alessandro/0000-0002-9271-219X	Alma Mater Studiorum Universita di Bologna within the CRUI-CARE Agreement	Alma Mater Studiorum Universita di Bologna within the CRUI-CARE Agreement	Open access funding provided by Alma Mater Studiorum Universita di Bologna within the CRUI-CARE Agreement.		52	4	4	0	8	SPRINGER	NEW YORK	ONE NEW YORK PLAZA, SUITE 4600, NEW YORK, NY, UNITED STATES	1431-2174	1435-0157		HYDROGEOL J	Hydrogeol. J.	MAY	2021	29	3
J	Musacchio, A; Mas-Pla, J; Soana, E; Re, V; Sacchi, E				Musacchio, Arianna; Mas-Pla, Josep; Soana, Elisa; Re, Viviana; Sacchi, Elisa			Governance and groundwater modelling: Hints to boost the implementation of the EU Nitrate Directive. The Lombardy Plain case, N Italy	SCIENCE OF THE TOTAL ENVIRONMENT			English	Article						Socio-hydrogeology; Agricultural practices; Backcasting; Soil System Budget; Po plain; Irrigation	MANAGEMENT-PRACTICES; WATER GOVERNANCE; PO RIVER; NORTHERN; CONTAMINATION; CHALLENGES; MITIGATION; EVOLUTION; POLLUTION; INSIGHTS	The EU Nitrate Directive has been ruling for almost 30 years, nevertheless nitrate concentration in the Lombardy Plain did not decrease. Together with failures of management implementation, a possible cause for such field observations is that management actions were taken without adequately considering the actual hydrogeological dynamics. To consider this aspect, the paper presents a groundwater …	[Musacchio, Arianna; Re, Viviana; Sacchi, Elisa] Univ Pavia, Dept Earth & Environm Sci, Via Ferrata 1, I-27100 Pavia, Italy; [Musacchio, Arianna; Mas-Pla, Josep] Univ Girona, Inst Catala Recerca Aigua ICRA, C Amili Grahit 101, Girona 17003, Spain; [Musacchio, Arianna; Mas-Pla, Josep] Univ Girona, Dept Ciencies Ambientals, GAiA Geocamb, C Amili Grahit 101, Girona 17003, Spain; [Soana, Elisa] Univ …	University of Pavia; Institut Catala de Recerca de l'Aigua (ICRA); Universitat de Girona; Universitat de Girona; University of Ferrara; University of Pisa	Musacchio, A (corresponding author), Univ Pavia, Dept Earth & Environm Sci, Via Ferrata 1, I-27100 Pavia, Italy.	arianna.musacchio@gmail.com	Re, Viviana/O-1540-2019; Mas-Pla, Josep/B-9582-2009	Re, Viviana/0000-0001-6002-0159; Mas-Pla, Josep/0000-0002-8491-9895	Cariplo Foundation [2015-0263]; Spanish Research Program [FEDER-MCIU-AEI/CGL2017-87216-C4-4-R]	Cariplo Foundation(Fondazione Cariplo); Spanish Research Program(Spanish Government)	This work was developed in the frame of the project Squaring the cycle: the INTEgration of GROundwater processes in Nutrient budgets for a basin-oriented remediation strategy (INTEGRON), involving the University of Pavia, the CNR-IRSA and the University of Parma, and supported by the Cariplo Foundation (Grant number: 2015-0263). Numerical modelling aims and procedures also benefit from project PA…		80	9	9	5	27	ELSEVIER	AMSTERDAM	RADARWEG 29, 1043 NX AMSTERDAM, NETHERLANDS	0048-9697	1879-1026		SCI TOTAL ENVIRON	Sci. Total Environ.	AUG 15	2021	782
J	Gargini, A; Stefani, A; Vannini, S				Gargini, Alessandro; Stefani, Alessandro; Vannini, Stefano			The groundwater flow system of Terme Alte (Alto Reno Terme, Bologna, Italy).	ACQUE SOTTERRANEE-ITALIAN JOURNAL OF GROUNDWATER			Italian	Article						Porretta Terme; hydrogeology; thermal water; hydrodynamic parametrization; aquifer		The thermal field of Porretta Terme, located in the Alto Reno Terme municipality (Bologna), has always raised interest for its peculiar waters since ancient times. Indeed, the use of the springs dates back to the I-II century A.D. and perhaps even in the Etruscan period. Porretta's thermal tradition has developed over the centuries. First regulation, issued in 1936, allowed to cultivate the miner…	[Stefani, Alessandro] Univ Bologna, Alma Mater Studiorum, Biol Geol & Environm Sci Dept, Bologna, Italy; [Vannini, Stefano] Thermal Field Terme Porretta, Porretta Terme, Italy	University of Bologna	Stefani, A (corresponding author), Univ Bologna, Alma Mater Studiorum, Biol Geol & Environm Sci Dept, Bologna, Italy.	alessandro.stefani7@studio.unibo.it							36	0	0	0	1	PAGEPRESS PUBL	PAVIA	MEDITGROUP, VIA G BELLI, 4, PAVIA, 27100, ITALY	1828-454X			ACQUE SOTTER	Acque Sotter.		2020	9	2
J	Saroli, M; Lancia, M; Petitta, M				Saroli, Michele; Lancia, Michele; Petitta, Marco			The geology and hydrogeology of the Cassino plain (central Apennines, Italy): redefining the regional groundwater balance	HYDROGEOLOGY JOURNAL			English	Article						Conceptual model; Groundwater management; Italy; Karst; Tectonics		Cassino plain is a Quaternary intermontane basin of the central-southern Apennines, Italy. The plain has outstanding groundwater resources (total discharge of 23,000 L/s), thanks to the huge karst basins that surround the area. The area has been involved in many hydrogeological interests since the 1970s due to the economic importance and construction of the Western Campania Aqueduct for the water…	[Saroli, Michele] Univ Cassino & Lazio Meridionale, Dipartimento Ingn Civile & Meccan, Via G Di Biasio 43, I-03043 Cassino, Italy; [Lancia, Michele] Southern Univ Sci & Technol, Sch Environm Sci & Engn, Guangdong Prov Key Lab Soil & Groundwater Pollut, Shenzhen 518055, Peoples R China; [Lancia, Michele] Southern Univ Sci & Technol, Sch Environm Sci & Engn, State Environm Protect Key Lab Integrate…	University of Cassino; Southern University of Science & Technology; Southern University of Science & Technology; Sapienza University Rome	Lancia, M (corresponding author), Southern Univ Sci & Technol, Sch Environm Sci & Engn, Guangdong Prov Key Lab Soil & Groundwater Pollut, Shenzhen 518055, Peoples R China.;Lancia, M (corresponding author), Southern Univ Sci & Technol, Sch Environm Sci & Engn, State Environm Protect Key Lab Integrated Surface, Shenzhen 518055, Peoples R China.	lancia@sustc.edu.cn	Petitta, Marco/D-3848-2009; Lancia, Michele/AAM-3275-2020	Petitta, Marco/0000-0003-1137-6137; Lancia, Michele/0000-0002-4862-5179					42	3	3	0	6	SPRINGER	NEW YORK	ONE NEW YORK PLAZA, SUITE 4600, NEW YORK, NY, UNITED STATES	1431-2174	1435-0157		HYDROGEOL J	Hydrogeol. J.	AUG	2019	27	5
J	Piccini, L; Di Lorenzo, T; Costagliola, P; Galassi, DMP				Piccini, Leonardo; Di Lorenzo, Tiziana; Costagliola, Pilario; Galassi, Diana Maria Paola			Marble Slurry's Impact on Groundwater: The Case Study of the Apuan Alps Karst Aquifers	WATER			English	Article						groundwater; karst aquifer; pollution; quarry; Apuan Alps	ECOSYSTEM SERVICES; PATTERNS; CAVE; INVERTEBRATES; BIODIVERSITY; ENVIRONMENT; FAUNA; DIVERSITY; CRUSTACEA; POLLUTION	Modern sawing techniques employed in ornamental stones' exploitation produce large amounts of slurry that can be potentially diffused into the environment by runoff water. Slurry produced by limestone and marble quarrying can impact local karst aquifers, negatively affecting the groundwater quality and generating a remarkable environmental and economic damage. A very representative case-study is …	[Piccini, Leonardo; Costagliola, Pilario] Univ Florence, Dept Earth Sci, I-50121 Florence, Italy; [Di Lorenzo, Tiziana] CNR, Natl Res Council Italy, Res Inst Terr Ecosyst, I-50019 Florence, Italy; [Galassi, Diana Maria Paola] Univ Aquila, Dept Life Hlth & Environm Sci, I-67100 Laquila, Italy	University of Florence; Consiglio Nazionale delle Ricerche (CNR); Istituto di Ricerca sugli Ecosistemi Terrestri (IRET); University of L'Aquila	Piccini, L (corresponding author), Univ Florence, Dept Earth Sci, I-50121 Florence, Italy.	leonardo.piccini@unifi.it; tiziana.dilorenzo@cnr.it; pilario.costagliola@unifi.it; dianamariapaola.galassi@univaq.it	Di Lorenzo, Tiziana/F-1544-2013; Galassi, Diana M.P./N-1674-2015	Di Lorenzo, Tiziana/0000-0002-3131-7049; Piccini, Leonardo/0000-0003-3892-050X; Galassi, Diana M.P./0000-0002-6448-2710; , Tiziana/0000-0003-2060-8294	European commission [LIFE12 BIO/IT/000231]	European commission(European Union (EU)European Commission Joint Research Centre)	This research was partially funded by the AQUALIFE project LIFE12 BIO/IT/000231 Development of an innovative and user-friendly indicator system for biodiversity in groundwater dependent ecosystems of the European commission.		56	17	17	1	11	MDPI	BASEL	ST ALBAN-ANLAGE 66, CH-4052 BASEL, SWITZERLAND		2073-4441		WATER-SUI	Water	DEC	2019	11	12
J	Giacopetti, M; Materazzi, M; Pambianchi, G; Posavec, K				Giacopetti, Marco; Materazzi, Marco; Pambianchi, Gilberto; Posavec, Kristijan			A combined approach for a modern hydrogeological mapping: the case study of Tennacola stream catchment (central Apennine, Italy)	JOURNAL OF MAPS			English	Article						Hydrogeological mapping; spring protection zones; central Italy	GROUNDWATER RECHARGE; PROTECTION ZONES; IMPLEMENTATION; RESOURCES; EXAMPLE; KARST	The current European water legislation, specifically the one addressed to groundwater for human consumption (EU Water Framework Directive, WFD-2000/60/EC), provides clear indications on the objectives and actions to be taken for the proper management and protection of water resources. In Italy, as well as in other countries of the EU, the implementation of this Directive, in the face of an adjust…	[Giacopetti, Marco; Materazzi, Marco; Pambianchi, Gilberto] Univ Camerino, Sch Sci & Technol, Camerino, Italy; [Posavec, Kristijan] Univ Zagreb, Dept Geol & Geol Engn, Zagreb, Croatia	University of Camerino; University of Zagreb	Giacopetti, M (corresponding author), Univ Camerino, Sch Sci & Technol, Camerino, Italy.	marco.giacopetti@unicam.it	Posavec, Kristijan/AAL-9109-2020; MATERAZZI, Marco/AAW-9303-2020	Posavec, Kristijan/0000-0002-5392-9329; MATERAZZI, Marco/0000-0002-9480-5680; Giacopetti, Marco/0000-0002-3066-564X					37	2	2	0	1	TAYLOR & FRANCIS LTD	ABINGDON	2-4 PARK SQUARE, MILTON PARK, ABINGDON OR14 4RN, OXON, ENGLAND	1744-5647			J MAPS	J. Maps	JUL 3	2019	15	2
J	Di Carlo, C; Lepore, L; Venoso, G; Ampollini, M; Carpentieri, C; Tannino, A; Ragno, E; Magliano, A; D'Amario, C; Remetti, R; Bochicchio, F				Di Carlo, C.; Lepore, L.; Venoso, G.; Ampollini, M.; Carpentieri, C.; Tannino, A.; Ragno, E.; Magliano, A.; D'Amario, C.; Remetti, R.; Bochicchio, F.			Radon concentration in self-bottled mineral spring waters as a possible public health issue	SCIENTIFIC REPORTS			English	Article							DRINKING-WATER	Since 2013, the Council Directive 2013/51/Euratom has been regulating the content of radioactive substances in water intended for human consumption. However, mineral waters are exempted from this regulation, including self-bottled springs waters, where higher radon concentration are expected. Therefore, a systematic survey has been conducted on all the 33 mineral spring waters of Lazio (a region …	[Di Carlo, C.; Venoso, G.; Ampollini, M.; Carpentieri, C.; Bochicchio, F.] Italian Natl Inst Hlth, Natl Ctr Radiat Protect & Computat Phys, Viale Regina Elena 299, I-00161 Rome, Italy; [Lepore, L.; Tannino, A.; Remetti, R.] Sapienza Univ Rome, Dept Basic & Appl Sci Engn, Via Antonio Scarpa 14, I-00161 Rome, Italy; [Ragno, E.] Natl Res Council CNR, Prevent & Protect Serv Off, Ple A Moro 7, I-00185…	Istituto Superiore di Sanita (ISS); Sapienza University Rome	Di Carlo, C (corresponding author), Italian Natl Inst Hlth, Natl Ctr Radiat Protect & Computat Phys, Viale Regina Elena 299, I-00161 Rome, Italy.	christian.dicarlo@iss.it	Carpentieri, Carmela/E-2137-2015; VENOSO, GENNARO/E-2139-2015; LEPORE, LUIGI/M-6060-2017	Carpentieri, Carmela/0000-0002-2994-0317; VENOSO, GENNARO/0000-0002-2855-6831; LEPORE, LUIGI/0000-0003-0088-6449; Di Carlo, Christian/0000-0002-6629-7658					25	8	8	2	7	NATURE PUBLISHING GROUP	LONDON	MACMILLAN BUILDING, 4 CRINAN ST, LONDON N1 9XW, ENGLAND	2045-2322			SCI REP-UK	Sci Rep	OCT 3	2019	9
J	Zanini, A; Petrella, E; Sanangelantoni, AM; Angelo, L; Ventosi, B; Viani, L; Rizzo, P; Remelli, S; Bartoli, M; Bolpagni, R; Chelli, A; Feo, A; Francese, R; Iacumin, P; Menta, C; Racchetti, E; Selmo, EM; Tanda, MG; Ghirardi, M; Boggio, P; Pappalardo, F; De Nardo, MT; Segadelli, S; Celico, F				Zanini, Andrea; Petrella, Emma; Sanangelantoni, Anna Maria; Angelo, Letizia; Ventosi, Beatrice; Viani, Luca; Rizzo, Pietro; Remelli, Sara; Bartoli, Marco; Bolpagni, Rossano; Chelli, Alessandro; Feo, Alessandra; Francese, Roberto; Iacumin, Paola; Menta, Cristina; Racchetti, Erica; Selmo, Enrico Maria; Tanda, Maria Giovanna; Ghirardi, Marco; Boggio, Pietro; Pappalardo, Francesco; De Nardo, Maria Te…			Groundwater characterization from an ecological and human perspective: an interdisciplinary approach in the Functional Urban Area of Parma, Italy	RENDICONTI LINCEI-SCIENZE FISICHE E NATURALI			English	Article; Proceedings Paper	Conference on Foreseeing Groundwater Resources	MAR 22, 2018	Accademia Nazl Lincei, Rome, ITALY		Accademia Nazl Lincei	Groundwater characterization; Alluvial plain; Shallow aquifer system; Interdisciplinary approach; Functional Urban Area	PLANT DIVERSITY; DISTRIBUTION PATTERNS; CARBONATE AQUIFERS; CONTAMINANT SOURCE; LOWLAND SPRINGS; OGLIO RIVER; PO PLAIN; NORTHERN; WATER; SUCCESSIONS	Inthe Parma Functional Urban Area,hydro-geo-ecology was investigated through an interdisciplinary approach, with emphasis on the shallow aquifer system. The study pointed out that domestic wells and fontanili are both fed by shallow groundwater affected by PCE and nitrate contamination, upgradient of the rural area located north of Parma City. Moreover, Folsomia candida tests suggested the possib…	[Zanini, Andrea; Angelo, Letizia; Tanda, Maria Giovanna] Univ Parma, Dept Engn & Architecture, Parma, Italy; [Petrella, Emma; Sanangelantoni, Anna Maria; Ventosi, Beatrice; Viani, Luca; Rizzo, Pietro; Remelli, Sara; Bartoli, Marco; Bolpagni, Rossano; Chelli, Alessandro; Feo, Alessandra; Francese, Roberto; Iacumin, Paola; Menta, Cristina; Racchetti, Erica; Selmo, Enrico Maria; Celico, Fulvio] Univ…	University of Parma; University of Parma; Consiglio Nazionale delle Ricerche (CNR); Istituto per lo Studio degli Ecosistemi (ISE-CNR)	Petrella, E (corresponding author), Univ Parma, Dept Chem Life Sci & Environm Sustainabil, Parma, Italy.	emma.petrella@unipr.it	Zanini, Andrea/M-1389-2014; Chelli, Alessandro/S-2851-2017; Remelli, Sara/AAI-3149-2020; Tanda, Maria Giovanna/M-1761-2014; Iacumin, Paola/AAV-8855-2021; Petrella, Emma/A-5682-2008; Bolpagni, Rossano/Q-7053-2018; Remelli, Sara/HTN-0961-2023	Zanini, Andrea/0000-0002-4022-707X; Chelli, Alessandro/0000-0001-5035-733X; Remelli, Sara/0000-0001-6816-0850; Petrella, Emma/0000-0002-4292-8814; Bolpagni, Rossano/0000-0001-9283-2821; Remelli, Sara/0000-0001-6816-0850; Tanda, Maria Giovanna/0000-0002-8357-1348; sanangelantoni, anna maria/0000-0003-4764-3436; Feo, Alessandra/0000-0002-3332-2490; segadelli, stefano/0000-0001-5260-6256; Rizzo, Pie…	UE (INTERREG Central Europe) via the AMIIGA Project	UE (INTERREG Central Europe) via the AMIIGA Project	The research was supported by UE (INTERREG Central Europe) via the AMIIGA Project. The authors would like to thank Prof. Antonio Longinelli and another anonymous reviewer for their fruitful comments.		60	19	19	0	7	SPRINGER-VERLAG ITALIA SRL	MILAN	VIA DECEMBRIO, 28, MILAN, 20137, ITALY	2037-4631	1720-0776		REND LINCEI-SCI FIS	Rend. Lincei.-Sci. Fis. Nat.	MAR	2019	30	1
J	De Giorgi, AU				De Giorgi, Andrea U.			Sustainable Practices? A Story from Roman Cosa (Central Italy)	JOURNAL OF MEDITERRANEAN ARCHAEOLOGY			English	Article						Cosa; Rome; southern Etruria; sustainability water; water-lifting devices	ARCHAEOLOGY	The thermal complex at the site of Cosa in Tuscany offers a clear example of how a Roman community, though crippled by the lack of springs or aqueducts, was nevertheless able to secure and husband sufficient water to operate a public bath, thanks to ingenious architectural adaptations and a unique strategy of water conservation. Regulated by the annual oscillation from wet to dry season and plaus…	[De Giorgi, Andrea U.] Florida State Univ, Class Dept, 324 Dodd Hall, Tallahassee, FL 32306 USA	State University System of Florida; Florida State University	De Giorgi, AU (corresponding author), Florida State Univ, Class Dept, 324 Dodd Hall, Tallahassee, FL 32306 USA.	adegiorgi@fsu.edu			Berliner Antike Kolleg; Loeb Foundation	Berliner Antike Kolleg; Loeb Foundation	I am indebted to many people and institutions: my co-director of the Cosa Excavations, R.T. Scott, the Cosa Excavations team, and in particular Matthew Brennan of Digital Cosa who provided me with images for this study. The editors of JMA, three anonymous reviewers, Jordan Pickett, Jill Weber, and Ann Glennie took the time to read an early version of this essay, providing me with most useful comm…		60	6	6	1	6	EQUINOX PUBLISHING LTD	SHEFFIELD	415, THE WORKSTATION, 15 PATERNOSTER ROW, SHEFFIELD, S1 2BX, ENGLAND	0952-7648			J MEDITERR ARCHAEOL	J. Mediterr. Archaeol.		2018	31	1
J	Barbato, M; Cirillo, L; Menditto, L; Moretti, R; Nardini, S				Barbato, M.; Cirillo, L.; Menditto, L.; Moretti, R.; Nardini, S.			Feasibility study of a geothermal energy system for indoor swimming pool in Campi Flegrei area	THERMAL SCIENCE AND ENGINEERING PROGRESS			English	Article						Geothermal energy; Low and medium temperature; Energy analysis; Indoor swimming pool		Technologies based on a renewable energy source can be an optimal solution to the heating of a swimming pool, which can be very expensive in terms of energy demand. In this work, the energy demand of a swimming pool located in Campi Flegrei area (Naples surroundings, Italy) is supplied by a geothermal plant. Campi Flegrei are a very advantageous location for a geothermal plant installation at eit…	[Barbato, M.; Cirillo, L.; Menditto, L.; Moretti, R.; Nardini, S.] Univ Campania Luigi Vanvitelli, Dipartimento Ingn Ind Informaz, Via Roma 29, I-81031 Aversa, CE, Italy; [Nardini, S.] Sun Energy Europe Srl, Acad Spin Off, Via B De Capua 26, I-81043 Capua, CE, Italy	Universita della Campania Vanvitelli	Nardini, S (corresponding author), Univ Campania Luigi Vanvitelli, Dipartimento Ingn Ind Informaz, Via Roma 29, I-81031 Aversa, CE, Italy.	sergio.nardini@unicampania.it	Nardini, Sergio/D-3128-2013	Nardini, Sergio/0000-0003-3000-8444; Cirillo, Luca/0000-0002-8705-8912					31	15	15	0	0	ELSEVIER	AMSTERDAM	RADARWEG 29, 1043 NX AMSTERDAM, NETHERLANDS	2451-9049			THERM SCI ENG PROG	Therm. Sci. Eng. Prog.	JUN	2018	6
J	Tassi, E; Grifoni, M; Bardelli, F; Aquilanti, G; La Felice, S; Iadecola, A; Lattanzi, P; Petruzzelli, G				Tassi, Eliana; Grifoni, Martina; Bardelli, Fabrizio; Aquilanti, Giuliana; La Felice, Sonia; Iadecola, Antonella; Lattanzi, Pierfranco; Petruzzelli, Gianniantonio			Evidence for the natural origins of anomalously high chromium levels in soils of the Cecina Valley (Italy)	ENVIRONMENTAL SCIENCE-PROCESSES & IMPACTS			English	Article							SERPENTINE SOILS; HEXAVALENT CHROMIUM; ULTRAMAFIC SOILS; CENTRAL GREECE; TRACE-ELEMENT; HEAVY-METALS; GROUNDWATER; CONTAMINATION; SPECTROSCOPY; CALIFORNIA	The problem of high levels of chromium is one of the most important issues in soils of the Mediterranean area, in particular those deriving from ophiolitic parent materials. Very often the chromium concentration is greater than the threshold values of legislation on soil pollution and the knowledge of the origin of contamination (natural or anthropogenic) is important to formulate risk characteri…	[Tassi, Eliana; Grifoni, Martina; Petruzzelli, Gianniantonio] CNR, ISE, Inst Ecosyst Studies, Via G Moruzzi 1, I-56124 Pisa, Italy; [Bardelli, Fabrizio] Univ Roma La Sapienza, CNR, Dept Phys, Nanotec, Ple Aldo Moro 2, I-00185 Rome, Italy; [Aquilanti, Giuliana] Elettra Sincrotrone Trieste, SS-14 Km 163-5, I-34149 Basovizza, TS, Italy; [La Felice, Sonia] CNR, IGG, Inst Geosci & Earth Resources, Via…	Consiglio Nazionale delle Ricerche (CNR); Istituto per lo Studio degli Ecosistemi (ISE-CNR); Sapienza University Rome; Consiglio Nazionale delle Ricerche (CNR); Istituto di Nanotecnologia (NANOTEC-CNR); Elettra Sincrotrone Trieste; Consiglio Nazionale delle Ricerche (CNR); Istituto di Geoscienze e Georisorse (IGG-CNR); Consiglio Nazionale delle Ricerche (CNR); Istituto di Geoscienze e Georisorse …	Tassi, E (corresponding author), CNR, ISE, Inst Ecosyst Studies, Via G Moruzzi 1, I-56124 Pisa, Italy.	eliana.tassi@ise.cnr.it	Tassi, Eliana L/I-3494-2012; Grifoni, Martina/ABF-1076-2020; La Felice, Sonia/Z-2670-2019; Lattanzi, Pierfranco/A-5817-2012	Tassi, Eliana L/0000-0002-3288-781X; Grifoni, Martina/0000-0002-9819-8814; La Felice, Sonia/0000-0002-5179-0589; Lattanzi, Pierfranco/0000-0003-4352-2709; Bardelli, Fabrizio/0000-0001-9224-8748; Iadecola, Antonella/0000-0002-9031-8455; petruzzelli, gianniantonio/0000-0002-1023-6901					42	11	12	1	20	ROYAL SOC CHEMISTRY	CAMBRIDGE	THOMAS GRAHAM HOUSE, SCIENCE PARK, MILTON RD, CAMBRIDGE CB4 0WF, CAMBS, ENGLAND	2050-7887	2050-7895		ENVIRON SCI-PROC IMP	Environ. Sci.-Process Impacts	JUN 1	2018	20	6
J	Annibaldi, A; Illuminati, S; Truzzi, C; Scarponi, G				Annibaldi, Anna; Illuminati, Silvia; Truzzi, Cristina; Scarponi, Giuseppe			Heavy Metals in Spring and Bottled Drinking Waters of Sibylline Mountains National Park (Central Italy)	JOURNAL OF FOOD PROTECTION			English	Article						Cadmium; Copper; Lead; Mineral water; Spring water; Tap water	ANODIC-STRIPPING VOLTAMMETRY; TRACE-ELEMENTS; ANTARCTIC AEROSOL; TAP WATER; LEAD; CONTAMINATION; CADMIUM; RELEASE; COPPER; PB	Heavy metal concentrations (cadmium, lead, and copper) in spring, tap, and bottled waters of the Sibylline Mountains National Park (central Italy) were investigated using square wave anodic stripping voltammetry from 2004 to 2011. The mean (+/- SD) concentrations detected (1.3 +/- 0.4 ng L-1 cadmium, 14 +/- 6 ng L-1 lead, and 0.16 +/- 0.10 mu g L-1 copper) were below the limits stipulated by Ital…	[Annibaldi, Anna; Illuminati, Silvia; Truzzi, Cristina; Scarponi, Giuseppe] Univ Politecn Marche, Dept Life & Environm Sci, Via Brecce Bianche, I-60131 Ancona, Italy	Marche Polytechnic University	Annibaldi, A (corresponding author), Univ Politecn Marche, Dept Life & Environm Sci, Via Brecce Bianche, I-60131 Ancona, Italy.	a.annibaldi@univpm.it	Illuminati, Silvia/T-7873-2019; Illuminati, Silvia/GXZ-5038-2022; Scarponi, Giuseppe/AAQ-6394-2021	Illuminati, Silvia/0000-0001-6465-5477; Scarponi, Giuseppe/0000-0003-2932-0596	Universita Politecnica delle Marche	Universita Politecnica delle Marche	Financial support was obtained from the Universita Politecnica delle Marche under university funding for scientific research Ricerca Scientifica di Ateneo and is gratefully acknowledged. Many thanks are due to Dr. Trognoni (Acqua Roana), Dr. Mariani (Acqua Nerea), and Carlo Ercoli for providing water samples from their factories and houses and for technical support on-site.		49	3	4	0	19	INT ASSOC FOOD PROTECTION	DES MOINES	6200 AURORA AVE SUITE 200W, DES MOINES, IA 50322-2863 USA	0362-028X	1944-9097		J FOOD PROTECT	J. Food Prot.	FEB	2018	81	2
J	Martarelli, L; Iacuitto, M; Gregori, V; Menotti, RM; Petitta, M; Scalise, AR				Martarelli, Lucio; Iacuitto, Marcello; Gregori, Vincenzo; Menotti, Riccardo Massimiliano; Petitta, Marco; Scalise, Anna Rosa			The Rieti Land Reclamation Authority relevance in the management of surface waters for the irrigation purposes of the Rieti Plain (Central Italy)	ACQUE SOTTERRANEE-ITALIAN JOURNAL OF GROUNDWATER			English	Article						Rieti Land Reclamation Authority; surface water management; irrigation; hydrogeology; Rieti Plain		The Rieti Plain is crowned by calcareous-marly reliefs (Rieti and Sabini Mountains) and represents an intra-Apennine Plio-Quaternary alluvial and fluvial-lacustrine basin formed after multi-stage extensional tectonic processes. This territory presents huge amounts of water resources (Velino and Turano rivers; several springs; Lungo and Ripasottile lakes, relics of ancient Lacus Velinus). The aqui…	[Martarelli, Lucio; Scalise, Anna Rosa] Geol Survey Italy, Italian Natl Inst Environm Protect & Res, Via Vitaliano Brancati 48, I-00144 Rome, Italy; [Iacuitto, Marcello; Gregori, Vincenzo] Rieti Land Reclamat Author, Via Orchidee 20, I-02100 Rieti, Italy; [Menotti, Riccardo Massimiliano] IFAC CNR, Via Madonna del Piano 10, I-50019 Florence, Italy; [Petitta, Marco] Sapienza Univ Rome, Earth Sci De…	Italian Institute for Environmental Protection & Research (ISPRA); Consiglio Nazionale delle Ricerche (CNR); Istituto di Fisica Applicata Nello Carrara (IFAC-CNR); Sapienza University Rome	Martarelli, L (corresponding author), Geol Survey Italy, Italian Natl Inst Environm Protect & Res, Via Vitaliano Brancati 48, I-00144 Rome, Italy.	lucio.martarelli@isprambiente.it	Petitta, Marco/D-3848-2009	Petitta, Marco/0000-0003-1137-6137					15	0	0	0	3	PAGEPRESS PUBL	PAVIA	MEDITGROUP, VIA G BELLI, 4, PAVIA, 27100, ITALY	1828-454X			ACQUE SOTTER	Acque Sotter.		2016	5	2	2
C	Sappa, G; Ferranti, F; De Filippi, FM			SGEM	Sappa, Giuseppe; Ferranti, Flavia; De Filippi, Francesco Maria			HYDROGEOLOGICAL WATER BUDGET OF THE KARST AQUIFER FEEDING PERTUSO SPRING (CENTRAL ITALY)	16TH INTERNATIONAL MULTIDISCIPLINARY SCIENTIFIC GEOCONFERENCE, SGEM 2016: SCIENCE AND TECHNOLOGIES IN GEOLOGY, EXPLORATION AND MINING, VOL I	International Multidisciplinary Scientific GeoConference-SGEM		English	Proceedings Paper	16th International Multidisciplinary Scientific Geoconference (SGEM 2016)	JUN 30-JUL 06, 2016	Albena, BULGARIA	Bulgarian Acad Sci,Acad Sci Czech Republ,Latvian Acad Sci,Polish Acad Sci,Russian Acad Sci,Serbian Acad Sci & Arts,Slovak Acad Sci,Natl Acad Sci Ukraine,Inst Water Problem & Hydropower NAS KR,Natl Acad Sci Armenia,Sci Council Japan,World Acad Sci,European Acad Sci Arts & Lett,Acad Sci Moldova,Montenegrin Acad Sci & Arts,Croatian Acad Sci & Arts,Georgian Natl Acad Sci,Acad Fine Arts & Design Brati…		carbonatic karst aquifer; Pertuso Spring; inverse water balance; water budget; GIS	RECHARGE	The evaluation of the active recharge of karst aquifers is an important tool to estimate the groundwater resource availability in these complex hydrogeological systems, characterized by spatial and temporal variability of many hydrogeological factors, involved in groundwater flow. As a matter of fact, the rate of recharge is a key aspect for sustainable exploitation and management of these ground…	[Sappa, Giuseppe; Ferranti, Flavia; De Filippi, Francesco Maria] Sapienza Univ Rome, Dept Civil & Environm Engn, DICEA, Rome, Italy	Sapienza University Rome	Sappa, G (corresponding author), Sapienza Univ Rome, Dept Civil & Environm Engn, DICEA, Rome, Italy.			De Filippi, Francesco Maria/0000-0002-7204-880X					14	1	1	0	0	STEF92 TECHNOLOGY LTD	SOFIA	1 ANDREY LYAPCHEV BLVD, SOFIA, 1797, BULGARIA	1314-2704		978-619-7105-55-1	INT MULTI SCI GEOCO			2016
J	Amanzio, G; Marchionatti, F; Lavy, M; Ghione, R; De Maio, M				Amanzio, Gianpiero; Marchionatti, Federico; Lavy, Muriel; Ghione, Raffaella; De Maio, Marina			Springs monitoring data analysis with a frequency and time domain approach: the case study of Mascognaz spring (Aosta Valley)	GEAM-GEOINGEGNERIA AMBIENTALE E MINERARIA-GEAM-GEOENGINEERING ENVIRONMENT AND MINING			Italian	Article						mountain spring; time series analysis; porous media; Aosta Valley; spring monitoring	SPECTRAL-ANALYSES; HYDROGRAPHS	Aquifers in mountain areas are a strategic resource for people who live there. In fact, their proper management is strongly influenced by periods of high water stress, linked to tourism activity. In order to optimize future water management, it is fundamental to understand hydrogeological characteristics of these systems. Due to the lack of economic resources, these hydrogeological systems are in…	[Amanzio, Gianpiero; Marchionatti, Federico; Lavy, Muriel; Ghione, Raffaella; De Maio, Marina] Politecn Torino, DIATI, Turin, Italy	Polytechnic University of Turin	Amanzio, G (corresponding author), Politecn Torino, DIATI, Turin, Italy.								26	1	1	0	0	PATRON EDITORE S R L	BOLOGNA	VIA BADINI 12, QUARTO INFERIORE, BOLOGNA, 00000, ITALY	1121-9041			GEAM-GEOING AMBIENT	Geam-Geoint. Ambient. Min.	APR	2016		147
J	Casale, A; Saroli, M; Giovinco, G; Lancia, M; Albano, M; Zarlenga, F; Dell'Isola, M				Casale, Anna; Saroli, Michele; Giovinco, Gaspare; Lancia, Michele; Albano, Matteo; Zarlenga, Francesco; Dell'Isola, Marco			Hydrogeological study and numerical model of the Suio-Castelforte hydrothermal area (central Italy)	RENDICONTI ONLINE SOCIETA GEOLOGICA ITALIANA			English	Article						Aurunci Mts.; numerical analysis; Roccamonfina Volcano; thermal springs		A numerical simulation has been performed through the natural geothermal system of Suio-Castelforte (LT) in order to investigate the hydothermal area and assess its geothermal potentiality. Starting from geological and hydrogeological data a 2D conceptual model has been built. For numerical purpose, the latter idealizes and simplifies the natural system. The area has been affected by a temperatur…	[Casale, Anna; Saroli, Michele; Giovinco, Gaspare; Lancia, Michele; Albano, Matteo; Dell'Isola, Marco] Univ Cassino & Southern Lazio, Dept Civil & Mech Engn, Via G Di Biasio 43, I-03043 Cassino, Italy; [Albano, Matteo] Ist Nazl Geofis & Vulcanol, Via Vigna Murata 605, I-00143 Rome, Italy; [Zarlenga, Francesco] ENEA Casaccia Res Ctr, Tech Unit Renewable Energy Sources, Via Anguillarese 301, I-0012…	University of Cassino; Istituto Nazionale Geofisica e Vulcanologia (INGV); Italian National Agency New Technical Energy & Sustainable Economics Development	Casale, A (corresponding author), Univ Cassino & Southern Lazio, Dept Civil & Mech Engn, Via G Di Biasio 43, I-03043 Cassino, Italy.	a.casale@unicas.it	Saroli, Michele MS/F-5132-2017; Lancia, Michele/AAM-3275-2020; Albano, Matteo/K-3825-2017	Saroli, Michele MS/0000-0001-9499-3960; Albano, Matteo/0000-0003-2772-2401; Dell'Isola, Marco/0000-0001-7976-5484; Lancia, Michele/0000-0002-4862-5179					14	1	1	1	7	SOC GEOLOGICA ITALIANA	ROME	UNIV DEGLI STUDI LA SAPIENZA, DIPART SCI DELLA TERRA, PIAZZALE ALDO MORO 5, ROME, I-00185, ITALY	2035-8008			REND ONLINE SOC GEOL	Rend. Online Soc. Geol. Ital.	NOV	2016	41
J	Menichini, M; Da Prato, S; Doveri, M; Ellero, A; Lelli, M; Masetti, G; Nisi, B; Raco, B				Menichini, Matia; Da Prato, Simone; Doveri, Marco; Ellero, Alessandro; Lelli, Matteo; Masetti, Giulio; Nisi, Barbara; Raco, Brunella			An integrated methodology to define Protection Zones for groundwater-based drinking water sources: an example from the Tuscany Region, Italy	ACQUE SOTTERRANEE-ITALIAN JOURNAL OF GROUNDWATER			Italian	Article						protection zones; water for human consumption; groundwater management; conceptual hydrogeological model		Water is an essential economic and social resource. It is also finite and vulnerable. For Europe, this generally accepted understanding has been translated into the European and National Directive (2000/60/EC, D.Lgs. 152/2006). This law has led to an increased awareness of the role of the resource and its importance in the socioeconomic, cultural, and political realms. To protect this resource, s…	[Menichini, Matia; Da Prato, Simone; Doveri, Marco; Ellero, Alessandro; Lelli, Matteo; Masetti, Giulio; Nisi, Barbara; Raco, Brunella] CNR, IGG, Via Moruzzi 1, Pisa, Italy	Consiglio Nazionale delle Ricerche (CNR); Istituto di Geoscienze e Georisorse (IGG-CNR)	Menichini, M (corresponding author), CNR, IGG, Via Moruzzi 1, Pisa, Italy.	m.menichini@igg.cnr.it; simone.daprato@igg.cnr.it; doveri@igg.cnr.it; ellero@igg.cnr.it; m.lelli@igg.cnr.it; masetti@igg.cnr.it; b.nisi@igg.cnr.it; b.raco@igg.cnr.it	doveri, marco/A-1746-2018; Ellero, Alessandro/AAW-3162-2020; Raco, Brunella/AAX-8138-2020; Masetti, Giulio/AAX-7160-2020; Lelli, Matteo/AAX-2090-2020; Menichini, Matia/AAC-1765-2020; Nisi, Barbara/AAW-4894-2020	doveri, marco/0000-0002-7848-1225; Ellero, Alessandro/0000-0003-2826-6161; Masetti, Giulio/0000-0003-0355-3500; Raco, Brunella/0000-0002-0196-9855					23	5	5	0	3	PAGEPRESS PUBL	PAVIA	MEDITGROUP, VIA G BELLI, 4, PAVIA, 27100, ITALY	1828-454X			ACQUE SOTTER	Acque Sotter.		2015	4	1
J	Manna, F; Nimmo, JR; Allocca, V; De Vita, P				Manna, Ferdinando; Nimmo, John R.; Allocca, Vincenzo; De Vita, Pantaleone			Recharge in karst aquifers: from regional to local and annual to episodic scale	RENDICONTI ONLINE SOCIETA GEOLOGICA ITALIANA			English	Article						Groundwater recharge; karst aquifer; Water Table Fluctuation	GROUNDWATER RECHARGE	The assessment of groundwater recharge for karst aquifers of southern Italy is a major scientific task due to the relevant socio-economic and environmental role of the related groundwater resources. In this paper, the results of two methods, applied at different spatial and time scales, are reported. At regional and mean annual scales, through a multidisciplinary approach, the mean Annual Groudwa…	[Manna, Ferdinando; Allocca, Vincenzo; De Vita, Pantaleone] Univ Naples Federico II, Dept Earth Sci Environm & Resources, Naples, Italy; [Nimmo, John R.] US Geol Survey, Menlo Pk, CA 94025 USA	University of Naples Federico II; United States Department of the Interior; United States Geological Survey	Manna, F (corresponding author), Univ Naples Federico II, Dept Earth Sci Environm & Resources, Naples, Italy.	ferdinando.manna@unina.it	De Vita, Pantaleone/ABI-3797-2020; Manna, Ferdinando/D-4749-2018	De Vita, Pantaleone/0000-0002-0692-8630; Manna, Ferdinando/0000-0002-8176-4656; ALLOCCA, Vincenzo/0000-0001-7146-2438					15	2	2	0	7	SOC GEOLOGICA ITALIANA	ROME	UNIV DEGLI STUDI LA SAPIENZA, DIPART SCI DELLA TERRA, PIAZZALE ALDO MORO 5, ROME, I-00185, ITALY	2035-8008			REND ONLINE SOC GEOL	Rend. Online Soc. Geol. Ital.	APR	2015	35
J	Carlino, S; Somma, R; Troiano, A; Di Giuseppe, MG; Troise, C; De Natale, G				Carlino, S.; Somma, R.; Troiano, A.; Di Giuseppe, M. G.; Troise, C.; De Natale, G.			The geothermal system of Ischia Island (southern Italy): Critical review and sustainability analysis of geothermal resource for electricity generation	RENEWABLE ENERGY			English	Review						Ischia Island; Geothermal resource; Sustainable energy; Heat flow; Fluid advection; Brittle-ductile transition	THERMAL WATERS; HYDROTHERMAL SYSTEMS; CALDERA RESURGENCE; GROUND DEFORMATION; FLUID MIGRATION; VOLCANIC ISLAND; HEAT-FLOW; MODEL; EVOLUTION; EVIDENCES	In this paper we analyze the main available data related to the geothermal system of Ischia Island, starting from the first geothermal exploration in 1939. Our aim is to define a conceptual model of the geothermal reservoir, according to geological, geochemical, geophysical and stratigraphic data. In recent times, the interest on geothermal exploitation for electricity generation in Italy is rapi…	[Carlino, S.; Somma, R.; Troiano, A.; Di Giuseppe, M. G.; Troise, C.; De Natale, G.] Ist Nazl Geofis & Vulcanol, Sez Napoli, Osservatorio Vesuviano, I-80124 Naples, Italy	Istituto Nazionale Geofisica e Vulcanologia (INGV)	Carlino, S (corresponding author), Ist Nazl Geofis & Vulcanol, Sez Napoli, Osservatorio Vesuviano, Via Diocleziano 328, I-80124 Naples, Italy.	stefano.carlino@ov.ingv.it	Troiano, Antonio/M-3347-2014; De Natale, Giuseppe/M-6763-2016; Carlino, Stefano/C-9538-2015; Di Giuseppe, Maria Giulia/AAX-4460-2021; Somma, Renato/G-5976-2014; Troise, Claudia/F-8329-2014	Troiano, Antonio/0000-0001-9071-0900; Carlino, Stefano/0000-0002-3924-3881; Somma, Renato/0000-0002-2227-6054; Troise, Claudia/0000-0001-6555-5777; Di Giuseppe, Maria Giulia/0000-0003-4573-131X; DE NATALE, Giuseppe/0000-0001-8391-2846	ICDP Campi Flegrei Deep Drilling Project CFDDP; PON-MON.I.C.A. project	ICDP Campi Flegrei Deep Drilling Project CFDDP; PON-MON.I.C.A. project	We are grateful to the Editor in Chief Dr. A.A.M. Sayigh for editorial handling and to the anonymous Referees for helpful comments and suggestions. We also would like to thank Dr. R. Isaia, Dr. E. Iannuzzi and Dr. R.M. Toccaceli for their support in providing geological and drillings data. This study has been funded by ICDP Campi Flegrei Deep Drilling Project CFDDP and by PON-MON.I.C.A. project.		81	48	50	0	71	PERGAMON-ELSEVIER SCIENCE LTD	OXFORD	THE BOULEVARD, LANGFORD LANE, KIDLINGTON, OXFORD OX5 1GB, ENGLAND	0960-1481			RENEW ENERG	Renew. Energy	FEB	2014	62
J	De Luca, DA; Destefanis, E; Forno, MG; Lasagna, M; Masciocco, L				De Luca, D. A.; Destefanis, E.; Forno, M. G.; Lasagna, Manuela; Masciocco, L.			The genesis and the hydrogeological features of the Turin Po Plain fontanili, typical lowland springs in Northern Italy	BULLETIN OF ENGINEERING GEOLOGY AND THE ENVIRONMENT			English	Article						Lowland springs (fontanili); Lithostratigraphy; Hydrogeology and water quality; Po River Plain	GROUNDWATER	The fontanili are typical lowland springs that occur in Northern Italy along the transition zone from high to low plain (the fontanili line), due to changes in both the slope surface and the sediment grain size. These resurgences of phreatic water were investigated in the western sector of the Po Plain in the Turin Province. Although the available bibliographic data through 2005 reveal the occurr…	[De Luca, D. A.; Destefanis, E.; Forno, M. G.; Lasagna, Manuela; Masciocco, L.] Univ Turin, Dept Earth Sci, Via Valperga Caluso 35, I-10125 Turin, Italy	University of Turin	Lasagna, M (corresponding author), Univ Turin, Dept Earth Sci, Via Valperga Caluso 35, I-10125 Turin, Italy.	manuela.lasagna@unito.it	Forno, M. Gabriella/AAJ-7140-2021; Lasagna, Manuela/H-5502-2019; De+Luca, Domenico/ABD-7235-2020	Lasagna, Manuela/0000-0003-3464-2370; DESTEFANIS, Enrico/0000-0001-7106-7382; Forno, M. Gabriella/0000-0002-1482-3388					45	50	51	0	22	SPRINGER HEIDELBERG	HEIDELBERG	TIERGARTENSTRASSE 17, D-69121 HEIDELBERG, GERMANY	1435-9529	1435-9537		B ENG GEOL ENVIRON	Bull. Eng. Geol. Environ.	MAY	2014	73	2
J	De Feo, G; Ribera, F; Abbondandolo, S; De Gisi, S				De Feo, G.; Ribera, F.; Abbondandolo, S.; De Gisi, S.			What lessons can be learnt from studying a Roman hydraulic structure in a little village in Southern Italy?	WATER SCIENCE AND TECHNOLOGY-WATER SUPPLY			English	Article						cisterns; fountains; galleries; Roman; sustainability		The aim of this paper is to study a Roman hydraulic structure in a little village in Southern Italy in order to learn some lessons from the past and identify potential ideas for implementation. Despite increasing global urbanization a significant percentage of people inhabiting inland areas need critical infrastructure service including water supply systems. The fountain system under consideratio…	[De Feo, G.] Univ Salerno, Dept Ind Engn, I-84084 Fisciano, SA, Italy; [Ribera, F.] Univ Salerno, Dept Civil Engn, I-84084 Fisciano, SA, Italy	University of Salerno; University of Salerno	De Feo, G (corresponding author), Univ Salerno, Dept Ind Engn, Via Ponte don Melillo, I-84084 Fisciano, SA, Italy.	g.defeo@unisa.it	De Feo, Giovanni/J-7435-2012; De Gisi, Sabino/H-6081-2019	De Feo, Giovanni/0000-0002-0696-0569; De Gisi, Sabino/0000-0001-7264-4241; RIBERA, Federica/0000-0002-9349-1093					9	0	0	0	5	IWA PUBLISHING	LONDON	ALLIANCE HOUSE, 12 CAXTON ST, LONDON SW1H0QS, ENGLAND	1606-9749			WATER SCI TECH-W SUP	Water Sci. Technol.-Water Supply		2013	13	3
J	Desiderio, G; D'arcevia, CFV; Nanni, T; Rusi, S				Desiderio, Giovanni; D'arcevia, Clemente Folchi Vici; Nanni, Torquato; Rusi, Sergio			Hydrogeological mapping of the highly anthropogenically influenced Peligna Valley intramontane basin (Central Italy)	JOURNAL OF MAPS			English	Article						hydrogeological cartography; hydrodynamics; hydrochemistry; intramontane plain; aquifer vulnerability; potential and real pollution sources; Peligna Valley; Central Italy		This paper presents hydrogeological mapping of the Peligna Valley (Central Italy) intramontane basin. The basin is hydrogeologically complex due to the significant surface and underground water resources which are extensively used for potable, industrial, agricultural and healing purposes. The basin history is characterised by significant fluvio-lacustrine deposition whose thickness can reach as …	[Desiderio, Giovanni; Rusi, Sergio] Gabriele dAnnunzio Univ, Dept Ingn & Geol, Chieti, Italy; [D'arcevia, Clemente Folchi Vici; Nanni, Torquato] Polytech Univ Marche, Dept Sci & Ingn Mat Ambiente & Urbanist, Ancona, Italy	G d'Annunzio University of Chieti-Pescara; Marche Polytechnic University	Rusi, S (corresponding author), Gabriele dAnnunzio Univ, Dept Ingn & Geol, Chieti, Italy.	s.rusi@unich.it	Rusi, Sergio/O-6138-2017	Rusi, Sergio/0000-0003-0512-5614					14	15	15	0	17	TAYLOR & FRANCIS LTD	ABINGDON	2-4 PARK SQUARE, MILTON PARK, ABINGDON OR14 4RN, OXON, ENGLAND	1744-5647			J MAPS	J. Maps		2012	8	2
J	Rugani, B; Pulselli, RM; Niccolucci, V; Bastianoni, S				Rugani, B.; Pulselli, R. M.; Niccolucci, V.; Bastianoni, S.			Environmental performance of a XIV Century water management system: An emergy evaluation of cultural heritage	RESOURCES CONSERVATION AND RECYCLING			English	Article						Bottini; Cultural heritage; Emergy; Environmental accounting; Water management	SUSTAINABILITY; TRANSFORMITY; PROVINCE; SIENA	In the late Middle Ages, the city of Siena (Italy) had a high population density and had to face the problem of supplying water within the city walls for housing, crafts, economic and commercial activities, as well as for the risk of fire. A network of underground drifts, namely Bottini, was then built, achieving a total length of about 25 km in the late XIV Century. The Bottini have been capturi…	[Rugani, B.; Pulselli, R. M.; Niccolucci, V.; Bastianoni, S.] Univ Siena, Dept Chem, Ecodynam Grp, I-53100 Siena, Italy; [Rugani, B.; Niccolucci, V.] La Diana Assoc, I-53100 Siena, Italy	University of Siena	Niccolucci, V (corresponding author), Univ Siena, Dept Chem, Ecodynam Grp, Via Diana 2A, I-53100 Siena, Italy.	valentina.niccolucci@unisi.it	Bastianoni, Simone/K-6721-2015; RUGANI, Benedetto/C-4498-2012; Niccolucci, Valentina/L-5510-2015; Rugani, Benedetto/E-8074-2017	Bastianoni, Simone/0000-0002-6470-7377; Niccolucci, Valentina/0000-0002-4484-9263; Rugani, Benedetto/0000-0002-3525-1382; Pulselli, Riccardo Maria/0000-0001-8340-4040					37	11	12	2	37	ELSEVIER SCIENCE BV	AMSTERDAM	PO BOX 211, 1000 AE AMSTERDAM, NETHERLANDS	0921-3449			RESOUR CONSERV RECY	Resour. Conserv. Recycl.	NOV	2011	56	1
C	Pulselli, RM; Rugani, B; Tiezzi, E; Marchettini, N		Hernandez, S; Brebbia, CA; DeWilde, WP		Pulselli, R. M.; Rugani, B.; Tiezzi, E.; Marchettini, N.			An emergy evaluation of a medieval water management system: the case of the underground Bottini in Siena (Italy)	ECO-ARCHITECTURE III: HARMONISATION BETWEEN ARCHITECTURE AND NATURE	WIT Transactions on Ecology and the Environment		English	Proceedings Paper	3rd International Conference on Harmonisation between Architecture and Nature	APR 12-14, 2010	A Coruna, SPAIN	Wessex Inst Technol,WIT Transact Ecol & Environm		cultural heritage; energy systems diagrams; water management		In the middle ages, Siena had a high population density and had to face the problem of water supply within the city walls for housing, crafts, industrial activities and fire risks. With this aim, a series of underground drifts, namely Bottini, was built at the beginning of the 13th century and achieved a total length of 25 km in the 14th century. Bottini have been capturing rain water and conduct…	[Pulselli, R. M.; Rugani, B.; Tiezzi, E.; Marchettini, N.] Univ Siena, Dept Chem, Ecodynam Grp, I-53100 Siena, Italy	University of Siena			Marchettini, Nadia/N-2281-2015; Rugani, Benedetto/E-8074-2017	Marchettini, Nadia/0000-0002-2631-9306; Rugani, Benedetto/0000-0002-3525-1382; Pulselli, Riccardo Maria/0000-0001-8340-4040					12	1	1	1	12	WIT PRESS	SOUTHAMPTON	ASHURST LODGE, SOUTHAMPTON SO40 7AA, ASHURST, ENGLAND	1743-3541		978-1-84564-430-7	WIT TRANS ECOL ENVIR	WIT Trans. Ecol. Environ.		2010	128
C	Aringoli, D; Farabollini, P; Gentili, B; Materazzi, M; Pambianchi, G		DeDapper, M; Vermeulen, F; Deprez, S; Taelman, D		Aringoli, D.; Farabollini, P.; Gentili, B.; Materazzi, M.; Pambianchi, G.			GEOMORPHOLOGICAL EVIDENCES OF NATURAL DISASTERS IN THE ROMAN ARCHAEOLOGICAL SITE OF CARSULAE (TIBER BASIN - CENTRAL ITALY)	OL' MAN RIVER: GEO-ARCHAELOGICAL ASPECTS OF RIVERS AND RIVER PLAINS	Archaeological Reports Ghent University		English	Proceedings Paper	Meeting on Ol'Man River - Geo-Archaelogical Aspects of Rivers and River Plains	SEP 22-24, 2006	Gent, BELGIUM			Geo-archaeology; Travertine; Karst processes; Mass movements; Carsulae; Italy	TRAVERTINES; MORPHOLOGY; APENNINES; TURKEY	The Roman town of Carsulae was founded after the construction of the Flaminia Road, whose track was studied by Caius Flaminius between 220 and the 219 BCE (Before Common Era). The road was realized with the aim to connect Rome with the Adriatic coast. Probably arisen from the union of several communities, the importance of Carsulae, testified since the Ist century BCE by Strabo, Pliny the Younger…	[Aringoli, D.; Farabollini, P.; Gentili, B.; Materazzi, M.; Pambianchi, G.] Univ Camerino, Dipartimento Sci Terra, I-62032 Camerino, Italy	University of Camerino		Domenico.Aringoli@unicam.it; piero.farabollini@unicam.it; Bernardino.Gentili@unicam.it; marco.materazzi@unicam.it; gilberto.pambianchi@unicam.it	MATERAZZI, Marco/AAW-9303-2020; Aringoli, Domenico/C-1159-2013	MATERAZZI, Marco/0000-0002-9480-5680;					33	3	3	0	3	ACADEMIA PRESS	GHENT	GHENT, BELGIUM			978-90-382-1404-7	ARCHAEOL REP GHENT			2009	5
B	Naclerio, G; Celico, F		Meijer, D; DeJong, F		Naclerio, Gino; Celico, Fulvio			SPRING PROTECTION AGAINST MICROBIAL CONTAMINATION IN COMPARTMENTALIZED CARBONATE AQUIFERS, CENTRAL-SOUTHERN ITALY	ENVIRONMENTAL REGULATION: EVALUATION, COMPLIANCE AND ECONOMIC IMPACT	Environmental Health Physical Chemical and Biological Factors		English	Article; Book Chapter							DRASTIC-BASED METHOD; LIMESTONE AQUIFERS; GROUNDWATER; POLLUTION; BEHAVIOR; EPIKARST; TOPSOIL	Recent researches in central-southern Italy demonstrated that carbonate aquifers may behave as compartmentalized systems, due to the barrier action of some low-permeability fault zones that partially impede groundwater flow. This conceptual model is different from models generally applied in karst aquifers where faults act as drains, due to their enhanced hydraulic conductivity. Due to this disco…	[Naclerio, Gino; Celico, Fulvio] Univ Molise, Groundwater Res Ctr, I-86090 Pesche, IS, Italy	University of Molise	Naclerio, G (corresponding author), Univ Molise, Groundwater Res Ctr, I-86090 Pesche, IS, Italy.	naclerio@unimol.it; celico@unimol.it	Celico, Fulvio/A-5043-2008; Naclerio, Gino/A-5692-2008	NACLERIO, GINO/0000-0001-7489-4455					14	0	0	0	2	NOVA SCIENCE PUBLISHERS, INC	HAUPPAUGE	400 OSER AVE, STE 1600, HAUPPAUGE, NY 11788-3635 USA			978-1-60741-645-6	ENV HEALTH PHYS CHEM			2009
J	Civita, MV				Civita, Massimo V.			An improved method for delineating source protection zones for karst springs based on analysis of recession curve data	HYDROGEOLOGY JOURNAL			English	Article						groundwater protection zones; karst; recession curve; analytical solutions; Italy		A standard method for delineating source protection zones, particularly for karst and carbonate springs, has been improved. The method, based on recession curve analysis, defines four vulnerability scenarios with an evaluation of the appropriate dimensions of the protection areas, accommodating situations where field-test data are not available. The new approach makes it easier to separate the co…	Politecn Torino, Fac Engn 1, Dept Territorial & Environm Engn & Geotechnol DIT, Turin, Italy	Polytechnic University of Turin	Civita, MV (corresponding author), Politecn Torino, Fac Engn 1, Dept Territorial & Environm Engn & Geotechnol DIT, Turin, Italy.	massimo.civita@polito.it							35	33	37	0	21	SPRINGER	NEW YORK	233 SPRING ST, NEW YORK, NY 10013 USA	1431-2174			HYDROGEOL J	Hydrogeol. J.	AUG	2008	16	5
C	Gandin, A; Capezzuoli, E; Ciacci, A		Maggetti, M; Messiga, B		Gandin, A.; Capezzuoli, E.; Ciacci, A.			The stone of the inscribed Etruscan stelae from the Valdelsa area (Siena, Italy)	GEOMATERIALS IN CULTURAL HERITAGE	Geological Society Special Publication		English	Proceedings Paper	Symposium on Geomaterials in Cultural Heritage held at the 32nd International Geological Congress	AUG 20-28, 2004	Florence, ITALY				TRAVERTINE DEPOSITS; GEOLOGICAL RECORD; RAPOLANO TERME; CARBONATES; FACIES; TUFAS	The results of an archacometric study on five inscribed Etruscan funerary stelae, produced during the second half of the sixth century BC, in the Valdelsa area (NW of Siena, Italy), are reported. The style of the inscriptions suggests the presence of a local culture and a common language. The stone used to make the stelae is a laminated limestone consisting of the alternation of more or less comp…	[Gandin, A.; Capezzuoli, E.] Univ Siena, Dipartimento Sci Terra, I-53100 Siena, Italy; [Ciacci, A.] Univ Siena, Dipartimento Archeol & Storia Arti, I-53100 Siena, Italy	University of Siena; University of Siena	Gandin, A (corresponding author), Univ Siena, Dipartimento Sci Terra, I-53100 Siena, Italy.	gandin@unisi.it	Capezzuoli, Enrico/A-8915-2015	Capezzuoli, Enrico/0000-0002-4199-1870					37	1	1	0	1	GEOLOGICAL SOC PUBLISHING HOUSE	BATH	UNIT 7, BRASSMILL ENTERPRISE CTR, BRASSMILL LANE, BATH BA1 3JN, AVON, ENGLAND	0305-8719		1-86239-195-5	GEOL SOC SPEC PUBL	Geol. Soc. Spec. Publ.		2006	257
J	Di Gioia, ML; Leggio, A; Le Pera, A; Liquori, A; Perri, F				Di Gioia, M. L.; Leggio, A.; Le Pera, A.; Liquori, A.; Perri, F.			Occurrence of organic compounds in the thermal sulfurous waters of Calabria, Italy	CHROMATOGRAPHIA			English	Article						gas chromatography-mass spectrometry; solid-phase microextraction; polysulfide anions; thermal waters; diazomethane	SOLID-PHASE MICROEXTRACTION; CAMPI-FLEGREI CALDERA; FATTY-ACIDS; ORIGIN; LIPIDS; EVOLUTION; SPRINGS; NAPLES; FIELDS; CARBON	Sulfurous waters are certainly a substantial asset of the Calabria Region of Italy. They can be regarded as worth developing because of their human health implications and, if thermal tourism is promoted, their importance to the local economy. Because the effects of thermal waters on human health are not yet completely known and understood, it would be of interest to identify organic compounds re…	Univ Calabria, Dipartimento Sci Farmaceut, I-87036 Arcavacata Di Rende, CS, Italy	University of Calabria	Liquori, A (corresponding author), Univ Calabria, Dipartimento Sci Farmaceut, Via Ponte P Bucci,Cubo 15-C, I-87036 Arcavacata Di Rende, CS, Italy.	a.liguori@unical.it	Di Gioia, Maria Luisa/I-5830-2019; Le Pera, Adolfo/AAD-5527-2022	Di Gioia, Maria Luisa/0000-0001-5469-5459; Le Pera, Adolfo/0000-0003-3342-390X; Liguori, Angelo/0000-0003-4483-2506; Leggio, Antonella/0000-0002-4373-6232					32	9	9	0	6	VIEWEG	WIESBADEN	ABRAHAM-LINCOLN-STRABE 46, POSTFACH 15 47, D-65005 WIESBADEN, GERMANY	0009-5893			CHROMATOGRAPHIA	Chromatographia	JUN	2006	63	11-12
J	Boschetti, T; Venturelli, G; Toscani, L; Barbieri, M; Mucchino, C				Boschetti, T; Venturelli, G; Toscani, L; Barbieri, M; Mucchino, C			The Bagni di Lucca thermal waters (Tuscany, Italy):: an example of Ca-SO4 waters with high Na/Cl and low Ca/SO4 ratios	JOURNAL OF HYDROLOGY			English	Article						thermal waters; major and trace elements; oxygen; hydrogen; sulphur and strontium isotopes; Bagni di Lucca; Italy	NORTHERN APENNINES; ISOTOPIC COMPOSITION; GEOCHEMISTRY; EQUILIBRIA; EVENTS	The Bagm di Lucca thermal waters (Lucca province, Tuscany, Italy) have been well known since the Middle Age for their alleged curative properties. In the present work, the waters have been analysed for major and trace components and for 0, H, S and Sr isotopes. The 62 H and 8180 values indicate a meteoric origin of the waters and the tritium content suggests long-term (more than 40 years) circula…	Univ Parma, Dept Earth Sci, I-43100 Parma, Italy; Univ Roma La Sapienza, Dept Earth Sci, I-00185 Rome, Italy; Univ Parma, Dept Inorgan Chem Analyt Chem & Phys Chem, I-43100 Parma, Italy	University of Parma; Sapienza University Rome; University of Parma	Venturelli, G (corresponding author), Univ Parma, Dept Earth Sci, Parco Area Sci, I-43100 Parma, Italy.	gvt@unipr.it	Toscani, Lorenzo/G-6371-2012; Barbieri, Maurizio/E-9260-2012; Boschetti, Tiziano/F-8446-2011	Toscani, Lorenzo/0000-0001-5422-3507; Barbieri, Maurizio/0000-0002-6595-103X; Boschetti, Tiziano/0000-0002-5994-9750					73	60	60	2	10	ELSEVIER SCIENCE BV	AMSTERDAM	PO BOX 211, 1000 AE AMSTERDAM, NETHERLANDS	0022-1694	1879-2707		J HYDROL	J. Hydrol.	JUN 9	2005	307	1-4
J	Kucher, M				Kucher, M			The use of water and its regulation in medieval Siena	JOURNAL OF URBAN HISTORY			English	Article						water supply; fountains; Italy; infrastructure; laws		The Tuscan hill town of Siena, Italy, has been supplied by a system of gravity-fed fountains since at least the twelfth century. Medieval statutes and surviving physical evidence reveal that the city maintained the purity of its urban water supply by a combination of physical and legal structures. The urban water supply embodied the provisions of that legislation in the physical arrangements of t…	Univ Washington, Tacoma, WA USA	University of Washington; University of Washington Tacoma	Kucher, M (corresponding author), Univ Washington, Tacoma, WA USA.								57	14	19	0	7	SAGE PUBLICATIONS INC	THOUSAND OAKS	2455 TELLER RD, THOUSAND OAKS, CA 91320 USA	0096-1442			J URBAN HIST	J. Urban Hist.	MAY	2005	31	4
J	Crouch, DP				Crouch, DP			Environmental geology of ancient Greek cities	ENVIRONMENTAL GEOLOGY			English	Article						Greco-Roman cities; urban location; karst geology; colonization		Man-environment relations in the ancient Greek world, as now, were complex interactions. To understand them, we need to study a range of physical features and man's impact on the setting. The underlying geological reality of this area is karst, which is widely distributed, dominating Greece, the southern half of Turkey, and southern Italy and Sicily, where the Greco-Roman cities that we study wer…			Crouch, DP (corresponding author), RENSSELAER POLYTECH INST,SCH ARCHITECTURE,739 YALE ST 6B,SANTA PAULA,CA 93060, USA.								61	10	10	0	11	SPRINGER VERLAG	NEW YORK	175 FIFTH AVE, NEW YORK, NY 10010	0177-5146			ENVIRON GEOL	Environ. Geol.	APR	1996	27	3
J	Bono, P; Boni, C				Bono, P; Boni, C			Mineral waters in Italy	ENVIRONMENTAL GEOLOGY			English	Article						mineral waters; spas; water resources; Italy		The use of spring water as a drinking, therapeutic, and ornamental resource has historical origins that date back to the Romans. The most ancient regulations on ''mineral waters'' had been enacted in Italy long before the union (1870).			Bono, P (corresponding author), UNIV ROMA LA SAPIENZA,CNR,DIPARTIMENTO SCI TERRA,PIAZZALE ALDO MORO 5,I-00185 ROME,ITALY.								0	2	2	0	2	SPRINGER VERLAG	NEW YORK	175 FIFTH AVE, NEW YORK, NY 10010	0177-5146			ENVIRON GEOL	Environ. Geol.	MAR	1996	27	2
43
[truncated: 22 more columns]

## Sheet: Greece
Publication Type	Authors	Book Authors	Book Editors	Book Group Authors	Author Full Names	Book Author Full Names	Group Authors	Article Title	Source Title	Book Series Title	Book Series Subtitle	Language	Document Type	Conference Title	Conference Date	Conference Location	Conference Sponsor	Conference Host	Author Keywords	Keywords Plus	Abstract	Addresses	Affiliations	Reprint Addresses	Email Addresses	Researcher Ids	ORCIDs	Funding Orgs	Funding Name Preferred	Funding Text	Cited References	Cited Reference Count	Times Cited, WoS Core	Times Cited, All Databases	180 Day Usage Count	Since 2013 Usage Count	Publisher	Publisher City	Publisher Address	ISSN	eISSN	ISBN	Journal Abbreviation	Journal ISO Abbreviation	Publication Date	Publication Year	Volume	Issue	Part Number
J	Voudouris, K; Yapijakis, C; Georgaki, MN; Angelakis, AN				Voudouris, K.; Yapijakis, C.; Georgaki, M. -N; Angelakis, A. N.			Historical issues of hydrotherapy in thermal-mineral springs of the Hellenic world	SUSTAINABLE WATER RESOURCES MANAGEMENT			English	Article						Asclepieia; Balneotherapy; Classical and Hellenistic periods; Medicine; Water	WATER; AQUEDUCTS; GREECE; ORIGIN	Many springs have been recorded in Greece; some of them are characterized as thermo-mineral springs and are associated with their position between Eurasia and Africa, the volcanic activity, and the presence of tectonic faults. The therapeutic use of water (hydrotherapy) has been recorded in ancient Greece since at least 1000 BC. Asclepius was the god of medicine in ancient Greek religion and prie…	[Voudouris, K.; Georgaki, M. -N] Aristotle Univ Thessaloniki AUTh, Sch Geol, Lab Engn Geol & Hydrogeol, Thessaloniki 54124, Greece; [Voudouris, K.] AUTh, UNESCO Ctr Integrated & Multidisciplinary Water Re, Thessaloniki, Greece; [Yapijakis, C.] Natl Kapodistrian Univ Athens, Sch Med, Dept Pediat 1, Aghia Sophia Childrens Hosp, Thivon 1, Athens 11527, Greece; [Yapijakis, C.] Univ Res Inst Maternal …	Aristotle University of Thessaloniki; Aristotle University of Thessaloniki; National & Kapodistrian University of Athens; Athens Medical School; The Aghia Sophia Children's Hospital	Voudouris, K (corresponding author), Aristotle Univ Thessaloniki AUTh, Sch Geol, Lab Engn Geol & Hydrogeol, Thessaloniki 54124, Greece.;Voudouris, K (corresponding author), AUTh, UNESCO Ctr Integrated & Multidisciplinary Water Re, Thessaloniki, Greece.	kvoudour@geo.auth.gr; cyapi@med.uoa.gr; angelak@edeya.gr		Voudouris, Konstantinos/0000-0002-5409-1740; GEORGAKI, MARIA NEFELI/0000-0002-1829-4735	HEAL-Link Greece	HEAL-Link Greece	Open access funding provided by HEAL-Link Greece. This research received no external funding.		48	0	0	1	2	SPRINGER INT PUBL AG	CHAM	GEWERBESTRASSE 11, CHAM, CH-6330, SWITZERLAND	2363-5037	2363-5045		SUST WAT RESOUR MAN	Sustain. Wat. Resour. Manag.	FEB	2023	9	1
J	Zafeirakou, A; Karavi, A; Katsoulea, A; Zorpas, A; Papamichael, I				Zafeirakou, Antigoni; Karavi, Aristi; Katsoulea, Anastasia; Zorpas, Antonis; Papamichael, Iliana			Water resources management in the framework of the circular economy for touristic areas in the Mediterranean: case study of Sifnos Island in Greece	EURO-MEDITERRANEAN JOURNAL FOR ENVIRONMENTAL INTEGRATION			English	Article						Water resources management; Wastewater reuse; Touristic regions; Circular economy		The Aegean Islands Water District (WD 14), and more specifically the island of Sifnos, is facing many problems with water deficiency due to dry climatological conditions and population growth during the summer months, which is also reflected in its economy. As tourism is the main economic sector in coastal areas, managing water competently during the summer months is vital. In an effort to develo…	[Zafeirakou, Antigoni; Karavi, Aristi; Katsoulea, Anastasia] Aristotle Univ Thessaloniki, Dept Civil Engn, Div Hydraul & Environm Engn, Thessaloniki 54124, Greece; [Zorpas, Antonis; Papamichael, Iliana] Open Univ Cyprus, Fac Pure & Appl Sci, Lab Chem Engn & Engn Sustainabil, Latsia, Cyprus	Aristotle University of Thessaloniki; Open University of Cyprus	Zafeirakou, A (corresponding author), Aristotle Univ Thessaloniki, Dept Civil Engn, Div Hydraul & Environm Engn, Thessaloniki 54124, Greece.;Papamichael, I (corresponding author), Open Univ Cyprus, Fac Pure & Appl Sci, Lab Chem Engn & Engn Sustainabil, Latsia, Cyprus.	azafir@civil.auth.gr; karavi.aristi@gmail.com; Anakatsoulea@gmail.com; antoniszorpas@yahoo.com; iliana.papamichael@gmail.com	Katsoulea, Anastasia/HLW-5273-2023	Papamichael, Iliana/0000-0003-3564-2890					29	4	4	3	6	SPRINGER HEIDELBERG	HEIDELBERG	TIERGARTENSTRASSE 17, D-69121 HEIDELBERG, GERMANY	2365-6433	2365-7448		EURO-MEDITERR J ENVI	Euro-Mediterr. J. Environ. Integrat.	SEP	2022	7	3
J	Chatzis, K; Mahera, A; Mavrogonatou, G				Chatzis, Konstantinos; Mahera, Anna; Mavrogonatou, Georgia			Supplying the city of Ioannina with 'modern' waters, 1913-1940: the 'modern infrastructural ideal' in a mid-size Greek town	URBAN HISTORY			English	Article								A part of the Ottoman Empire for centuries, the city of Ioannina integrated into the Greek state following the Balkan wars of 1912-13. This article provides a first in-depth historical account of the city's water supply system from the early 1910s to the eve of World War II, and traces the path leading from a traditional system relying on private wells and public fountains to a modern water netwo…	[Chatzis, Konstantinos] 6&8 Ave Blaise Pascal, F-77455 Marne La Vallee, France; [Mahera, Anna] Univ Ioannina, GR-45110 Ioannina, Greece; [Mavrogonatou, Georgia] 9 Heroon Polytech Str, GR-15780 Zografos, Greece	University of Ioannina	Mavrogonatou, G (corresponding author), 9 Heroon Polytech Str, GR-15780 Zografos, Greece.	gmavr@central.ntua.gr		Mavrogonatou, Georgia/0000-0002-8284-4615					50	0	0	0	2	CAMBRIDGE UNIV PRESS	CAMBRIDGE	EDINBURGH BLDG, SHAFTESBURY RD, CB2 8RU CAMBRIDGE, ENGLAND	0963-9268	1469-8706		URBAN HIST	Urban Hist.	FEB	2021	48	1
J	Rogers, DK				Rogers, Dylan Kelby			Sensing Water in Roman Greece: The Villa of Herodes Atticus at Eva-Loukou and the Sanctuary of Demeter and Kore at Eleusis	AMERICAN JOURNAL OF ARCHAEOLOGY			English	Article							MEMORY	The water displays in Roman Greece in the villa of Herodes Atticus at Eva-Loukou and in the forecourt of the sanctuary of Demeter and Kore at Eleusis demonstrate diverse uses and contexts of flowing water. By focusing on the sensorial experience an ancient individual had with these structures, especially through the framework of a sensorial assemblage, we can highlight how sensory elements had th…	[Rogers, Dylan Kelby] Univ Virginia, Dept Art, Fayerweather Hall,POB 400130, Charlottesville, VA 22903 USA	University of Virginia	Rogers, DK (corresponding author), Univ Virginia, Dept Art, Fayerweather Hall,POB 400130, Charlottesville, VA 22903 USA.	dkr5t@virginia.edu							191	5	5	1	1	ARCHAEOLOGICAL INST AMERICA	BOSTON	656 BEACON STREET, BOSTON, MA 02215 USA	0002-9114	1939-828X		AM J ARCHAEOL	Am. J. Archaeol.	JAN	2021	125	1
J	Angelakis, AN; Voudouris, KS; Tchobanoglous, G				Angelakis, A. N.; Voudouris, K. S.; Tchobanoglous, G.			Evolution of water supplies in the Hellenic world focusing on water treatment and modern parallels	WATER SUPPLY			English	Article						ancient Greece; ancient hydraulic technologies; future trends; modern times; urban water systems; water treatment devices	WASTE-WATER; STORMWATER TECHNOLOGIES; MANAGEMENT; GREECE; HISTORY; SANITATION; RESOURCES; REUSE	Advanced, well organized, and operated urban water supply systems existed in Greece from the Bronze Age (ca. 3200-1100 BC). At the dawn of human history, surface water and groundwater, principally springs, were the most common water supply sources. As the population grew, periodic water shortages occurred. In Early Minoan times (ca. 3200-2100 BC), these water shortages led to the development of s…	[Angelakis, A. N.] HAO Demeter, Agr Res Inst Crete, Iraklion 71300, Greece; [Angelakis, A. N.] Union Hellen Water Supply & Sewerage Operators, Larisa 41222, Greece; [Voudouris, K. S.] Aristotle Univ Thessaloniki, Lab Engn Geol & Hydrogeol, Thessaloniki, Greece; [Tchobanoglous, G.] Univ Calif Davis, Dept Civil & Environm Engn, Davis, CA 95616 USA	Aristotle University of Thessaloniki; University of California System; University of California Davis	Voudouris, KS (corresponding author), Aristotle Univ Thessaloniki, Lab Engn Geol & Hydrogeol, Thessaloniki, Greece.	kvoudour@geo.auth.gr							54	8	8	2	23	IWA PUBLISHING	LONDON	ALLIANCE HOUSE, 12 CAXTON ST, LONDON SW1H0QS, ENGLAND	1606-9749	1607-0798		WATER SUPPLY	Water Supply	MAY	2020	20	3
J	Martín-Arias, J; Martínez-Santos, P; Andreo, B				Martin-Arias, Javier; Martinez-Santos, Pedro; Andreo, Bartolome			Modelling the effects of climate change and population growth in four intensively exploited Mediterranean aquifers. The Mijas range, southern Spain	JOURNAL OF ENVIRONMENTAL MANAGEMENT			English	Article						Groundwater model; Processing modflow; Climate change; Future scenarios; Karstic aquifer; Fisurated flow system	MANCHA OCCIDENTAL AQUIFER; GROUNDWATER RESOURCES; CARBONATE AQUIFERS; CHANGE IMPACTS; RECHARGE; BASIN; FLOW; VULNERABILITY; MANAGEMENT; DEMAND	Groundwater is key to economic growth in the Mediterranean region. This is particularly true of areas such as southern Spain, where aquifers underpin social development by supplying water to a booming tourist industry. Intensive groundwater use raises sustainability concerns, as pumping often exceeds the long-term recharge rate. Climate change and population growth are likely to exacerbate the wa…	[Martin-Arias, Javier; Andreo, Bartolome] Univ Malaga, Dept Geol, E-29071 Malaga, Spain; [Martin-Arias, Javier; Andreo, Bartolome] Univ Malaga, Ctr Hydrogeol Univ Malaga CEHIUMA, E-29071 Malaga, Spain; [Martinez-Santos, Pedro] Univ Complutense Madrid, Fac Geol Sci, Dept Geodynam Stratig & Palaeontol, UNESCO Chair Appropriate Technol Human Dev, E-28040 Madrid, Spain	Universidad de Malaga; Universidad de Malaga; Complutense University of Madrid	Martín-Arias, J (corresponding author), Univ Malaga CEHIUMA, Dept Geol, Malaga, Spain.;Martín-Arias, J (corresponding author), Univ Malaga CEHIUMA, Ctr Hydrogeol, Malaga, Spain.	j.martin@uma.es; pemartin@ucm.es; andreo@uma.es	martinez-santos, pedro/AFP-6982-2022	martinez-santos, pedro/0000-0003-2014-4063	University of Malaga [8.06/5.44.4100]; Ministerio de Economia y Empresas (MINECO) [CGL 2015-65858R]; Junta de Andalucia [RNM-308]	University of Malaga(University of Malaga); Ministerio de Economia y Empresas (MINECO); Junta de Andalucia(Junta de Andalucia)	This paper was funded under projects 8.06/5.44.4100 of the University of Malaga, CGL 2015-65858R of the Ministerio de Economia y Empresas (MINECO), and the Research Group RNM-308 of the Junta de Andalucia. The authors would also like to thank to water supply companies of Alhaurin de la Torre, Torremolinos and Benalm.adena, as well as the farmers and groundwater users of the Mijas range for their …		49	5	5	0	15	ACADEMIC PRESS LTD- ELSEVIER SCIENCE LTD	LONDON	24-28 OVAL RD, LONDON NW1 7DX, ENGLAND	0301-4797	1095-8630		J ENVIRON MANAGE	J. Environ. Manage.	MAY 15	2020	262
J	Walsh, K; Brown, AG; Gourley, B; Scaife, R				Walsh, K.; Brown, A. G.; Gourley, B.; Scaife, R.			Archaeology, hydrogeology and geomythology in the Stymphalos valley	JOURNAL OF ARCHAEOLOGICAL SCIENCE-REPORTS			English	Article						Mediterranean palaeoenvironment; Greece; Geoarchaeology; Hydrogeology; Mythology; Greek & Roman archaeology	SW TURKEY; GREECE; HOLOCENE; LAKE; VEGETATION; LANDSCAPE; CLIMATE; POLLEN; PELOPONNESE; SEDIMENTS	This paper uses the results of recent excavations of the city of Stymphalos and environmental studies on the floor of the Stymphalos polje to examine the role of both the lake and springs in the history of the classical city. Associated with Artemis and famed for Herakles' sixth labour ( killing of the Stymphalian birds), the city has a rich ( geo) mythology. While this narrative has been associa…	[Walsh, K.; Gourley, B.] Kings Manor Univ York, Dept Archaeol, York, N Yorkshire, England; [Walsh, K.; Gourley, B.] Aix Marseille Univ, IMeRA Inst Adv Study, Marseille, France; [Brown, A. G.; Scaife, R.] Univ Southampton, PLUS, Shackleton Bldg, Southampton SO17 1BJ, Hants, England	Aix-Marseille Universite; University of Southampton	Walsh, K (corresponding author), Kings Manor Univ York, Dept Archaeol, York, N Yorkshire, England.;Walsh, K (corresponding author), Aix Marseille Univ, IMeRA Inst Adv Study, Marseille, France.	kevin.walsh@york.ac.uk	Brown, Antony/G-4498-2014	Brown, Antony/0000-0002-1990-4654	British Academy [SG-50253]; University of York; University of Southampton	British Academy; University of York; University of Southampton	The authorsmust thank Lyn Ertl, MarkDover and Bob Smith for their cartographic assistance and Mike Charno for assistance in the field. The work was funded by the British Academy (SG-50253) and contributions from the Universities of York and Southampton. We would also like to thank the two referees for their pertinent and useful observations. This work was carried with the relevant permits from th…		74	8	8	0	10	ELSEVIER	AMSTERDAM	RADARWEG 29, 1043 NX AMSTERDAM, NETHERLANDS	2352-409X			J ARCHAEOL SCI-REP	J. Archaeol. Sci.-Rep.	OCT	2017	15
J	Christaki, M; Stournaras, G; Nastos, P; Mamasis, N				Christaki, M.; Stournaras, G.; Nastos, P.; Mamasis, N.			THE MAJESTIC HADRIANIC AQUEDUCT OF THE CITY OF ATHENS	GLOBAL NEST JOURNAL			English	Article						Hadrianic; aqueducts; tunnel; wells; groundwater; water resources	ANCIENT-GREECE; WATER	Athens in antiquity as well today, included all the settlements in the wider Attica region. That is why its official name was the Athens (plural). Since prehistoric times, the city of Athens and the wider region of Attica did not contain many natural water sources so aquatic reserves were never adequate to meet the needs of residents, as these changed through time. The construction of aqueducts w…	[Christaki, M.; Stournaras, G.] Univ Athens, Fac Geol & Geoenvironm, Dept Dynam Tecton Appl Geol, Panepistimiopolis 15784, Greece; [Nastos, P.] Univ Athens, Fac Geol & Geoenvironm, Dept Geog & Climatol, Panepistimiopolis 15784, Greece; [Mamasis, N.] Natl Tech Univ Athens, Sch Civil Engn, Dept Water Resources & Environm Engn, Iroon Polytech 5, Zografos 15780, Greece	National & Kapodistrian University of Athens; National & Kapodistrian University of Athens; National Technical University of Athens	Christaki, M (corresponding author), Univ Athens, Fac Geol & Geoenvironm, Dept Dynam Tecton Appl Geol, Panepistimiopolis 15784, Greece.	ritachristaki@yahoo.gr	Nastos, Panagiotis/Q-5419-2019; Nastos, Panagiotis T/E-7455-2015	Nastos, Panagiotis/0000-0001-9336-6586; Nastos, Panagiotis T/0000-0001-9336-6586					19	1	1	0	2	GLOBAL NETWORK ENVIRONMENTAL SCIENCE & TECHNOLOGY	ATHENS	30 VOULGAROKTONOU STR, ATHENS, GR 114 72, GREECE	1790-7632			GLOBAL NEST J	Glob. Nest. J.	SEP	2016	18	3
J	Angelakis, AN; Voudouris, KS; Mariolakos, I				Angelakis, Andreas N.; Voudouris, Konstantinos S.; Mariolakos, Ilias			Groundwater utilization through the centuries focusing οn the Hellenic civilizations	HYDROGEOLOGY JOURNAL			English	Article						Greece; Groundwater exploration; History of hydrogeology; Water supply; Wells	URBAN WATER; MINOAN; TECHNOLOGIES; AQUEDUCTS; GREECE; QANATS; CRETE	Groundwater has been utilized since the Prehistoric times. Water supply of some Minoan settlements on the eastern side of the island of Crete (Greece) was based on groundwater. Later on, many wells were constructed in several areas of Greece and their use expanded through subsequent periods. The greatest achievement in groundwater exploitation by ancient Greeks was the construction of long underg…	[Angelakis, Andreas N.] Natl Fdn Agr Res NAGREF, Inst Herakl, Iraklion 71307, Greece; [Voudouris, Konstantinos S.] Aristotle Univ Thessaloniki, Dept Geol, Lab Engn Geology& Hydrogeol, Thessaloniki 54124, Greece; [Mariolakos, Ilias] Univ Athens, Dept Geol, Athens, Greece	Aristotle University of Thessaloniki; National & Kapodistrian University of Athens	Voudouris, KS (corresponding author), Aristotle Univ Thessaloniki, Dept Geol, Lab Engn Geology& Hydrogeol, Thessaloniki 54124, Greece.	info@a-angelakis.gr; kvoudour@geo.auth.gr		Voudouris, Konstantinos/0000-0002-5409-1740					58	12	12	2	19	SPRINGER	NEW YORK	233 SPRING ST, NEW YORK, NY 10013 USA	1431-2174	1435-0157		HYDROGEOL J	Hydrogeol. J.	AUG	2016	24	5
J	Kallioras, A; Marinos, P				Kallioras, A.; Marinos, P.			Water resources assessment and management of karst aquifer systems in Greece	ENVIRONMENTAL EARTH SCIENCES			English	Article						Groundwater resources management; Karst aquifers; Water supply; Granular aquifers; Greece; Mediterranean	SEAWATER INTRUSION; EVROTAS RIVER; ARTIFICIAL RECHARGE; CONCEPTUAL-MODEL; GROUNDWATER; VULNERABILITY; QUALITY; BASIN; FRAMEWORK; SPRINGS	Groundwater resources of karst aquifers within Circum-Mediterranean are a vital natural resource, which have been exploited since the dawn of the Mediterranean civilization. In Greece, carbonate formations are thought to be one of the most important sources for various water uses, that are vital for the country's economy and development, that is agriculture and water supply. In most cases, they a…	[Kallioras, A.] Natl Tech Univ Athens, Sch Min & Met Engn, Athens, Greece; [Marinos, P.] Natl Tech Univ Athens, Sch Civil Engn, Athens, Greece	National Technical University of Athens; National Technical University of Athens	Marinos, P (corresponding author), Natl Tech Univ Athens, Sch Civil Engn, Athens, Greece.	marinos@central.ntua.gr	Kallioras, Andreas/AFA-2089-2022	Kallioras, Andreas/0000-0003-4661-297X					113	14	14	1	38	SPRINGER	NEW YORK	233 SPRING ST, NEW YORK, NY 10013 USA	1866-6280	1866-6299		ENVIRON EARTH SCI	Environ. Earth Sci.	JUL	2015	74	1
J	Voudouris, KS; Christodoulakos, Y; Steiakakis, E; Angelakis, AN				Voudouris, Konstantinos S.; Christodoulakos, Yiannis; Steiakakis, Emmanouil; Angelakis, Andreas N.			Hydrogeological Characteristics of Hellenic Aqueducts-Like Qanats	WATER			English	Review						aqueducts; Crete; foggara; Hellas; Polyrrhenia; qanat; Rhodes; Serres		In ancient Hellas, water management began in the early Minoan Era (ca. 3200-1100 BC) and was related to the geomorphology, the geology, the topography, and the local climatic, hydrological, and socio-political conditions. Historical and archaeological evidences show that ancient Greeks had developed even qanat-related technologies since the Classical times. During democratic periods, the focus of…	[Voudouris, Konstantinos S.] Aristotle Univ Thessaloniki, Sch Geol, Lab Engn Geol & Hydrogeol, GR-54124 Thessaloniki, Greece; [Christodoulakos, Yiannis] Minist Culture, Dept Antiqu 25, Khania 73134, Greece; [Steiakakis, Emmanouil] Tech Univ Crete, Mineral Resources Engn Dept, Khania 73134, Greece; [Angelakis, Andreas N.] Natl Agr Res Fdn, Inst Iraklion, Iraklion 71307, Greece; [Angelakis, Andreas…	Aristotle University of Thessaloniki; Technical University of Crete	Voudouris, KS (corresponding author), Aristotle Univ Thessaloniki, Sch Geol, Lab Engn Geol & Hydrogeol, GR-54124 Thessaloniki, Greece.	kvoudour@geo.auth.gr; gchkeepka@yahoo.gr; stiakaki@mred.tuc.gr; info@a-angelakis.gr		Voudouris, Konstantinos/0000-0002-5409-1740					33	29	29	0	27	MDPI AG	BASEL	POSTFACH, CH-4005 BASEL, SWITZERLAND	2073-4441			WATER-SUI	Water	SEP	2013	5	3
J	Katsanou, K; Siavalas, G; Lambrakis, N				Katsanou, K.; Siavalas, G.; Lambrakis, N.			The thermal and mineral springs of Aitoloakarnania Prefecture: function mechanism and origin of groundwater	ENVIRONMENTAL EARTH SCIENCES			English	Article						Alkaline waters; Trace elements; Fluoride; Residence time; Saturation indices	IONIAN ZONE; EVOLUTION; GREECE; AREA; GEOCHEMISTRY; STRATIGRAPHY; KINEMATICS; BEHAVIOR; ELEMENTS; NEOGENE	The study area is located in the northwestern part of Greece, in Aitoloakarnania prefecture. In this region, where no volcanic activity exists, thermal springs such as Kremasta and Kokkino Stefani, well-known for their healing properties occur. The objective of this study was the investigation of these springs, as well as the study of the chemical composition and origin of water. Relationships be…	[Katsanou, K.; Siavalas, G.; Lambrakis, N.] Univ Patras, Dept Geol, Rion 26504, Greece	University of Patras	Katsanou, K (corresponding author), Univ Patras, Dept Geol, Rion 26504, Greece.	katsanou@upatras.gr	Katsanou, Konstantina/AAF-8682-2020	Katsanou, Konstantina/0000-0003-2880-6244					57	7	7	0	17	SPRINGER	NEW YORK	ONE NEW YORK PLAZA, SUITE 4600, NEW YORK, NY, UNITED STATES	1866-6280	1866-6299		ENVIRON EARTH SCI	Environ. Earth Sci.	APR	2012	65	8
J	Frisone, F				Frisone, Flavia			Rivers, land organization, and identity in Greek Western Apoikiai	MEDITERRANEAN HISTORICAL REVIEW			English	Article						Greek colonization; landscape; river; waterways; fluvial valleys		The present article looks at the so-called 'archaic Greek colonization', and at the connection of the settlements with the territories they occupied, from the perspective of their relationship with water - the water of the sea, but mainly that of rivers and springs. The springs and, even more importantly, the rivers that traversed the places where the new Hellenic communities established themselv…	Univ Salento, Dipartimento Beni Culturali, Lecce, Italy	University of Salento	Frisone, F (corresponding author), Univ Salento, Dipartimento Beni Culturali, Lecce, Italy.	flavia.frisone@unisalento.it							99	1	1	0	6	ROUTLEDGE JOURNALS, TAYLOR & FRANCIS LTD	ABINGDON	2-4 PARK SQUARE, MILTON PARK, ABINGDON OX14 4RN, OXON, ENGLAND	0951-8967	1743-940X		MEDITERR HIST REV	Mediterr. Hist. Rev.		2012	27	1
J	Theodossiou, E; Katsiotis, M; Manimanis, VN; Mantarakis, P				Theodossiou, E.; Katsiotis, M.; Manimanis, V. N.; Mantarakis, P.			THE LARGE BUILT WATER CLOCK OF AMPHIARAEION	MEDITERRANEAN ARCHAEOLOGY & ARCHAEOMETRY			English	Article						water clocks; Ancient Greece; Oropos; Attica		A very well preserved ancient water clock was discovered during excavations at the Amphiaraeion, in Oropos, Greece. The Amphiaraeion, a famous religious and oracle center of the deified healer Amphiaraus, was active from the pre-classic period until the replacement of the ancient religion by Christianity in the 5(th) Century A.D.. The foretelling was supposedly done through dreams sent by the god…	[Theodossiou, E.; Manimanis, V. N.] Univ Athens, Fac Phys, Dept Astrophys Astron & Mech, Zografos 15784, Greece; [Katsiotis, M.] Natl Tech Univ Athens, Athens, Greece	National & Kapodistrian University of Athens; National Technical University of Athens	Theodossiou, E (corresponding author), Univ Athens, Fac Phys, Dept Astrophys Astron & Mech, Zografos 15784, Greece.	etheodos@phys.uoa.gr							17	5	5	0	2	UNIV AGEAN, DEPT MEDITERRANEAN STUD	RHODES	1 DEMOKRATIAS AV, RHODES, 85100, GREECE	1108-9628			MEDITERR ARCHAEOL AR	Mediterr. Archaeol. Archaeom.		2010	10	1
J	Clendenon, C				Clendenon, Cindy			KARST HYDROLOGY IN ANCIENT MYTHS FROM ARCADIA AND ARGOLIS, GREECE	ACTA CARSOLOGICA			English	Article						hydromythology; geomythology; history of karstology; ancient water tracing; Greece	HYDROGEOLOGY; HISTORY	Cindy Clendenon: Karst Hydrology in Ancient Myths from Arcadia and Argolis, Greece The history of karst science includes ancient Greek literary narratives that describe the behavior of karstic waters, yet remain largely unrecognized for their hydrogeological relevance. This paper integrates karst hydrology with ancient myth and travelogues describing natural features in Arcadia and Argolis of the…	Fineline Sci Press, Michigan Dept Environm Qual, Lansing, MI 48901 USA		Clendenon, C (corresponding author), Fineline Sci Press, Michigan Dept Environm Qual, POB 10014, Lansing, MI 48901 USA.	c2editor@bloombb.com							53	14	15	0	9	KARST RESEARCH INST ZRC SAZU	POSTOJNA	TITOV TRG 2, POSTOJNA, SI-6230, SLOVENIA	0583-6050	1580-2612		ACTA CARSOLOGICA	ACTA CARSOLOGICA		2009	38	1
J	Clendenon, C				Clendenon, Cindy			ANCIENT GREEK HYDROMYTHS ABOUT THE SUBMARINE TRANSPORT OF TERRESTRIAL FRESH WATER THROUGH SEABEDS OFFSHORE OF KARSTIC REGIONS	ACTA CARSOLOGICA			English	Article						submarine groundwater discharge; submarine karst springs; coastal karst aquifers; hydromythology; geomythology; history of karstology	UNITED-STATES; GROUNDWATER; HYDROGEOLOGY; INTERFACE	Cindy Clendenon: Ancient Greek Hydromyths About the Submarine Transport of Terrestrial Fresh Water Through Seabeds Offshore of Karstic Regions This Study examined the relationship between ancient Greek texts and the physical possibility Of focused, distal flow of terrestrial fresh water through the seabed, particularly offshore of karstic coasts. The four ancient texts which were analyzed describ…	Fineline Sci Press, Michigan Dept Environm Qual, Lansing, MI 48901 USA		Clendenon, C (corresponding author), Fineline Sci Press, Michigan Dept Environm Qual, POB 10014, Lansing, MI 48901 USA.	c2editor@bloombb.com							42	7	7	0	8	KARST RESEARCH INST ZRC SAZU	POSTOJNA	TITOV TRG 2, POSTOJNA, SI-6230, SLOVENIA	0583-6050	1580-2612		ACTA CARSOLOGICA	ACTA CARSOLOGICA		2009	38	2-3
C	Showleh, T		Angelakis, AN; Koutsoyiannis, D		Showleh, T.			Water management in the bronze age: Greece and Anatolia	Insights into Water Management: Lessons from Water and Wastewater Technologies in Ancient Civilizations	WATER SCIENCE AND TECHNOLOGY: WATER SUPPLY		English	Proceedings Paper	1st IWA International Symposium on Water and Wastewater Technologies in Ancient Civilization	OCT 28-30, 2006	Iraklio, GREECE			kopais; mycenae; Persia; tiryns; Troy		While the water management systems of Minoan Crete are legendary, water management on the Greek mainland in the Mycenaean period also shows a high degree of technological sophistication. Projects considered in this paper include the draining of the Kopais Lake, generally agreed to be one of the greatest engineering achievements of early antiquity; the cistern at Mycenae with its corbelled access …	Concordia Univ, Dept Mech Engn, Montreal, PQ H3G 1M8, Canada	Concordia University - Canada	Showleh, T (corresponding author), Concordia Univ, Dept Mech Engn, Montreal, PQ H3G 1M8, Canada.								9	4	4	1	3	I W A PUBLISHING	LONDON	ALLIANCE HOUSE, 12 CAXTON ST, LONDON SW1H 0QS, ENGLAND	1606-9749		978-1-84339-610-9	WA SCI TECHNOL			2007	7	1
J	Etiope, G; Papatheodorou, G; Christodoulou, D; Geraga, M; Favali, P				Etiope, G.; Papatheodorou, G.; Christodoulou, D.; Geraga, M.; Favali, P.			The geological links of the ancient Delphic Oracle (Greece): A reappraisal of natural gas occurrence and origin	GEOLOGY			English	Article						Delphi; gas; seeps; fault; methane; ethylene		Recent studies have speculated that the prophetic powers of Pythia, the woman of the Delphic Oracle, at the Temple of Apollo in Greece, were induced by hydrocarbon vapors, specifically ethylene, rising from bedrock fissures at the intersection of the E-W Delphi fault with the NNW-SSE Kerna fault, and producing neurotoxic effects, including trance and delirium. New surveys including gas flux from …	Ist Nazl Geofis & Vulcanol, Sect Roma 2, I-00143 Rome, Italy; Univ Patras, Dept Geol, Patras 26500, Greece	Istituto Nazionale Geofisica e Vulcanologia (INGV); University of Patras	Etiope, G (corresponding author), Ist Nazl Geofis & Vulcanol, Sect Roma 2, Via V Murata 605, I-00143 Rome, Italy.		GERAGA, MARIA/AGJ-4293-2022; PAPATHEODOROU, GEORGE/GNP-5019-2022; Etiope, Giuseppe/H-3343-2011; Favali, Paolo/AAR-5166-2021	PAPATHEODOROU, GEORGE/0000-0003-3732-1900; Etiope, Giuseppe/0000-0001-8614-4221; Geraga, Maria/0000-0002-6861-2789; Christodoulou, Dimitris/0000-0002-3012-6865					17	20	20	0	19	GEOLOGICAL SOC AMER, INC	BOULDER	PO BOX 9140, BOULDER, CO 80301-9140 USA	0091-7613	1943-2682		GEOLOGY	Geology	OCT	2006	34	10
C	Petalas, C; Pisinaras, V; Koltsida, K; Tsihrintzis, VA		Lekkas, TD		Petalas, C.; Pisinaras, V.; Koltsida, K.; Tsihrintzis, V. A.			The hydrological regime of the East Basin of Thessaly, Greece	Proceedings of the 9th International Conference on Environmental Science and Technology, Vol A - Oral Presentations, Pts A and B	Proceedings of the International Conference on Environmental Science and Technology		English	Proceedings Paper	9th International Conference on Environmental Science and Technology	SEP 01-03, 2005	Rhodes Isl, GREECE	Global Network Environm Sci & Technol,Univ Aegean, Dept Environm Studies		water resources management; overexploitation of groundwater; water pollution; legislative framework		A typical example of an area with a serious water shortage due to poor water resources management and increased demand for water is the East Basin of Thessaly. This basin constitutes part of the Pinios River basin and covers approximately 3860 km(2). The current situation relative to water resources in the East basin is thoroughly analyzed and evaluated. The average annual rainfall is approximate…	Democritus Univ Thrace, Dept Envrionm Engn, Lab Ecol Engn & Technol, Xanthi 67100, Greece	Democritus University of Thrace	Petalas, C (corresponding author), Democritus Univ Thrace, Dept Envrionm Engn, Lab Ecol Engn & Technol, Xanthi 67100, Greece.		Pisinaras, Vassilios/AAE-8690-2019; Pisinaras, Vassilios/JGC-7767-2023; Tsihrintzis, Vassilios/AAL-5125-2021						11	0	0	0	1	UNIV AEGEAN	ATHENS	VOULGAROKTONOU 30, ATHENS 114 72, GREECE	1106-5516		960-7475-33-X	PROC INT CONF ENV SC			2005
J	Giannoulis, N; Maipa, V; Albanis, T; Konstantinou, I; Dimoliatis, I				Giannoulis, N; Maipa, V; Albanis, T; Konstantinou, I; Dimoliatis, I			The quality of drinking water supplies in North-Western Greece: A three-year follow-up	INTERNATIONAL JOURNAL OF ENVIRONMENTAL ANALYTICAL CHEMISTRY			English	Article; Proceedings Paper	2nd European Conference on Pesticides and Related Organic Micropollutants in the Environment	SEP 26-29, 2002	KERKYRA, GREECE			drinking water; groundwater; contamination; coliforms; streptococci; Greece	MICROBIOLOGICAL QUALITY; GROWTH; CONTAMINATION; GROUNDWATER; WELLS; UK	The study was undertaken to assess the microbiological and physicochemical quality of potable water of Arta, Preveza and Lefkada prefectures in North-Western Greece, during a 36-month survey (1996-1999). Drinking-water samples were collected from twelve points along the distribution networks located at the three cities of Arta, Preveza and Lefkada. The drinking-water quality standards were analyz…	Univ Ioannina, Sch Med, Dept Hyg & Epidemiol, GR-45110 Ioannina, Greece; Univ Ioannina, Dept Chem, Lab Environm Technol, GR-45110 Ioannina, Greece	University of Ioannina; University of Ioannina	Dimoliatis, I (corresponding author), Univ Ioannina, Sch Med, Dept Hyg & Epidemiol, GR-45110 Ioannina, Greece.	idimolia@cc.uoi.gr	Konstantinou, Ioannis/AAN-6223-2021	KONSTANTINOU, IOANNIS/0000-0003-0352-4988					27	4	4	0	1	TAYLOR & FRANCIS LTD	ABINGDON	2-4 PARK SQUARE, MILTON PARK, ABINGDON OR14 4RN, OXON, ENGLAND	0306-7319	1029-0397		INT J ENVIRON AN CH	Int. J. Environ. Anal. Chem.	JAN-MAR	2004	84	1-3
J	Green, S; King, G				Green, S; King, G			The importance of goats to a natural environment: A case study from Epirus (Greece) and Southern Albania	TERRA NOVA			English	Article								In the Epirus region of North-west Greece, spring flows in villages have reduced dramatically over the last few decades, in some cases with serious economic consequences. We argue here that this has resulted from the major reduction of grazing by mountain goats over the same period together with other associated land-use changes. Normally such a contention would be impossible to demonstrate becau…	INST PHYS GLOBE, F-75252 PARIS 05, FRANCE	UDICE-French Research Universities; Universite Paris Cite	Green, S (corresponding author), UNIV MANCHESTER, DEPT SOCIAL ANTHROPOL, ROSCOE BLDG, MANCHESTER M13 9PL, LANCS, ENGLAND.								14	6	6	0	6	WILEY	HOBOKEN	111 RIVER ST, HOBOKEN 07030-5774, NJ USA	0954-4879	1365-3121		TERRA NOVA	Terr. Nova		1996	8	6
21
[truncated: 22 more columns]

## Sheet: Iberian Peninsula
Publication Type	Authors	Book Authors	Book Editors	Book Group Authors	Author Full Names	Book Author Full Names	Group Authors	Article Title	Source Title	Book Series Title	Book Series Subtitle	Language	Document Type	Conference Title	Conference Date	Conference Location	Conference Sponsor	Conference Host	Author Keywords	Keywords Plus	Abstract	Addresses	Affiliations	Reprint Addresses	Email Addresses	Researcher Ids	ORCIDs	Funding Orgs	Funding Name Preferred	Funding Text	Cited References	Cited Reference Count	Times Cited, WoS Core	Times Cited, All Databases	180 Day Usage Count	Since 2013 Usage Count	Publisher	Publisher City	Publisher Address	ISSN	eISSN	ISBN	Journal Abbreviation	Journal ISO Abbreviation	Publication Date	Publication Year	Volume	Issue	Part Number
J	Fernández-Mejuto, M; Andreu, JM; García-Sánchez, E; Palencia, R				Fernandez-Mejuto, Miguel; Miguel Andreu, Jose; Garcia-Sanchez, Ernesto; Palencia, Rebeca			An Assessment of Groundwater Recharge at a Regional Scale for Sustainable Resource Management: Province of Alicante (SE Spain)	WATER			English	Article						aquifer management; groundwater recharge; Mediterranean region; recharge coefficient; Natural Aquifer Recharge (RENATA); Southeast Spain	CLIMATE-CHANGE; SPATIAL-DISTRIBUTION; SEGURA BASIN; SIMPLE-MODEL; WATER; AQUIFERS; OVEREXPLOITATION; VARIABILITY; DEPLETION; QUALITY	For decades, the Province of Alicante, located in the Southeast of Spain, has experienced important economic development associated with groundwater exploitation. The scarcity of superficial resources and irregular distribution in the time and space of rainfall, typical of the Mediterranean environment, together with the extensive limestone outcrops, have made groundwater a key resource for the a…	[Fernandez-Mejuto, Miguel; Palencia, Rebeca] Diputac Prov Alicante, Area Ciclo Hidr, Alicante 03006, Spain; [Fernandez-Mejuto, Miguel; Miguel Andreu, Jose] Univ Alicante, Inst Water & Environm Sci, Alicante 03690, Spain; [Garcia-Sanchez, Ernesto] Univ Miguel Hernandez Elche, Dept Agrochem & Environm, Elche 03202, Spain	Universitat d'Alacant; Universidad Miguel Hernandez de Elche	Fernández-Mejuto, M (corresponding author), Diputac Prov Alicante, Area Ciclo Hidr, Alicante 03006, Spain.;Fernández-Mejuto, M (corresponding author), Univ Alicante, Inst Water & Environm Sci, Alicante 03690, Spain.	mfmejuto@diputaciondealicante.es; andreu.rodes@ua.es; ernesto.garcia@umh.es; r.palencia@diputaciondealicante.es			Spanish Ministry of Economy and Competitiveness (ALTERACLIM) [CGL2015-69773-C2-1-P]; Ministry of Science and Innovation [PID2019-111332RB-C21]; Catedra del Agua (Water Chair) of the University of Alicante; Diputacion de Alicante	Spanish Ministry of Economy and Competitiveness (ALTERACLIM); Ministry of Science and Innovation(Spanish Government); Catedra del Agua (Water Chair) of the University of Alicante; Diputacion de Alicante	This research was funded partially by the projects of the Spanish Ministry of Economy and Competitiveness (ALTERACLIM; CGL2015-69773-C2-1-P) and the Ministry of Science and Innovation (PID2019-111332RB-C21). In the same way, this work was partially funded by Catedra del Agua (Water Chair) of the University of Alicante and Diputacion de Alicante (https://catedradelaguaua.org/accessed on 10 Februar…		96	4	4	1	6	MDPI	BASEL	ST ALBAN-ANLAGE 66, CH-4052 BASEL, SWITZERLAND		2073-4441		WATER-SUI	Water	MAR	2021	13	6
J	Martínez-Valderrama, J; Guirado, E; Maestre, FT				Martinez-Valderrama, Jaime; Guirado, Emilio; Maestre, Fernando T.			Unraveling Misunderstandings about Desertification: The Paradoxical Case of the Tabernas-Sorbas Basin in Southeast Spain	LAND			English	Article						desertification; groundwater; irrigation; olive groves; southern Europe	EROSION; RESPONSES; ALMERIA; COVER; MODEL	From its origins, the concept of desertification has been controversial. The prevailing confusion between two desertification visions, one that considers it as the expansion of deserts and another that emphasizes its anthropogenic component, has been transferred to society. Here we illustrate misunderstandings about desertification using a very illustrative case from the Tabernas-Sorbas Basin (Al…	[Martinez-Valderrama, Jaime; Guirado, Emilio; Maestre, Fernando T.] Univ Alicante, Inst Multidisciplinar Estudio Medio Ramon Margale, Carretera San Vicente Del Raspeig S-N, San Vicente Del Raspeig 03690, Spain; [Maestre, Fernando T.] Univ Alicante, Dept Ecol, Carretera San Vicente Del Raspeig S-N, San Vicente Del Raspeig 03690, Spain	Universitat d'Alacant; Universitat d'Alacant	Martínez-Valderrama, J (corresponding author), Univ Alicante, Inst Multidisciplinar Estudio Medio Ramon Margale, Carretera San Vicente Del Raspeig S-N, San Vicente Del Raspeig 03690, Spain.	jaime.mv@ua.es; e.guirado@ual.es; ft.maestre@gmail.com	Guirado, Emilio/D-2321-2019; Guirado, Emilio/GOG-9161-2022; Maestre, Fernando T./A-6825-2008; Martinez-Valderrama, Jaime/L-1891-2015	Guirado, Emilio/0000-0001-5348-7391; Maestre, Fernando T./0000-0002-7434-4856; Martinez-Valderrama, Jaime/0000-0001-5859-5674	European Research Council [647038]; Generalitat Valenciana [CIDEGENT/2018/041]	European Research Council(European Research Council (ERC)); Generalitat Valenciana(Center for Forestry Research & Experimentation (CIEF))	This research was funded by the European Research Council grant agreement n degrees 647038 (BIODESERT). FTM acknowledges support from Generalitat Valenciana (CIDEGENT/2018/041).		67	13	13	1	12	MDPI	BASEL	ST ALBAN-ANLAGE 66, CH-4052 BASEL, SWITZERLAND		2073-445X		LAND-BASEL	Land	AUG	2020	9	8
J	Guitián, MAR; Real, C; Ramil-Rego, P; Franco, RR; Castro, HL				Rodriguez Guitian, Manuel A.; Real, Carlos; Ramil-Rego, Pablo; Romero Franco, Rosa; Lopez Castro, Hugo			Characteristics, vulnerability and conservation value of active tufa-forming springs on coastal cliffs in the NW Iberian Peninsula	OCEAN & COASTAL MANAGEMENT			English	Article						Atlantic biogeographical region; Littoral cliffs; Bryo-pteridophitic communities; CD 92/43/EEC; Hard-water springs	TRAVERTINE DEPOSITS; ASTURIAS; POACEAE; SYSTEM; BASIN	Tufa-forming hard water springs are classified as a priority natural habitat of community interest and described in Annex I of Community Directive 92/43/EEC as (Natura, 2000 habitat type 7220* Petrifying springs with tufa formation [Cratoneurion]). This type of habitat is scarce along the European Atlantic coast. In this study, petrifying springs in 36 coastal locations in the NW Iberian Peninsul…	[Rodriguez Guitian, Manuel A.] Univ Santiago de Compostela, Escola Politecn Super Enxenaria, Dept Prod Vexetal & Proxectos Enxenaria, GI Terr & Biodiversidade 1934, Lugo 27004, Galicia, Spain; [Real, Carlos] Univ Santiago de Compostela, Escola Politecn Super Enxenaria, Dept Biol Func, Lugo 27004, Galicia, Spain; [Ramil-Rego, Pablo; Lopez Castro, Hugo] Rural Univ Santiago de Compostela, Inst Biodi…	Universidade de Santiago de Compostela; Universidade de Santiago de Compostela; Universidade de Santiago de Compostela	Guitián, MAR (corresponding author), Univ Santiago de Compostela, Escola Politecn Super Enxenaria, Dept Prod Vexetal & Proxectos Enxenaria, GI Terr & Biodiversidade 1934, Lugo 27004, Galicia, Spain.	manuelantonio.rodriguez@usc.es	Real, Carlos/I-1542-2015	Real, Carlos/0000-0002-5433-6728					69	4	4	2	8	ELSEVIER SCI LTD	OXFORD	THE BOULEVARD, LANGFORD LANE, KIDLINGTON, OXFORD OX5 1GB, OXON, ENGLAND	0964-5691	1873-524X		OCEAN COAST MANAGE	Ocean Coastal Manage.	MAY 1	2020	189
J	Martos-Rosillo, S; González-Ramón, A; Ruiz-Constán, A; Marín-Lechado, C; Guardiola-Albert, C; Martos, FM; Jódar, J; Parias, AP				Martos-Rosillo, Sergio; Gonzalez-Ramon, Antonio; Ruiz-Constan, Ana; Marin-Lechado, Carlos; Guardiola-Albert, Carolina; Moral Martos, Francisco; Jodar, Jorge; Pedrera Parias, Antonio			Water management in the high mountain watersheds of the Sierra Nevada National Park (southern Spain). An example of ancestral Integrated Water Management	BOLETIN GEOLOGICO Y MINERO			Spanish	Article								Sierra Nevada is the main mountain range in the southern Iberian Peninsula and has been catalogued as a Biosphere Reserve (1986), a Natural Park (1989) and a National Park (1999). Apart from its ecological, geomorphological and landscape singularities, there are other remarkable hydrological, historical and cultural features, such as the ancestral water management performed at the headwaters of t…	[Martos-Rosillo, Sergio; Gonzalez-Ramon, Antonio; Ruiz-Constan, Ana; Marin-Lechado, Carlos] Inst Geol & Minero Espana, Urbanizac Alcazar del Genil 4, Granada 18006, Spain; [Guardiola-Albert, Carolina] Inst Geol & Minero Espana, C Rios Rosas 23, Madrid 28003, Spain; [Moral Martos, Francisco] Univ Pablo Olavide Sevilla, Carretera Utrera,Km 1, Seville 41013, Spain; [Jodar, Jorge] Inst Geol & Minero …	Universidad Pablo de Olavide	Martos-Rosillo, S (corresponding author), Inst Geol & Minero Espana, Urbanizac Alcazar del Genil 4, Granada 18006, Spain.	s.martos@igme.es; antonio.gonzalez@igme.es; a.ruiz@igme.es; c.marin@igme.es; c.guardiola@igme.es; fmormar@upo.es; j.jodar@igme.es; a.pedrera@igme.es	Jódar, Jorge/E-6457-2017; RUIZ-CONSTÁN, ANA/L-4634-2014; Pedrera, Antonio/L-6463-2014	Jódar, Jorge/0000-0001-8708-0303; RUIZ-CONSTÁN, ANA/0000-0002-0920-6369; Pedrera, Antonio/0000-0003-1990-9292					0	1	1	1	6	INST GEOLOGICA MINERO ESPANA	MADRID	MUSEO GEOMINERO, RIOS ROSAS, NO 23, MADRID, 28003, SPAIN	0366-0176	2253-6167		BOL GEOL MIN	Bol. Geol. Min.	OCT-DEC	2019	130	4
J	Murillo, JM; Vega, L				Manuel Murillo, Jose; Vega, Leticia			Groundwater and Protected Natural Areas in Spain. The hydrogeological characterization of National Parks	BOLETIN GEOLOGICO Y MINERO			Spanish	Article								This study identifies protected natural areas that are related to groundwater in Spain. The methodology used has been applied to the natural areas covered within the scope of the three legal frameworks established in Law 42/2007, 13 December 2007 on Natural Heritage and Biodiversity. These are as follows: (a) areas protected by the Spanish State or its Autonomous Communities; (b) areas protected …	[Manuel Murillo, Jose; Vega, Leticia] Inst Geol & Minero Espana, Rios Rosas 23, Madrid 28003, Spain		Murillo, JM (corresponding author), Inst Geol & Minero Espana, Rios Rosas 23, Madrid 28003, Spain.	jm.murillo@igme.es; l.vega@igme.es	Murillo, Juan M/L-3838-2014	Murillo, Juan M/0000-0003-4961-4030					0	2	2	0	5	INST GEOLOGICA MINERO ESPANA	MADRID	MUSEO GEOMINERO, RIOS ROSAS, NO 23, MADRID, 28003, SPAIN	0366-0176	2253-6167		BOL GEOL MIN	Bol. Geol. Min.	OCT-DEC	2019	130	4
J	Crespo, MBB; Espín, JMG				Bernabe Crespo, Miguel Borja; Gomez Espin, Jose Maria			The Cartagena water supply	CUADERNOS GEOGRAFICOS			Spanish	Article						water supply; water infrastructure; water consumption; Cartagena; Southeast Spain		Water shortage in the region of the Southeast of the Iberian Peninsula, where Cartagena and its surroundings belong, has forced to search and bring foreign water resources in order to meet the supply needs of Cartagena. Initially, due to the absence of permanent rivers, it was necessary to build wells and cisterns; small aqueducts from fountains and springs of limited capacity, and subfluvial ext…	[Bernabe Crespo, Miguel Borja; Gomez Espin, Jose Maria] Univ Murcia, E-30001 Murcia, Spain	University of Murcia	Crespo, MBB (corresponding author), Univ Murcia, E-30001 Murcia, Spain.	miguelborjabc@gmail.com; espin@um.es	ESPIN, JOSE MARIA GOMEZ/AAA-4530-2019; BERNABE-CRESPO, MIGUEL BORJA/AAA-4538-2019						32	1	1	0	5	UNIV GRANADA	GRANADA	CUESTA DEL HOSPICIO S-N, GRANADA, 18071, SPAIN	0210-5462			CUAD GEOGR	Cuad. Geogr.		2015	54	2
J	Orengo, HA; Ejarque, A; Albiach, R				Orengo, Hector A.; Ejarque, Ana; Albiach, Rosa			Water management and land-use practices from the Iron-Age to the Roman period in Eastern Iberia	JOURNAL OF ARCHAEOLOGICAL SCIENCE			English	Article						Water management; Ancient agriculture; Iberian; Roman; GIS; Remote sensing; Eastern Iberia		This study investigates water and land usage in the territory of La Carencia, an Ibero-Roman city located near Tuns (Valencia, Spain) in Eastern Iberia. The outstanding political importance of La Carencia during the Iberian Iron-Age period is attested by its large size, the monumental character of its structures and on-site finds. Multidisciplinary and micro-regional landscape work at its territo…	[Orengo, Hector A.] Univ Sheffield, Dept Archaeol, Sheffield S1 4ET, S Yorkshire, England; [Ejarque, Ana] Univ Barcelona, Dept Prehist Ancient Hist & Archaeol, Seminar Prehist Study & Res SERP, Barcelona 08001, Spain; [Albiach, Rosa] Museu Prehist Valencia, Serv Invest Prehist, Valencia 46003, Spain	University of Sheffield; University of Barcelona	Orengo, HA (corresponding author), Univ Sheffield, Dept Archaeol, Northgate House,West St, Sheffield S1 4ET, S Yorkshire, England.	Hector.Orengo@sheffield.ac.uk	Ejarque, Ana/I-7579-2014; Orengo, Hector A./S-3955-2018	Ejarque, Ana/0000-0001-9101-5299; Orengo, Hector A./0000-0002-9385-2370; EJARQUE MONTOLIO, Ana Belen/0000-0002-5559-290X	University of Nottingham	University of Nottingham	The Institut Cartografic Valencia (ICV) provided the LiDAR data. The digital orthophotographs were provided by the ICV and PNOA, Instituto Geografico Nacional. The University of Nottingham awarded the first author a Nottingham Advance Research Fellowship that allowed him to develop this study.		37	7	7	1	29	ACADEMIC PRESS LTD- ELSEVIER SCIENCE LTD	LONDON	24-28 OVAL RD, LONDON NW1 7DX, ENGLAND	0305-4403	1095-9238		J ARCHAEOL SCI	J. Archaeol. Sci.	SEP	2014	49
J	Cuchí-Oterino, JA; Rodríguez-Caro, JB; de la Noceda-Márquez, CG				Cuchí-Oterino, JA; Rodríguez-Caro, JB; de la Noceda-Márquez, CG			Overview of hydrogeothermics in Spain	ENVIRONMENTAL GEOLOGY			English	Article						mineral waters; thermal waters; Spain		Hydrothermic features in Spain have been used since ancient times for therapeutic purposes. At present, the number of spas has decreased notably, although some of them have been restored for aesthetic reasons. From 1970 onwards hydrogeothermic energy started to be used. There are some boreholes and small facilities at several places in Spain, mostly on the Mediterranean coast and near Madrid. The…	Politecn Huesca, E-22071 Huesca, Spain; Inst Technol Geominero Espana, E-22003 Madrid, Spain		Politecn Huesca, Carretera Cuarte S-N, E-22071 Huesca, Spain.		Garcia-Noceda, Celestino/ABG-6082-2020	Garcia-Noceda, Celestino/0000-0003-2442-8493					18	3	3	0	0	SPRINGER	NEW YORK	233 SPRING ST, NEW YORK, NY 10013 USA	0943-0105			ENVIRON GEOL	Environ. Geol.	MAR	2000	39	5
8
[truncated: 22 more columns]

## Sheet: North Africa
Publication Type	Authors	Book Authors	Book Editors	Book Group Authors	Author Full Names	Book Author Full Names	Group Authors	Article Title	Source Title	Book Series Title	Book Series Subtitle	Language	Document Type	Conference Title	Conference Date	Conference Location	Conference Sponsor	Conference Host	Author Keywords	Keywords Plus	Abstract	Addresses	Affiliations	Reprint Addresses	Email Addresses	Researcher Ids	ORCIDs	Funding Orgs	Funding Name Preferred	Funding Text	Cited References	Cited Reference Count	Times Cited, WoS Core	Times Cited, All Databases	180 Day Usage Count	Since 2013 Usage Count	Publisher	Publisher City	Publisher Address	ISSN	eISSN	ISBN	Journal Abbreviation	Journal ISO Abbreviation	Publication Date	Publication Year	Volume	Issue	Part Number
J	Spanoudi, S; Colfinopoulos, A; Kalavrouziotis, I				Spanoudi, S.; Colfinopoulos, A.; Kalavrouziotis, I			Water management in ancient Alexandria, Egypt. Comparison with Constantinople Hydraulic System	WATER SUPPLY			English	Article						Alexandria; cisterns; hellenistic period; Hippodamus system; rainwater management; reservoirs; tanks; water management	CISTERNS; HISTORY	The collection, evaluation and listing of all available data related to the supply, collection and disposal of water, is a project of combining and recording all the data for infrastructure projects and their structure within the urban structure of Alexandria and the wider region, as it was discovered and studied to this day. The paper is a description of the most important storage structures for…	[Spanoudi, S.] TEI Thessaloniki & Waste Management STET, EAP, Thessaloniki, Greece; [Colfinopoulos, A.; Kalavrouziotis, I] Waste Management Technol, Thessaloniki, Greece		Spanoudi, S (corresponding author), TEI Thessaloniki & Waste Management STET, EAP, Thessaloniki, Greece.	sspanoudi@gmail.com							45	1	1	0	5	IWA PUBLISHING	LONDON	REPUBLIC-EXPORT BLDG, UNITS 1 04 & 1 05, 1 CLOVE CRESCENT, LONDON, ENGLAND	1606-9749	1607-0798		WATER SUPPLY	Water Supply	NOV	2021	21	7
J	Benmarce, K; Hadji, R; Zahri, F; Khanchoul, K; Chouabi, A; Zighmi, K; Hamed, Y				Benmarce, Kadour; Hadji, Riheb; Zahri, Farid; Khanchoul, Kamal; Chouabi, Abdelmadjid; Zighmi, Karim; Hamed, Younes			Hydrochemical and geothermometry characterization for a geothermal system in semiarid dry climate: The case study of Hamma spring (Northeast Algeria)	JOURNAL OF AFRICAN EARTH SCIENCES			English	Article						Spring; Geothermometry; Geothermal gradient; IIRG; Electrical conductivity	THERMAL SPRINGS; GROUNDWATER; SUSCEPTIBILITY; REGION; GIS; HYDROGEOCHEMISTRY; AQUIFER; TUNISIA; GENESIS; WATERS	Climate change has increased the odds of worsening drought in arid and semiarid dry regions of North Africa. Although the thermal waters have a minimal influence on the yield of aquifers systems, these resources have a great socio-economic value, being widely used for various rheumatologic, dermatologic and psychiatric treatments. Our study aims to characterize the physicochemical parameters and …	[Benmarce, Kadour; Hadji, Riheb; Zahri, Farid; Zighmi, Karim] Univ Ferhat Abbas, Inst Architecture & Earth Sci, Dept Earth Sci, Setif, Algeria; [Benmarce, Kadour; Hadji, Riheb; Zahri, Farid; Zighmi, Karim] Setif 1 Univ, Lab Appl Res Engn Geol Geotech Water Sci & Enviro, Setif, Algeria; [Khanchoul, Kamal; Chouabi, Abdelmadjid] Badji Mokhtar Univ, Annaba, Algeria; [Hamed, Younes] Univ Gafsa, Fac Sc…	Universite Ferhat Abbas Setif; Universite Badji Mokhtar - Annaba	Hadji, R (corresponding author), Univ Farhat Abbas, Dept Earth Sci, Setif, Algeria.	kaddour.benmarce.24@gmail.com; hadjirihab@yahoo.fr; zahrifarid@yahoo.fr; kamel.khanchoul@univ-annaba.dz; mchouabbi@yahoo.fr; zighmi.karim19@gmail.com; hamed_younes@yahoo.fr	Hamed, Younes/ABC-6660-2021; HADJI, Riheb/P-7390-2016	HADJI, Riheb/0000-0002-9632-0812	International Association of Water Resources in the Southern Mediterranean Basin (Tunisia); laboratory of hydrogeology, University of Annaba, (Algeria); laboratory for the Application of Materials to the Environment, Water and Energy (Tunisia)	International Association of Water Resources in the Southern Mediterranean Basin (Tunisia); laboratory of hydrogeology, University of Annaba, (Algeria); laboratory for the Application of Materials to the Environment, Water and Energy (Tunisia)	This study was supported by the International Association of Water Resources in the Southern Mediterranean Basin (Tunisia), laboratory of hydrogeology, University of Annaba, (Algeria) and laboratory for the Application of Materials to the Environment, Water and Energy (Tunisia). We wish to acknowledge the General Direction of Scientific Research and Technological Development (DGRSDT).		66	9	9	0	8	PERGAMON-ELSEVIER SCIENCE LTD	OXFORD	THE BOULEVARD, LANGFORD LANE, KIDLINGTON, OXFORD OX5 1GB, ENGLAND	1464-343X	1879-1956		J AFR EARTH SCI	J. Afr. Earth Sci.	OCT	2021	182
J	Mokadem, N; Redhaounia, B; Besser, H; Ayadi, Y; Khelifi, F; Hamad, A; Hamed, Y; Bouri, S				Mokadem, Naziha; Redhaounia, Belgacem; Besser, Houda; Ayadi, Yosra; Khelifi, Faten; Hamad, Amor; Hamed, Younes; Bouri, Salem			Impact of climate change on groundwater and the extinction of ancient Foggara and springs systems in arid lands in North Africa: a case study in Gafsa basin (Central of Tunisia)	EURO-MEDITERRANEAN JOURNAL FOR ENVIRONMENTAL INTEGRATION			English	Article						Overexploitation; Groundwater; Mkayel; Arid lands; Gafsa basin; Tunisia	WATER-RESOURCES; QANATS; IRRIGATION; OMAN	The rising increase in groundwater abstraction to serve the industrial sector and to fulfill the agricultural and domestic needs, coupled with severe drought periods during the past decades, leads to a growing deficit of water. The drawdown of piezometric levels and progressing degradation of water quality are the main consequences of such intensive exploitation. In this connection, the present s…	[Mokadem, Naziha; Bouri, Salem] Natl Engineers Coll Sfax Tunisia ENIS, Water Energy & Environm Lab L3E, St Soukra Km 3-5, Sfax 3038, Tunisia; [Redhaounia, Belgacem] Water Res & Technol Ctr Borj Cedria CERTE, Georesources Lab, BP 273, Soliman 8020, Tunisia; [Besser, Houda; Ayadi, Yosra; Khelifi, Faten; Hamed, Younes] Fac Sci Gafsa, Res Unity Water Energy & Climate, Gafsa, Tunisia; [Hamad, Amor] Fa…	Universite de Sfax; Ecole Nationale dIngenieurs de Sfax (ENIS); Universite de Gafsa; Universite de Carthage	Redhaounia, B (corresponding author), Water Res & Technol Ctr Borj Cedria CERTE, Georesources Lab, BP 273, Soliman 8020, Tunisia.;Redhaounia, B (corresponding author), Int Assoc Water Resources, Gafsa, Tunisia.	nazouhmoka@gmail.com; belgacem.redhaounia@yahoo.fr; besserhouda@gmail.com; ayadiyosraa@yahoo.fr; fatenkhlifi@outlook.com; hsamir2001@gmail.com; hamed_younes@yahoo.fr; bouri.salem@yahoo.fr	khelifi, faten/ABG-4791-2020; Hamed, Younes/ABC-6660-2021; Bouri, Salem/AAD-9439-2019; Mokadem, Naziha/AAR-9306-2020	khelifi, faten/0000-0001-8348-6525; Mokadem, Naziha/0000-0003-1252-0495					65	31	31	0	3	SPRINGER HEIDELBERG	HEIDELBERG	TIERGARTENSTRASSE 17, D-69121 HEIDELBERG, GERMANY	2365-6433	2365-7448		EURO-MEDITERR J ENVI	Euro-Mediterr. J. Environ. Integrat.	NOV	2018	3	1
J	Powell, O; Fensham, R				Powell, Owen; Fensham, Rod			The history and fate of the Nubian Sandstone Aquifer springs in the oasis depressions of the Western Desert, Egypt	HYDROGEOLOGY JOURNAL			English	Article						Egypt; Groundwater development; Arid regions; History of hydrogeology; Oasis	KHARGA OASIS; STABLE-ISOTOPE; NORTH-AFRICA; OCCUPATION; WETLANDS; SAHARA; QANATS; TUFAS; SUDAN; OASES	Extraction of groundwater for agriculture has resulted in the loss of springs across arid regions of the globe. The history and fate are recorded of the artesian springs of Egypt's Western Desert, from ancient times to the present, spanning the rise and fall of the great civilisations from the Pharoanic dynasties to Persian, Greek and Roman conquests. The study area includes oases Kharga, Dakhla,…	[Powell, Owen] Univ Tasmania, Sch Humanities, Hobart, Tas 7001, Australia; [Fensham, Rod] Univ Queensland, Sch Biol Sci, Queensland Herbarium, Mt Coot Tha Rd, Toowong, Qld 4066, Australia	University of Tasmania; University of Queensland	Powell, O (corresponding author), Univ Tasmania, Sch Humanities, Hobart, Tas 7001, Australia.	owen.powell@uq.edu.au		Fensham, Roderick/0000-0003-3658-5867	Council of Australian Arab Relations	Council of Australian Arab Relations	The authors would like to acknowledge the Council of Australian Arab Relations for their financial support of this project. The authors wish to thank Professor Magdy Torab and Egyptian Environmental Changes Society for their help establishing the project as well as Jennifer Silcock and Anna Flittner for assisting with field work. The authors would also like to acknowledge the Egyptian Geography S…		49	29	29	0	20	SPRINGER	NEW YORK	233 SPRING ST, NEW YORK, NY 10013 USA	1431-2174	1435-0157		HYDROGEOL J	Hydrogeol. J.	MAR	2016	24	2
J	Shams, A				Shams, Ahmed			A rediscovered-new 'Qanat' system in the High Mountains of Sinai Peninsula, with Levantine reflections	JOURNAL OF ARID ENVIRONMENTS			English	Article						Foggara; Irrigation; Levant; Qanat; Sinai Peninsula	ORIGIN	Since the Achaemenid Empire in 532-332 BCE, the 'Qanat' became the central irrigation system in the arid and semi-arid lands. Several terms are used for 'Qanat' in different regions, including the Karez, Qanat, Falaj type Daudi, Qanat Romani, Fuqara (Foggara), or Khettara as known in Central Asia, Persia, Southeast Arabia, Levant, North Africa, or Morocco respectively. Typically, the ground, spri…	Univ Durham, Dept Archaeol, Durham DH1 3LE, England	Durham University	Shams, A (corresponding author), Univ Durham, Dept Archaeol, Dawson Bldg,South Rd, Durham DH1 3LE, England.	ahmed.shams-el-din@durham.ac.uk		Shams, Ahmed/0000-0002-4787-7630					20	5	6	1	21	ACADEMIC PRESS LTD- ELSEVIER SCIENCE LTD	LONDON	24-28 OVAL RD, LONDON NW1 7DX, ENGLAND	0140-1963	1095-922X		J ARID ENVIRON	J. Arid. Environ.	NOV	2014	110
5
[truncated: 22 more columns]

## Sheet: Turkey
Publication Type	Authors	Book Authors	Book Editors	Book Group Authors	Author Full Names	Book Author Full Names	Group Authors	Article Title	Source Title	Book Series Title	Book Series Subtitle	Language	Document Type	Conference Title	Conference Date	Conference Location	Conference Sponsor	Conference Host	Author Keywords	Keywords Plus	Abstract	Addresses	Affiliations	Reprint Addresses	Email Addresses	Researcher Ids	ORCIDs	Funding Orgs	Funding Name Preferred	Funding Text	Cited References	Cited Reference Count	Times Cited, WoS Core	Times Cited, All Databases	180 Day Usage Count	Since 2013 Usage Count	Publisher	Publisher City	Publisher Address	ISSN	eISSN	ISBN	Journal Abbreviation	Journal ISO Abbreviation	Publication Date	Publication Year	Volume	Issue	Part Number
J	Ozcelik, M				Ozcelik, Mehmet			Potential effects of excessive water withdrawal from boreholes drilled in the Antalya (Turkey) travertine plateau and well interactions	EURO-MEDITERRANEAN JOURNAL FOR ENVIRONMENTAL INTEGRATION			English	Article						Drilling; Extreme water withdrawal; Well interaction; Travertine; Antalya	INFLUENCE RADIUS; PUMPING WELL	Food and water demand has risen in recent years as a result of global population growth, economic development, and dietary changes. These trends, combined with the continued use of groundwater resources, have resulted in significant aquifer depletion rates in every country. Antalya's current water resources are springs and underground waters on the travertine plateau. On the karstic travertine pl…	[Ozcelik, Mehmet] Suleyman Demirel Univ, Engn Fac, Geol Engn, Isparta, Turkey	Suleyman Demirel University	Ozcelik, M (corresponding author), Suleyman Demirel Univ, Engn Fac, Geol Engn, Isparta, Turkey.	ozcelikmehmet@sdu.edu.tr	Ozcelik, Mehmet/AAE-9565-2020	Ozcelik, Mehmet/0000-0003-4511-1946					27	0	0	2	8	SPRINGER HEIDELBERG	HEIDELBERG	TIERGARTENSTRASSE 17, D-69121 HEIDELBERG, GERMANY	2365-6433	2365-7448		EURO-MEDITERR J ENVI	Euro-Mediterr. J. Environ. Integrat.	JUN	2022	7	2
J	Akar, T; Gemici, U; Somay-Altas, M; Tarcan, G				Akar, Toygar; Gemici, Unsal; Somay-Altas, Melis; Tarcan, Gultekin			Numerical modeling of fluid flow and heat transfer in Kursunlu geothermal field-KGF (Salihli, Manisa / Turkey)	TURKISH JOURNAL OF EARTH SCIENCES			English	Article						Geothermal aquifer; groundwater modeling; fluid flow mechanism; Salihli; FEFLOW	WESTERN ANATOLIA; MENDERES-MASSIF; EVOLUTION; WATERS; AREAS	Nowadays, the need for energy is increasing more and more. It is more difficult to acquire new resources in various fields than to preserve existing energy resources. Although Turkey is a very rich state in terms of various energy resources, misuse of these resources can even lead to conflicts that may occur between the states in forthcoming years. In today's economic conditions, we can only prot…	[Akar, Toygar; Gemici, Unsal; Somay-Altas, Melis; Tarcan, Gultekin] Dokuz Eylul Univ, Dept Geol Engn, Izmir, Turkey	Dokuz Eylul University	Akar, T (corresponding author), Dokuz Eylul Univ, Dept Geol Engn, Izmir, Turkey.	toygar.akar@deu.edu.tr	Somay-Altas, Melis/G-2890-2017	Somay-Altas, Melis/0000-0001-8451-046X	Department of Scientific Research Project Unit (BAP) of Dokuz Eylul University [KB.FEN.076]	Department of Scientific Research Project Unit (BAP) of Dokuz Eylul University	This research was funded by the Department of Scientific Research Project Unit (BAP) of Dokuz Eylul University with the Project number of 2012.KB.FEN.076.		42	2	2	0	8	Tubitak Scientific & Technological Research Council Turkey	ANKARA	ATATURK BULVARI NO 221, KAVAKLIDERE, TR-06100 ANKARA, TURKIYE	1300-0985			TURK J EARTH SCI	Turk. J. Earth Sci.		2021	30	9
J	Bozdag, A; Ince, I; Bozdag, A; Hatir, ME; Tosunlar, MB; Korkanç, M				Bozdag, Ali; Ince, Ismail; Bozdag, Ayla; Hatir, M. Ergun; Tosunlar, M. Bahadir; Korkanc, Mustafa			An assessment of deterioration in cultural heritage: the unique case of Eflatunpinar Hittite Water Monument in Konya, Turkey	BULLETIN OF ENGINEERING GEOLOGY AND THE ENVIRONMENT			English	Article						Non-destructive tests; Deterioration; Physico-mechanical properties; Eflatunpinar Hittite Water Monument; Building stone	FREEZE-THAW; MECHANICAL-PROPERTIES; BUILDING-MATERIALS; CARBONATE ROCKS; CYCLES; DECAY; VELOCITY; MODEL	Stone monuments are important symbols of cultural heritage of countries. However, many environmental factors negatively affect these monuments. The increasing damage on the stone monuments and the danger of irreversible loss of cultural heritage have resulted in growing efforts for the preservation of the monuments. Eflatunpinar Hittite Water Monument in Beysehir, Konya, Turkey, is a unique Hitti…	[Bozdag, Ali; Ince, Ismail; Bozdag, Ayla] Konya Tech Univ, Fac Engn & Nat Sci, Dept Geol Engn, Konya, Turkey; [Hatir, M. Ergun] Necmettin Erbakan Univ, Fac Fine Arts, Dept Interior Architecture & Environm Design, Konya, Turkey; [Tosunlar, M. Bahadir] Mus Alparslan Univ, Fac Engn & Architecture, Dept Architect, Mus, Turkey; [Korkanc, Mustafa] Nigde Omer Halisdemir Univ, Dept Geol Engn, Fac Engn, N…	Konya Technical University; Necmettin Erbakan University; Mus Alparslan University; Nigde Omer Halisdemir University	Bozdag, A (corresponding author), Konya Tech Univ, Fac Engn & Nat Sci, Dept Geol Engn, Konya, Turkey.	abozdag@ktun.edu.tr	Ergün, Mehmet/AAV-7918-2020; Korkanç, Mustafa/AAE-6933-2020; ince, ismail/AAA-3236-2021	ince, ismail/0000-0002-6692-7584					66	21	21	4	35	SPRINGER HEIDELBERG	HEIDELBERG	TIERGARTENSTRASSE 17, D-69121 HEIDELBERG, GERMANY	1435-9529	1435-9537		B ENG GEOL ENVIRON	Bull. Eng. Geol. Environ.	APR	2020	79	3
S	Yazicigil, H; Ekmekci, M		Harmancioglu, NB; Altinbilek, D		Yazicigil, Hasan; Ekmekci, Mehmet			Groundwater	WATER RESOURCES OF TURKEY	World Water Resources		English	Article; Book Chapter						Turkish groundwater; Turkish aquifers; Safe yield; Sustainable yield; Groundwater management	MANAGEMENT; ANATOLIA	About 18% of the total water resources potential of Turkey is made up of groundwater resources. Significant portion of the streamflow of major rivers is supplied by groundwater through springs and baseflow. In 1960s and early 1970s, the financial capacity of Turkey did not allow construction of large dams for irrigation. Development of groundwater resources in alluvial plain aquifers where the ag…	[Yazicigil, Hasan] Middle East Tech Univ, Dept Geol Engn, Ankara, Turkey; [Ekmekci, Mehmet] Hacettepe Univ, Hydrogeol Engn Program, Ankara, Turkey; [Ekmekci, Mehmet] Hacettepe Univ, Int Res Ctr Karst Water Resources, Ankara, Turkey	Middle East Technical University; Hacettepe University; Hacettepe University	Yazicigil, H (corresponding author), Middle East Tech Univ, Dept Geol Engn, Ankara, Turkey.	hyazici@metu.edu.tr; ekmekci@hacettepe.edu.tr	EKMEKCI, Mehmet/ABC-9363-2020; , Hasan/AAT-2055-2021						46	2	3	1	18	SPRINGER INTERNATIONAL PUBLISHING AG	CHAM	GEWERBESTRASSE 11, CHAM, CH-6330, SWITZERLAND	2509-7385	2509-7393	978-3-030-11729-0; 978-3-030-11728-3	WOR WATER RESOUR			2020	2
J	Günay, G; Güner, N; Törk, K				Gunay, G.; Guner, N.; Tork, K.			Turkish karst aquifers	ENVIRONMENTAL EARTH SCIENCES			English	Article						Karst; Spring; Cave; Sinkholes; Speleological investigation	TURKEY	One third of Turkey's surface is underlain by carbonate rocks that have been subdivided into four karst regions. The carbonate rock units are about 200 km wide along the Taurus Mountains that attain elevations of 2500 m. Karst features of western Turkey bordering the Aegean and Mediterranean seas demonstrate the tectonic, lithological and climatic controls on the occurrence, movement, and chemica…	[Gunay, G.] Hacettepe Univ, Ankara, Turkey; [Guner, N.] Dept Energy Raw Mat Res & Explorat, Hydrogeol Res Unit, Ankara, Turkey; [Tork, K.] Dept Geol Res, Karst & Cave Res Unit, Ankara, Turkey	Hacettepe University; Ministry of Energy & Natural Resources - Turkey	Günay, G (corresponding author), Hacettepe Univ, Ankara, Turkey.	ggunay@ttmail.com; noyan.guner@mta.gov.tr; koray.tork@mta.gov.tr							16	12	12	2	21	SPRINGER	NEW YORK	233 SPRING ST, NEW YORK, NY 10013 USA	1866-6280	1866-6299		ENVIRON EARTH SCI	Environ. Earth Sci.	JUL	2015	74	1
J	Yenigün, K; Kürkçüoglu, AC; Yazgan, MS; Gerger, R; Ülgen, U				Yenigun, Kasim; Kurkcuoglu, A. Cihat; Yazgan, Mustafa S.; Gerger, Resit; Ulgen, Ugur			From ancient times to the present: development of the drinking water supply system of Sanliurfa in south-eastern Turkey	WATER SCIENCE AND TECHNOLOGY-WATER SUPPLY			English	Article						ancient times; Edessa; Urfa; water structures		In this paper, water supply, distribution and storage structures in S,anliurfa city that were built since the ancient times are investigated and technological details of some water supply structures are given. The city is one of the oldest cities and has hosted many civilizations throughout the centuries, beginning from 11500 BC. The acquired archaeological heritage shows that the city had import…	[Yenigun, Kasim; Gerger, Resit] Harran Univ, Civil Eng Dept, Sanliurfa, Turkey; [Kurkcuoglu, A. Cihat] Harran Univ, Hist Arts Dept, Sanliurfa, Turkey; [Yazgan, Mustafa S.] Istanbul Tech Univ, Environm Eng Dept, TR-80626 Istanbul, Turkey; [Ulgen, Ugur] Dokuz Eylul Univ, Civil Eng Dept, Izmir, Turkey	Harran University; Harran University; Istanbul Technical University; Dokuz Eylul University	Yenigün, K (corresponding author), Harran Univ, Civil Eng Dept, Osmanbey Campus, Sanliurfa, Turkey.	kyenigun@harran.edu.tr	Gerger, Reşit/AAZ-4934-2020; yazgan, Mustafa s/E-6957-2011; Yenigun, Kasim/AAK-8216-2020; YENIGUN, KASIM/E-2883-2016	Gerger, Reşit/0000-0002-8654-4310;					14	0	0	0	17	IWA PUBLISHING	LONDON	ALLIANCE HOUSE, 12 CAXTON ST, LONDON SW1H0QS, ENGLAND	1606-9749			WATER SCI TECH-W SUP	Water Sci. Technol.-Water Supply		2013	13	3
J	Ertürk, AEB; Seker, DZ; Öztürk, I				Erturk, A. Esra Bolukbasi; Seker, Dursun Zafer; Ozturk, Izzet			Ottoman period water structures and water-related architecture: examples in Safranbolu, Turkey	WATER SCIENCE AND TECHNOLOGY-WATER SUPPLY			English	Article						aqueduct; Ottoman water structures; pool rooms; Safranbolu; water gauge		Safranbolu is known for the abundance of its water resources. The city is a unique and historic settlement that hosts very beautiful examples of traditional Turkish architecture. The city attracts both national and international tourists. In this paper, firstly the Ottoman period water supply structures of Safranbolu are described. Incekaya Aqueduct and water transmission system, also known as th…	[Erturk, A. Esra Bolukbasi] Karabuk Univ, Div Architectural Hist, Fac Fine Arts & Architecture, Karabuk, Turkey; [Seker, Dursun Zafer] Istanbul Tech Univ, Dept Geomat Engn, Fac Civil Engn, TR-80626 Istanbul, Turkey; [Ozturk, Izzet] Istanbul Tech Univ, Dept Environm Engn, Fac Civil Engn, TR-80626 Istanbul, Turkey	Karabuk University; Istanbul Technical University; Istanbul Technical University	Ertürk, AEB (corresponding author), Karabuk Univ, Div Architectural Hist, Fac Fine Arts & Architecture, Karabuk, Turkey.	esrabolukbasi@karabuk.edu.tr	Seker, Dursun Zafer/ABA-7384-2020; Seker, Dursun Zafer/ADI-6813-2022; Ozturk, Izzet/ABC-3403-2020	Seker, Dursun Zafer/0000-0001-7498-1540; Seker, Dursun Zafer/0000-0001-7498-1540; Ozturk, Izzet/0000-0002-8274-5326					18	1	1	0	6	IWA PUBLISHING	LONDON	ALLIANCE HOUSE, 12 CAXTON ST, LONDON SW1H0QS, ENGLAND	1606-9749			WATER SCI TECH-W SUP	Water Sci. Technol.-Water Supply		2013	13	3
C	Ataberk, E; Baykal, F		Efe, R; Ozturk, M		Ataberk, Emre; Baykal, Fusun			Utilization of natural and cultural resources of Dikili (Izmir) for tourism	2ND INTERNATIONAL GEOGRAPHY SYMPOSIUM-MEDITERRANEAN ENVIRONMENT 2010	Procedia Social and Behavioral Sciences		English	Proceedings Paper	2nd International Geography Symposium-Mediterranean Environment	JUN 02-05, 2010	Antalya, TURKEY			Touristic product; thermal tourism; rural tourism; Dikili		Agriculture, fishing, greenhousing, carpet manufacturing, granite stone engraving and tourism are the primary sources of income in Dikili, Izmir. Tourism started to develop in the region since the 1980s and recently, coastal tourism and domestic tourism have gained importance. The aim of this paper is to demonstrate that beside coasts where coastal tourism takes place, Dikili, has natural and cul…	[Ataberk, Emre] Ege Univ, Program Tourism & Hotel Management, TR-35700 Izmir, Turkey; [Baykal, Fusun] Ege Univ, Fac Letters, Dept Geography, TR-35100 Izmir, Turkey	Ege University; Ege University	Ataberk, E (corresponding author), Ege Univ, Program Tourism & Hotel Management, TR-35700 Izmir, Turkey.	emre.ataberk@ege.edu.tr	Ataberk, Emre/AAM-8553-2021; Baykal, Fusun/AAG-5008-2019						11	9	9	1	24	ELSEVIER SCIENCE BV	AMSTERDAM	SARA BURGERHARTSTRAAT 25, PO BOX 211, 1000 AE AMSTERDAM, NETHERLANDS	1877-0428			PROCD SOC BEHV			2011	19
J	Özer, S; Demircan, N				Ozer, Serkan; Demircan, Neslihan			Place of fountains in urban space: A case study in Erzurum city, Turkey	JOURNAL OF FOOD AGRICULTURE & ENVIRONMENT			English	Article						Fountain; city identity; preservation; classification; Erzurum		Due to the importance of water for humans, special structures were constructed at the points where water was supplied and called fountains. Fountains are the structures taking an important part in Turkish culture and constructed on roadsides from where people can provide water brought through special pipes ending with a tap and poured in a small reservoir. In Anatolian lands, majority of the foun…	[Ozer, Serkan; Demircan, Neslihan] Ataturk Univ, Landscape Architecture Dept, Fac Agr, TR-25240 Erzurum, Turkey	Ataturk University	Özer, S (corresponding author), Ataturk Univ, Landscape Architecture Dept, Fac Agr, TR-25240 Erzurum, Turkey.	sozer2000@hotmail.com	Demircan, Neslihan/A-4617-2016						15	1	1	0	3	WFL PUBL	HELSINKI	MERI-RASTILANTIE 3 C, HELSINKI, FI-00980, FINLAND	1459-0255			J FOOD AGRIC ENVIRON	J. Food Agric. Environ.	JUL-OCT	2010	8	3-4	2
C	Bayram, AF; Ozdemir, A; Ucgun, F; Kansun, G			SGEM	Bayram, A. Ferhat; Ozdemir, Adil; Ucgun, Fatih; Kansun, Gursel			NUMERICAL ANALYSIS OF WATER WELL DRILLING SECTOR OF TURKEY	SGEM 2008: 8TH INTERNATIONAL SCIENTIFIC CONFERENCE, VOL I, CONFERENCE PROCEEDINGS: MODERN MANAGEMENT OF MINE PRODUCING GEOLOGY AND ENVIRONMENTAL PROTECTION			English	Proceedings Paper	8th International Scientific Conference on Modern Management of Mine Producing, Geology and Environmental Protection	JUN 16-20, 2008	Sofia, BULGARIA			Drilling; Water Well Drilling; Groundwater; Numerical Analysis		Performing a numerical analysis of water well drilling sector of Turkey was aimed in this study. Within this purpose, number of the machinery in equipment pool of the institutions and companies which are involved in the water well drilling, yearly drilling quantities, drilling equipment preferences and geological data of 2640 water well drilling boreholes opened in 73 provinces between the years …	[Bayram, A. Ferhat; Kansun, Gursel] Selcuk Univ, Fac Architecture & Engn, Konya, Turkey; [Ozdemir, Adil] Adil Ozdemir Drilling & Engn Co, Izmir, Turkey; [Ucgun, Fatih] Special Prov Adm, Agri, Turkey	Selcuk University	Bayram, AF (corresponding author), Selcuk Univ, Fac Architecture & Engn, Konya, Turkey.		Ozdemir (Dr.), Adil/ABB-1620-2020	Ozdemir (Dr.), Adil/0000-0002-3975-2846					3	0	0	0	0	INT SCIENTIFIC CONFERENCE SGEM	SOFIA	14, KILMENT OHRIDSKY BLVD, SOFIA, 1797, BULGARIA			978-954-91818-1-4				2008
J	Kucukali, S				Kucukali, S.			How Roman engineers selected their water supplies	PROCEEDINGS OF THE INSTITUTION OF CIVIL ENGINEERS-WATER MANAGEMENT			English	Article						history; hydraulics & hydrodynamics; water supply	TURKEY	An account of a historical Roman water supply system in Zonguldak, northwest Turkey on the Black Sea coast is presented. This ancient water supply system demonstrates Roman engineering expertise in water management and hydraulic engineering applications. Although there is a river located near the Roman city (Filyos) with an average annual discharge of 89 m(3)/s (1970-2005 data), Roman engineers p…	Zonguldak Karaelmas Univ, Zonguldak, Turkey	Bulent Ecevit University	Kucukali, S (corresponding author), Zonguldak Karaelmas Univ, Zonguldak, Turkey.								20	1	1	1	11	THOMAS TELFORD PUBLISHING	LONDON	THOMAS TELFORD HOUSE, 1 HERON QUAY, LONDON E14 4JD, ENGLAND	1741-7589			P I CIVIL ENG-WAT M	Proc. Inst. Civil. Eng.-Water Manag.	DEC	2007	160	4
J	Sayili, M; Akca, H; Duman, T; Esengun, K				Sayili, Murat; Akca, Hasan; Duman, Teoman; Esengun, Kemal			Psoriasis treatment via doctor fishes as part of health tourism: A case study of Kangal Fish Spring, Turkey	TOURISM MANAGEMENT			English	Article						psoriasis treatment; Kangal fish spring; spa tourism in Turkey		Spa (thermal) tourism is gaining increasing importance in health tourism. Turkey has numerous thermal sources that have been used to cure a number of common diseases. Among these thermal sources, Kangal Fish Spring has a unique nature with its doctor fish known to cure psoriasis. To date, a number of studies analyzed Kangal Fish Spring as a thermal source with its water and fish characteristics b…	Gaziosmanpasa Univ, Fac Agr, Dept Agr Econ, TR-60240 Tokat, Turkey; Gaziosmanpasa Univ, Sch Tourism & Hotel Management, TR-60400 Tokat, Turkey	Gaziosmanpasa University; Gaziosmanpasa University	Sayili, M (corresponding author), Gaziosmanpasa Univ, Fac Agr, Dept Agr Econ, TR-60240 Tokat, Turkey.	muratsayili@yahoo.corn; akcabasan@yahoo.corn; tdu@gop.edu.tr; esengunkemal@yahoo.com	AKÇA, Hasan/ABI-4534-2020; Duman, Teoman/X-8960-2019	Duman, Teoman/0000-0001-5977-5036					9	34	37	2	54	ELSEVIER SCI LTD	OXFORD	THE BOULEVARD, LANGFORD LANE, KIDLINGTON, OXFORD OX5 1GB, OXON, ENGLAND	0261-5177	1879-3193		TOURISM MANAGE	Tourism Manage.	APR	2007	28	2
J	Dadaser-Celik, F; Brezonik, PL; Stefan, HG				Dadaser-Celik, Filiz; Brezonik, Patrick L.; Stefan, Heinz G.			Hydrologic Sustainability Of The Sultan Marshes In Turkey	WATER INTERNATIONAL			English	Article						Environmental impact; irrigation; Sultan Marshes; sustainability; wetland; water allocation	ENVIRONMENTAL IMPACTS; IRRIGATED AGRICULTURE	Hydrologic changes in the Sultan Marshes ecosystem, a closed-basin wetland in the semi-arid Develi Basin in south-central Turkey, are analyzed and related to intensification of irrigated agriculture in the catchment. Relationships between water-level changes in the marsh, and inflows and outflows of surface water and groundwater are examined. Since the 1980s, surface runoff from the surrounding m…	[Dadaser-Celik, Filiz] Univ Minnesota, Water Resources Sci Program, Minneapolis, MN 55455 USA; [Brezonik, Patrick L.; Stefan, Heinz G.] Univ Minnesota, Dept Civil Engn, Minneapolis, MN 55455 USA	University of Minnesota System; University of Minnesota Twin Cities; University of Minnesota System; University of Minnesota Twin Cities	Dadaser-Celik, F (corresponding author), Univ Minnesota, Water Resources Sci Program, Minneapolis, MN 55455 USA.		Brezonik, Patrick/ISV-2988-2023; Dadaser-Celik, Filiz/AAE-2824-2019	Dadaser-Celik, Filiz/0000-0003-3623-7723					37	11	11	0	8	ROUTLEDGE JOURNALS, TAYLOR & FRANCIS LTD	ABINGDON	2-4 PARK SQUARE, MILTON PARK, ABINGDON OX14 4RN, OXON, ENGLAND	0250-8060	1941-1707		WATER INT	Water Int.		2007	32	5
J	Güler, C				Guler, Cuneyt			Evaluation of maximum contaminant levels in Turkish bottled drinking waters utilizing parameters reported on manufacturer's labeling and government-issued production licenses	JOURNAL OF FOOD COMPOSITION AND ANALYSIS			English	Article						bottled water; mineral water; drinking water standards; maximum contaminant level; Turkey; food safety	MICROBIOLOGICAL QUALITY; SOLD	A total of 189 domestic brands of bottled water consisting of natural spring, natural mineral, drinking and processed drinking types were evaluated by means of both physical and chemical parameters reported on their manufacturer's labeling and/or in government-issued production licenses. A comparison between the water composition and the maximum contaminant levels imposed by the Turkish legislati…	Mersin Univ, TR-33343 Mersin, Turkey	Mersin University	Güler, C (corresponding author), Mersin Univ, Ciftlikkoy Kampusu, TR-33343 Mersin, Turkey.	cguler@mersin.edu.tr	GÜLER, CÜNEYT/A-7755-2008	GÜLER, CÜNEYT/0000-0001-8821-6532					24	59	60	0	8	ACADEMIC PRESS INC ELSEVIER SCIENCE	SAN DIEGO	525 B ST, STE 1900, SAN DIEGO, CA 92101-4495 USA	0889-1575	1096-0481		J FOOD COMPOS ANAL	J. Food Compos. Anal.	MAY	2007	20	3-4
C	Baba, A; Ayyildiz, O		Tellam, JH; Rivett, MO; Israfilov, RG; Herringshaw, LG		Baba, Alper; Ayyildiz, Onder			Urban groundwater pollution in Turkey - A national review of urban groundwater quality issues	URBAN GROUNDWATER MANAGEMENT AND SUSTAINABILITY	NATO Science Series IV-Earth and Environmental Sciences		English	Proceedings Paper	Conference of the NATO Advanced Study Institute on Management and Sustainable Development of Urban Groundwater Systems	AUG 06-15, 2004	Baku, AZERBAIJAN	NATO		Turkey; pollution; pesticides; septic tanks; industrial wastes; natural pollutant sources; geothermal waters	FLY-ASH; LEACHING CHARACTERISTICS; TRACE-ELEMENTS; YATAGAN MUGLA; DISPOSAL SITE; WATER-QUALITY; POWER-PLANT; CONTAMINATION; ISPARTA; SPRINGS	Groundwater pollution in Turkey is examined. Important natural sources of groundwater pollution identified include seawater intrusion, discharges from contaminated lakes and streams, geothermal waters, and dissolution of minerals. The major sources of anthropogenic groundwater contamination identified are: agricultural pesticides and fertilizers; mining waste products; industrial waste; on-site s…	[Baba, Alper; Ayyildiz, Onder] Canakkale Onsekiz Mart Univ, Engn & Architecture Fac, Geol Engn Dept, TR-17100 Canakkale, Turkey	Canakkale Onsekiz Mart University	Baba, A (corresponding author), Canakkale Onsekiz Mart Univ, Engn & Architecture Fac, Geol Engn Dept, TR-17100 Canakkale, Turkey.	alperbaba@comu.edu.tr	BABA, ALPER/AAG-6148-2020						56	10	10	0	6	SPRINGER	DORDRECHT	PO BOX 17, 3300 AA DORDRECHT, NETHERLANDS	1568-1238		1-4020-5173-5	NATO SCI S SS IV EAR	NATO Sci. Series IV Earth Environ. Sciences		2006	74
J	Dilsiz, C				Dilsiz, C			Environmental issues concerning natural resources at Pamukkale protected site, southwest Turkey	ENVIRONMENTAL GEOLOGY			English	Article						Pamukkale; SW Turkey		Pamukkale protected site is located 20 km away from the provincial center of Denizli in southwest Turkey. This site has unique natural and cultural assets such as hot water springs, white travertine terraces, and cultural ruins of the ancient city of Hierapolis. The rising interest in this site leads to irreversible deterioration of natural and cultural assets. This study reveals the environmenta…	Vrije Univ Amsterdam, Fac Earth Sci, NL-1081 HV Amsterdam, Netherlands	Vrije Universiteit Amsterdam	Dilsiz, C (corresponding author), Vrije Univ Amsterdam, Fac Earth Sci, De Boelelaan 1105, NL-1081 HV Amsterdam, Netherlands.								17	7	8	1	6	SPRINGER-VERLAG	NEW YORK	175 FIFTH AVE, NEW YORK, NY 10010 USA	0943-0105			ENVIRON GEOL	Environ. Geol.	MAR	2002	41	7
J	Ortloff, CR; Crouch, DP				Ortloff, CR; Crouch, DP			The urban water supply and distribution system of the Ionian city of Ephesos in the Roman Imperial Period	JOURNAL OF ARCHAEOLOGICAL SCIENCE			English	Article						Ephesos; water system; aqueducts; castellum		Within the ancient Ionian city of Ephesos on the western coast of modern Turkey, monumental buildings and remnants of the urban water supply system survive from archaic, Hellenistic, Roman and Byzantine times. At least four major aqueducts supplied the city and an elaborate system of terracotta piping, supplemented by stone and lead pipes, distributed water to the many public and private building…	CTC United Defense, Numerical Simulation Dep, Santa Clara, CA 95050 USA		Ortloff, CR (corresponding author), CTC United Defense, Numerical Simulation Dep, Santa Clara, CA 95050 USA.								23	29	29	0	19	ACADEMIC PRESS LTD	LONDON	24-28 OVAL RD, LONDON NW1 7DX, ENGLAND	0305-4403			J ARCHAEOL SCI	J. Archaeol. Sci.	AUG	2001	28	8
J	Simsek, S; Günay, G; Elhatip, H; Ekmekçi, M				Simsek, S; Günay, G; Elhatip, H; Ekmekçi, M			Environmental protection of geothermal waters and travertines at Pamukkale, Turkey	GEOTHERMICS			English	Article						hot springs; travertine; pollution; tourism; environmental protection; Pamukkale; Turkey		Tourism, and associated commercial activities have led to physical damage and discolouration of the famous white travertine terraces at Pamukkale, a World Heritage Site. To mitigate these environmental impacts, scientific studies were started in 1993 by UKAM and the Ministry of Culture. These show that an aquifer within Paleozoic marbles and Mesozoic limestones, with a capacity of delivering 510 …	Hacettepe Univ, Int Res & Applicat Ctr Karst Water Resources, TR-06532 Ankara, Turkey	Hacettepe University	Simsek, S (corresponding author), Hacettepe Univ, Int Res & Applicat Ctr Karst Water Resources, TR-06532 Ankara, Turkey.		EKMEKCI, Mehmet/ABC-9363-2020						11	52	56	2	27	PERGAMON-ELSEVIER SCIENCE LTD	OXFORD	THE BOULEVARD, LANGFORD LANE, KIDLINGTON, OXFORD OX5 1GB, ENGLAND	0375-6505			GEOTHERMICS	Geothermics	AUG-OCT	2000	29	4-5
C	Ekmekci, M; Degirmenci, M; Erduran, B; Sevuk, OF		Gunay, G; Johnson, AI		Ekmekci, M; Degirmenci, M; Erduran, B; Sevuk, OF			Groundwater pollution in Iskenderun karst basin, SE Turkey	KARST WATERS & ENVIRONMENTAL IMPACTS			English	Proceedings Paper	5th International Symposium and Field Seminar on Karst Waters and Environmental Impacts	SEP 10-20, 1995	ANTALYA, TURKEY	Hacettepe Univ,Int Res & Appl Ctr Karst Water Resources,Hacettepe Univ, Fac Engn Hydrogeol Eng Program,Int Assoc Hydrogeologists,Int Assoc Hydrol Sci,Int Atom Energy Agcy,Med Campus Project 355,Sci & Tech Res Council Turkey,Turkish Promot Fund,UNESCO, Div Water Sci,UNESCO, IGCP Project 379,UN Dev Program,UN Envirornm Program,UN Nat Resources & Environm Planning & Management Branch,US Natl Comm Sc…				Iskenderun city, situated in the East-Mediterranean region of Turkey, suffers from shortage of water as a consequence of rapid economic development and population increase. The two main water bearing lithologic formations in oskenderun province are the coastal alluvium and the extensively karstified carbonate rocks. Abuse of the karstic depressions and solution cavities as waste disposal sites th…			Ekmekci, M (corresponding author), HACETTEPE UNIV,INT RES CTR KARST WATER RESOURCES,ANKARA,TURKEY.		EKMEKCI, Mehmet/ABC-9363-2020						0	1	1	0	2	A A BALKEMA	ROTTERDAM	PO BOX 1675, 3000 BR ROTTERDAM, NETHERLANDS			90-5410-858-4				1997
J	Ekmekci, M; Gunay, G				Ekmekci, M; Gunay, G			Role of public awareness in groundwater protection	ENVIRONMENTAL GEOLOGY			English	Article; Proceedings Paper	International Symposium and Field Seminar on Karst Waters and Environmental Impacts	SEP 10-20, 1996	ANTALYA, TURKEY			groundwater pollution; protection zones; public awareness; administration; law and regulations; turkey		Scarcity of water, particularly in towns situated along the Mediterranean coast where the main aquifers are in karstic carbonate rocks, necessitates more thoroughness in exploiting and protecting the groundwater resources. Geomorphological and hydrogeological studies have revealed large quantities of the input and throughput features, such as sinkholes, dolines, uvalas and poljes in the recharge …			Ekmekci, M (corresponding author), UNIV HACETTEPE,INT RES & APPLICAT CTR KARST WATER RESOURCES,TR-06532 ANKARA,TURKEY.		EKMEKCI, Mehmet/ABC-9363-2020						2	12	13	0	15	SPRINGER VERLAG	NEW YORK	175 FIFTH AVE, NEW YORK, NY 10010	0177-5146			ENVIRON GEOL	Environ. Geol.	MAR	1997	30	1-2
20
[truncated: 22 more columns]

## Sheet: California
Publication Type	Authors	Book Authors	Book Editors	Book Group Authors	Author Full Names	Book Author Full Names	Group Authors	Article Title	Source Title	Book Series Title	Book Series Subtitle	Language	Document Type	Conference Title	Conference Date	Conference Location	Conference Sponsor	Conference Host	Author Keywords	Keywords Plus	Abstract	Addresses	Affiliations	Reprint Addresses	Email Addresses	Researcher Ids	ORCIDs	Funding Orgs	Funding Name Preferred	Funding Text	Cited References	Cited Reference Count	Times Cited, WoS Core	Times Cited, All Databases	180 Day Usage Count	Since 2013 Usage Count	Publisher	Publisher City	Publisher Address	ISSN	eISSN	ISBN	Journal Abbreviation	Journal ISO Abbreviation	Publication Date	Publication Year	Volume	Issue	Part Number
[truncated: 9 more rows]
[truncated: 22 more columns]

## Sheet: Chile
Publication Type	Authors	Book Authors	Book Editors	Book Group Authors	Author Full Names	Book Author Full Names	Group Authors	Article Title	Source Title	Book Series Title	Book Series Subtitle	Language	Document Type	Conference Title	Conference Date	Conference Location	Conference Sponsor	Conference Host	Author Keywords	Keywords Plus	Abstract	Addresses	Affiliations	Reprint Addresses	Email Addresses	Researcher Ids	ORCIDs	Funding Orgs	Funding Name Preferred	Funding Text	Cited References	Cited Reference Count	Times Cited, WoS Core	Times Cited, All Databases	180 Day Usage Count	Since 2013 Usage Count	Publisher	Publisher City	Publisher Address	ISSN	eISSN	ISBN	Journal Abbreviation	Journal ISO Abbreviation	Publication Date	Publication Year	Volume	Issue	Part Number
[truncated: 3 more rows]
[truncated: 22 more columns]

[truncated: 1 more sheets: South Africa]
